# Supplementary material for: D-DI/PLT can be a prognostic indicator for sepsis
Source: PeerJ. 2023 Sep 5;11:e15910. doi: 10.7717/peerj.15910 (PMC10487589; doi:10.7717/peerj.15910)
Supplement: Supplemental Information 3 — The original clinical information we collected and the related analyses in the context. [file peerj-11-15910-s003.xlsx]

## Sheet: Raw data
Sample	ID	time	Outcome	pathogene	Temperature	Respiratory Rate	Heart Rate	ICU	Gender	hospital day	age	SBP	DBP	PO₂	PCO₂	pH	Lac	CO₂	SOFA	NEWS	BNP	CK-MB	CnT-I	MB	PT	APTT	FIB	INR	DG-DI	UA	Urea	LDH	IL-6	PCT	NE	LYM	NLR	PLR	RLR	RPR	D-DI/PLT	RDW/ALB	RDW	PLT	TBIL	Ccr	ALB	AST	ALT
1	81235222	28	Survival	gram-	36.2	30	105	No	Female	1	47	183	105	59	43	7.45	1.4	14.5	14	9	1849	10.9	0.125	105.3	10.6	18.2	8.53	1.91	5.52	331	13.49	713	155.9	4.39	22.84	0.87	26.2529	249.425	70	0.280645	0.0254378	1.9902	60.9	217	22.2	90	30.6	19	34
2	60802503	28	Survival	gram-	39.3	22	80	No	Female	1	79	95	60	170	37	7.43	2.2	33.3	18	14	24824	8.1	1.093	2094.6	16	43.7	3.94	1.41	2.6	746	39	349	77.77	6.78	7.56	0.93	8.12903	186.022	75.1613	0.404046	0.0150289	2.34564	69.9	173	54.7	199	29.8	202	596
3	90117230	28	Survival	gram+	36.4	22	113	Yes	Female	1	77	134	83	120	20.3	7.38	1.1	19.9	5	6	2541	14.5	0.946	57	11.7	16	2.7	1.02	1.59	289	4.99	479	276.5	0.273	8.75	0.54	16.2037	300	81.1111	0.27037	0.00981481	1.30357	43.8	162	46.3	106	33.6	21	19
4	80559891	28	Survival	gram-	40.2	19	105	Yes	Male	1	69	141	75	92	24	7.51	7.4	17.2	3	5	152.3	2.3	0.001	31.5	11.3	17.2	3.5	0.98	2.58	231	4.27	273	324	0.273	10.46	1.85	5.65405	178.378	25.2973	0.141818	0.00781818	1.28571	46.8	330	11.7	59	36.4	16	33
5	1800968424	28	Survival	gram-	36.7	38	94	No	Male	1	61	130	78	49	33	7.45	1.4	17.5	7	9	104	3.6	0.024	17	12	17	6.8	1.05	3.55	190	4.65	265	39.22	0.086	4.2	0.9	4.66667	241.111	53.4444	0.221659	0.0163594	1.41888	48.1	217	13.3	54	33.9	2	11
6	1800565380	28	Survival	gram+	38	20	105	No	Male	1	57	122	77	135	25	7.41	1.2	29.1	3	2	173.4	0.6	0.519	38.1	11.9	15.5	3.56	1.03	1.2	146	2.92	339	64.32	0.152	3.28	2.06	1.59223	57.2816	22.3301	0.389831	0.0101695	1.31805	46	118	23.9	53	34.9	120	189
7	60902424	28	Survival	gram-	36.6	29	75	Yes	Female	1	54	117	80	116	27	7.58	1.8	25.2	2	3	711.8	1.6	1.01	15.5	10.5	18.8	5.39	0.91	2.44	357	6.14	279	9.03	0.171	5.76	1.2	4.8	162.5	38.8333	0.238974	0.0125128	1.16792	46.6	195	18.4	74	39.9	37	28
8	20244821	28	Survival	gram-	38.6	24	132	No	Male	1	51	151	85	73	31	7.43	0.4	20.8	10	8	671.2	2.7	0.035	394.7	12.2	15.4	3.25	1.06	4.63	237	14.16	484	86.44	2.19	10.4	0.96	10.8333	343.75	49.8958	0.145152	0.0140303	1.49687	47.9	330	28.1	254	32	45	50
9	60801465	28	Survival	gram+	36.6	21	95	No	Female	2	68	147	84	63	26	7.53	0.4	12.5	6	5	670.8	1.2	0.308	45.7	12.2	18.7	3.59	2.06	2.64	265	10.05	297	110.6	1.36	7.47	0.82	9.10976	139.024	59.7561	0.429825	0.0231579	1.09865	49	114	12.8	94	44.6	31	39
10	60789375	28	Survival	gram-	38.8	20	90	No	Female	2	80	162	78	108	13.9	7.36	1.3	24.1	11	3	2087	0.9	0.031	15.9	13.2	17.2	3.3	1.17	3.5	315	4.34	303	382.2	0.091	6.03	0.79	7.63291	213.924	67.0886	0.313609	0.0207101	1.99248	53	169	485.5	179	26.6	157	513
11	60826914	28	Survival	gram-	36.6	21	60	Yes	Female	2	77	134	80	70	30	7.41	1.8	11.9	6	4	2077.8	3	0.045	36	13	17.4	5.3	1.14	6.2	59	5.03	228	9.45	29.62	15.16	0.7	21.6571	287.143	72	0.250746	0.0308458	1.95349	50.4	201	20.1	51	25.8	29	33
12	F133052401	28	Survival	gram-	36.4	28	113	Yes	Female	2	50	187	86	57	68	7.36	1.1	15.3	9	7	233.4	1	0.504	13.2	11.6	16.2	4.31	1.01	1.9	287	7.2	200	18.3	0.072	9.19	2.36	3.89407	105.085	20.678	0.196774	0.00766129	1.17308	48.8	248	10.9	46	41.6	7	23
13	1800868946	28	Survival	gram-	36.7	27	98	No	Male	2	79	125	75	55	28	7.48	2.3	27	8	9	608.9	1.1	0.105	48.9	13.7	16.9	5.22	1.2	1.44	168	4.98	243	92.21	0.122	8.11	0.94	8.62766	311.702	53.617	0.172014	0.00491468	1.65246	50.4	293	22.7	59	30.5	50	49
14	60853407	28	Survival	gram-	36.2	33	141	No	Male	2	78	188	120	34	68	7.22	4.5	23.4	14	11	2372	2.3	0.084	21.5	10.4	17.5	1.48	1.43	1.45	349	6.19	276	7.55	0.064	9.33	1.15	8.11304	142.609	40.9565	0.287195	0.00884146	1.0979	47.1	164	15.6	72	42.9	57	75
15	60802389	28	Survival	gram+	36.8	21	109	No	Female	2	74	127	78	50	29	7.52	3.1	25.3	10	6	273.8	1.2	0.004	26	12.7	15.4	7.98	1.11	7.98	224	5.35	575	22.84	0.063	13.18	0.97	13.5876	413.402	47.0103	0.113716	0.0199002	1.38602	45.6	401	22	55	32.9	46	41
16	81013685	28	Survival	gram+	38	19	101	No	Male	2	69	120	74	58	36	7.46	0.9	16.8	10	6	1292	1.2	0.212	15.6	12.2	17.2	3.33	1.06	7.26	457	6.6	393	156	0.067	14.33	1.77	8.09605	116.384	21.4689	0.184466	0.0352427	0.865604	38	206	29.5	88	43.9	24	29
17	81031217	28	Survival	gram-	36.5	21	93	No	Female	2	56	119	79	108	30	7.53	1.3	25.6	7	7	19.17	6.3	0.045	148.7	13.5	30.2	6.46	1.17	3.35	307	6.79	685	31.14	0.119	4.69	1.01	4.64356	164.356	38.9109	0.236747	0.0201807	1.29703	39.3	166	28.6	73	30.3	104	101
18	60863809	28	Survival	gram+	36.1	16	63	No	Female	2	48	167	87	94	39	7.46	0.9	30.4	3	1	21026	13.5	0.046	615.9	10.7	16.9	1.89	0.93	3.86	190	4.35	564	17.64	1.06	11.23	0.91	12.3407	190.11	49.4505	0.260116	0.0223121	1.82927	45	173	14.6	272	24.6	75	109
19	1801488814	28	Survival	gram+	37	17	92	Yes	Male	2	44	149	93	70	39	7.5	1.2	15.3	10	7	32.53	3.5	0.009	152.9	10.7	15.3	3.33	1.93	1.59	153	10.08	273	8.36	0.394	6.49	1.35	4.80741	178.519	32.0741	0.179668	0.00659751	0.80334	43.3	241	15.4	55	53.9	37	33
20	99501867	28	Survival	gram-	36.5	35	116	Yes	Female	3	72	129	82	43	39	7.47	1.8	13	9	10	81.42	1.8	0.026	25.9	10.4	17.3	7.59	1.47	0.54	202	4.98	231	11.98	0.027	7.49	2.43	3.0823	114.403	19.0947	0.166906	0.00194245	1.06912	46.4	278	11.9	38	43.4	6	24
21	60828097	28	Survival	gram-	36.8	20	124	No	Female	3	55	140	94	70	28	7.37	0.94	20.4	2	2	3269	1.7	0.036	32.3	12.5	16.5	3.57	1.09	1.13	382	5.42	211	9.25	0.066	4.18	1.98	2.11111	151.01	24.5455	0.162542	0.00377926	1.32425	48.6	299	18.2	86	36.7	31	29
22	60859490	28	Survival	gram-	38.8	34	134	No	Male	3	72	139	84	79	26	7.33	8.8	28.3	8	12	657.6	9.1	0.218	122221	13.4	21	1.48	1.17	0.54	621	34.06	215	31.61	0.44	16.76	1.05	15.9619	228.571	40.2857	0.17625	0.00225	1.32187	42.3	240	18.2	88	32	29	30
23	60859833	28	Survival	gram-	37.8	24	89	No	Female	3	77	146	98	62	33	7.49	0.9	23.2	8	4	642.7	1.5	0.008	79.4	12.2	17.2	3.69	1.06	0.59	202	5.87	222	14.56	0.418	4.64	0.75	6.18667	129.333	60.1333	0.464948	0.00608247	1.14467	45.1	97	36.5	62	39.4	20	24
24	60844878	28	Survival	gram-	37.6	21	77	No	Male	3	76	91	62	50	34	7.32	3.6	31	11	11	2194	2.7	0.064	75.1	11.4	15.8	2,45	0.99	4.28	729	35.65	235	270.6	0.314	6.82	1.69	4.0355	114.201	35.3254	0.309326	0.0221762	1.70085	59.7	193	15.5	248	35.1	8	15
25	60844091	28	Survival	gram-	36.5	20	74	No	Female	3	75	198	84	70	28	7.44	1.7	18.7	5	2	1417.9	1.6	0.049	17.9	11.29	15.2	4.67	0.97	2.22	105	3.3	323	28.16	9.8	8.8	1.54	5.71429	79.8701	26.2987	0.329268	0.0180488	1.43617	40.5	123	15.3	48	28.2	43	29
26	60807906	28	Survival	gram-	38	15	91	No	Male	3	71	116	88	81	39	7.45	1.2	20.8	4	3	8340	1.9	0.047	52.1	11.1	14.7	2.86	2.06	0.79	387	16.6	315	20.16	9.39	6.72	1.29	5.2093	126.357	37.1318	0.293865	0.00484663	1.74818	47.9	163	19.3	131	27.4	49	21
27	60850974	28	Survival	gram-	36.5	23	159	Yes	Female	3	66	142	67	73	25	7.56	1.3	26	7	7	3709	1.8	0.013	55.5	13	20.3	4.28	1.14	7.93	662	7.36	4571	30.01	0.443	8.14	2.01	4.04975	331.343	22.9851	0.0693694	0.0119069	1.43925	46.2	666	24.7	86	32.1	78	252
28	60849916	28	Survival	gram-	38	21	51	Yes	Male	3	65	157	66	90	33	7.43	1.8	16.2	5	4	27021	6.9	0.074	90.4	13	15.1	7.05	2.14	4.54	458	10.69	296	16.9	5.54	15.19	0.57	26.6491	222.807	90.7018	0.407087	0.035748	1.55723	51.7	127	27.4	121	33.2	20	22
29	60854213	28	Survival	gram-	36.3	17	81	No	Female	3	62	111	76	98	37	7.36	2.4	9.6	4	2	1677	1.7	0.034	32.5	13.8	16.3	6.4	1.21	4.46	283	9.01	369	7.17	0.244	9.3	1.09	8.53211	243.119	43.7615	0.18	0.0168302	1.61149	47.7	265	6.8	134	29.6	66	47
30	60808034	28	Survival	gram-	36.5	29	111	No	Male	3	60	131	87	58	24	7.38	0.9	22.2	11	7	35000	4.2	0.341	109.2	12.5	18.1	4.04	1.09	2.47	527	51.47	251	38.39	0.42	9.58	0.65	14.7385	592.308	60.1538	0.101558	0.00641558	1.1268	39.1	385	11.1	1226	34.7	17	14
31	22239391	28	Survival	gram-	36	43	99	Yes	Female	3	58	119	87	222	31	7.47	2	22.8	8	9	600.8	3.1	0.096	360.7	15.6	18.4	3,40	1.37	3.15	425	23.11	350	33.59	6.13	4.66	1.23	3.78862	111.382	41.2195	0.370073	0.0229927	1.77273	50.7	137	12.4	172	28.6	38	41
32	60826289	28	Survival	gram-	36.8	32	118	Yes	Female	3	58	196	92	52	46	7.28	5.1	17.5	12	10	27.93	4	0.012	103.5	11.9	15.6	7.65	1.03	2.95	306	12.22	237	41.13	0.518	10.23	1.32	7.75	194.697	29.697	0.152529	0.0114786	1.13295	39.2	257	27.7	63	34.6	29	52
33	60851830	28	Survival	gram-	36.8	21	106	No	Female	3	49	132	92	82	33	7.38	3	7.2	7	5	35.27	0.4	0.024	10.3	10.7	15.8	5.96	1.32	0.47	140	2.08	241	176.5	0.139	14.5	0.82	17.6829	392.683	55	0.140062	0.00145963	1.24586	45.1	322	203.1	45	36.2	76	39
34	60840786	28	Survival	gram+	36.8	21	78	No	Female	4	69	178	89	78	28	7.3	4.1	25.4	8	4	157.5	1	0.008	61.2	9.8	17.1	4.54	1.85	1.81	118	4.93	288	10.66	0.634	5.44	0.61	8.91803	132.787	65.4098	0.492593	0.0223457	1.09315	39.9	81	16.8	62	36.5	87	73
35	60808146	28	Survival	gram-	36.5	19	82	No	Female	4	29	98	61	84	36	7.45	1.9	15.7	5	2	13.41	0.6	0.002	28	10.5	17.4	5.02	1.8	3.4	135	3.24	241	27.45	0.118	10.34	1.88	5.5	207.447	26.117	0.125897	0.00871795	1.50153	49.1	390	10.8	44	32.7	14	16
36	60864384	28	Survival	gram-	36.5	21	105	No	Female	4	79	148	81	32	72	7.39	0.9	17.9	17	10	992.4	1.5	0.057	54.7	11.7	18	3.09	1.02	2.32	224	6.54	603	757.6	0.753	10.82	0.52	20.8077	246.154	92.3077	0.375	0.018125	1.35211	48	128	31.4	64	35.5	25	38
37	81221871	28	Survival	gram+	36.1	31	114	No	Male	4	76	163	89	24	91	7.17	2.3	20.2	13	10	2789	1.8	0.039	42.1	16.6	15.3	3.94	1.5	3.77	659	15.45	563	15.43	0.155	14.62	1.37	10.6715	158.394	31.6788	0.2	0.0173733	0.96875	43.4	217	17.7	102	44.8	27	30
38	97382041	28	Survival	gram-	36.8	17	113	No	Female	4	69	144	78	79	49	7.33	9	25.1	9	4	230	1.2	0.021	12.9	13.1	18.2	2.45	1.01	2.26	221	21.34	338	41.94	0.368	19.9	0.69	28.8406	159.42	76.6667	0.480909	0.0205455	1.99623	52.9	110	11	59	26.5	23	32
39	60804488	28	Survival	gram-	37	27	101	Yes	Female	4	64	121	81	51	31	7.5	0.9	26.8	11	10	29.38	1.4	0.836	37.6	12.2	17	3.99	1.07	2.72	72	2.92	170	21.82	0.08	5.73	1.78	3.2191	117.416	23.0899	0.196651	0.0130144	1.23054	41.1	209	11.6	50	33.4	22	26
40	60869120	28	Survival	gram+ and gram-	36.5	21	95	Yes	Female	4	58	128	92	76	37	7.35	2	22.2	11	5	35000	7.8	1.621	254.8	9.8	17.1	3.21	0.84	1.13	462	15.47	462	8.26	0.086	7.17	1.65	4.34545	188.485	25.2727	0.134084	0.00363344	1.37624	41.7	311	7.4	516	30.3	23	23
41	60802494	28	Survival	gram+	37.8	22	99	No	Male	4	45	116	82	93	37	7.45	0.5	24.5	6	8	390.1	2.2	0.028	37.6	12.7	17.2	7.59	1.12	1.2	268	4.45	243	145.2	0.35	11.94	0.79	15.1139	212.658	58.481	0.275	0.00714286	1.13235	46.2	168	29.1	59	40.8	25	26
42	60828094	28	Survival	gram-	36.5	22	90	No	Male	4	44	144	93	146	37	7.44	1.1	18.6	3	4	54.22	1.1	0.012	15.3	10	15.2	6.8	1.86	1.55	207	5.44	253	153.6	8.11	17.07	1.17	14.5897	194.872	34.359	0.176316	0.00679825	1.00249	40.2	228	8.9	48	40.1	32	27
43	60807401	28	Survival	gram+	36.4	22	105	No	Female	4	29	98	56	72	44	7.38	4.6	20.9	12	8	432.5	3.3	0.011	432.5	13	17	5.96	1.14	3.02	227	3.97	297	25.96	0.469	12.12	1.87	6.48128	62.0321	24.385	0.393103	0.0260345	1.72075	45.6	116	10.4	35	26.5	59	69
44	60851940	28	Survival	gram-	36.7	24	109	No	Female	4	25	113	67	90	32	7.42	1.3	21.1	4	5	111.7	2.5	0.035	13.8	11.8	13	7.05	1.03	3.66	292	4.05	248	85.03	4.61	11.3	0.53	21.3208	324.528	76.9811	0.237209	0.0212791	1.24771	40.8	172	18.7	47	32.7	11	17
45	96274542	28	Survival	gram-	38.1	18	105	Yes	Male	4	24	127	59	96	36	7.45	1.1	28.5	4	4	57.29	3.1	0.035	15.1	11.8	15.5	6.45	1.03	1.72	373	4.26	231	82	0.367	16.88	2.76	6.11594	59.4203	15.7971	0.265854	0.0104878	1.16578	43.6	164	19.5	90	37.4	16	19
46	60803787	28	Survival	gram-	39.2	15	111	No	Female	4	20	147	82	91	28	7.53	1.6	23.5	5	6	5.3	1.8	0.305	1198.7	10.9	16.9	2.86	0.94	0.69	385	3.71	389	79.74	0.164	3.9	0.95	4.10526	122.105	41.4737	0.339655	0.00594828	1.15882	39.4	116	13.8	101	34	63	42
47	60800861	28	Survival	gram-	37	18	81	No	Female	5	65	88	54	87	35	7.52	1.7	28.9	10	8	171.9	1.9	0.026	292.1	11	15.7	7.18	0.95	9.81	137	15.88	406	29.53	0.223	11.35	1.58	7.18354	96.8354	26.8354	0.277124	0.0641176	1.42761	42.4	153	19	77	29.7	304	60
48	60822241	28	Survival	gram-	36.3	37	103	No	Female	5	56	114	64	50	90	7.08	6.6	21	16	12	29409	3	0.082	37.9	10.9	17.9	0.63	0.95	1.52	321	8.33	644	16.17	0.055	2.95	0.71	4.15493	233.803	79.8592	0.341566	0.00915663	1.70783	56.7	166	16	43	33.2	38	50
49	81237142	28	Survival	gram-	36.3	22	63	Yes	Female	5	78	113	57	62	21	7.43	1.8	24.9	11	4	1025.9	16.6	0.056	222.2	11.9	15.6	3.61	1.03	3.82	206	5.85	481	25.34	26.21	10.63	0.67	15.8657	204.478	68.5075	0.335036	0.0278832	1.23056	45.9	137	64.4	82	37.3	177	368
50	60868394	28	Survival	gram-	37.3	35	121	Yes	Female	5	71	152	103	54	34	7.52	0.9	17.9	12	15	275	3	0.032	17.1	11.1	16.1	3.04	1.89	4.11	46	4.65	249	120.5	0.138	10.8	1.29	8.37209	227.132	43.5659	0.191809	0.0140273	1.39454	56.2	293	23.1	20	40.3	10	17
51	81224221	28	Survival	gram-	36	40	103	No	Male	5	68	117	70	50	26	7.56	1.1	16.5	13	5	9640	2.1	0.051	33.1	12.1	16.5	1.62	1.05	6.46	534	8.87	313	76.76	0.313	11.29	1.92	5.88021	115.625	24.375	0.210811	0.0290991	1.13869	46.8	222	38.3	75	41.1	34	34
52	81238049	28	Survival	gram-	39.8	42	109	No	Male	5	66	138	89	52	22	7.52	1.8	23.3	13	14	998.5	0.5	0.057	155.7	11.1	15.9	1.01	0.97	8.39	244	13.31	462	121.1	3.14	11.14	1.06	10.5094	117.925	36.1321	0.3064	0.06712	0.804622	38.3	125	28.3	103	47.6	32	33
53	60846674	28	Survival	gram+	38.6	35	138	No	Female	5	65	168	91	56	28	7.38	1.2	16.2	10	7	86.02	5.7	0.05	130.8	10.7	16.5	1.56	0.93	0.36	384	7.01	455	217.5	0.969	10.47	0.9	11.6333	152.222	46.6667	0.306569	0.00262774	1.16667	42	137	26.3	79	36	83	46
54	96390109	28	Survival	gram-	36.6	19	107	Yes	Female	5	62	149	91	60	22	7.43	1.7	19.7	11	2	13110	7.6	0.116	82.8	13.9	14.5	7.65	1.23	1.99	467	19.53	300	56.63	31.38	15.01	0.85	17.6588	162.353	53.0588	0.326812	0.0144203	1.62816	45.1	138	13.8	522	27.7	30	32
55	60845343	28	Survival	gram-	36.8	17	92	No	Male	5	58	114	64	72	20	7.35	2.1	24.4	5	5	17552	6.9	0.223	271.4	13.3	15.1	4.11	1.17	6.12	280	17	342	47.31	2.14	9.85	0.64	15.3906	173.438	75.625	0.436036	0.0551351	1.8403	48.4	111	5.8	304	26.3	26	31
56	1800666854	28	Survival	gram-	37.9	25	104	Yes	Female	5	58	168	98	107	28	7.3	0.6	16.2	7	7	2268	1.2	0.008	70.9	14.6	14.4	2.21	1.29	3.54	436	10.8	197	140.1	7.72	7.95	0.59	13.4746	167.797	70.5085	0.420202	0.0357576	1.63137	41.6	99	22.2	146	25.5	27	28
57	81238378	28	Survival	gram-	36.4	23	112	No	Female	5	58	113	65	48	28	7.21	6.7	19.2	13	9	2921	5.2	0.139	45.7	17.3	18.4	8.53	1.53	7.17	583	12.31	2563	338.3	0.983	10.27	2.08	4.9375	145.192	32.1154	0.221192	0.0237417	2.27211	66.8	302	53.7	59	29.4	2313	3211
58	60829041	28	Survival	gram-	36.5	25	95	No	Female	5	54	133	85	80	26	7.38	1.3	26.9	6	8	2338	0.9	2.006	14.7	14.4	17	0.45	1.28	0.57	507	8.65	128	10.41	0.051	2.56	0.68	3.76471	152.941	65.7353	0.429808	0.00548077	1.57951	44.7	104	22.4	56	28.3	21	21
59	60900443	28	Survival	gram-	37.8	17	87	No	Female	5	40	164	85	84	41	7.5	2.9	20.3	9	5	4752	2.5	0.036	352.2	10.4	17.4	6.13	0.9	1.12	473	23.81	381	21.03	1.17	13.64	1.03	13.2427	231.068	47.8641	0.207143	0.00470588	1.72378	49.3	238	28.6	298	28.6	15	25
60	81235300	28	Survival	gram-	36.1	31	67	No	Female	6	80	142	50	85	26	7.42	1.2	21.3	5	5	565.1	2.8	0.075	54.8	12	15.9	5.63	1.05	1.32	234	3.91	317	38.31	11.71	14.47	0.68	21.2794	189.706	72.2059	0.38062	0.0102326	1.42733	49.1	129	19.9	61	34.4	121	125
61	1800222917	28	Survival	gram-	37.4	30	133	No	Female	6	71	150	81	131	30	7.45	1.7	21.2	9	11	1651	15.1	0.052	123.2	10.3	13.9	1.15	0.89	2.39	423	9.86	273	14.45	0.058	8.66	1.35	6.41481	127.407	32.5185	0.255233	0.0138953	0.950216	43.9	172	41.3	97	46.2	25	25
62	60826318	28	Survival	gram+	39.2	24	98	Yes	Female	6	70	168	85	72	28	7.41	1.5	31.3	13	10	336.7	0.7	0.013	54.3	13.2	16.9	1.39	1.15	3.08	154	5.19	331	85.68	0.45	9.29	1.78	5.2191	140.449	27.0787	0.1928	0.01232	1.67944	48.2	250	27.4	58	28.7	34	73
63	60841583	28	Survival	gram-	36	22	99	No	Female	6	69	162	98	49	53	7.42	1.3	22.1	6	7	734.9	0.7	0.122	18.9	12.6	17.6	1.4	1.1	8.67	145	4.15	146	140.4	0.138	6.38	1.7	3.75294	334.706	31.4706	0.0940246	0.0152373	1.90391	53.5	569	13.9	66	28.1	14	26
64	81236796	28	Survival	gram+	36.1	23	96	No	Female	6	65	145	91	82	21	7.39	2.7	21.3	6	3	633.9	1.9	0.008	87.1	19.3	16.2	6.04	1.71	11.17	465	16.87	573	510.4	3.35	5.27	1.06	4.9717	192.453	39.1509	0.203431	0.0547549	1.1008	41.5	204	54	97	37.7	299	507
65	1800613940	28	Survival	gram+	36.6	23	69	No	Female	6	57	96	59	75	31	7.51	1.1	23.3	5	9	270.1	0.9	1.032	28.7	11.1	14.7	4.53	0.96	9.38	75	3.6	305	11.38	0.052	6.93	0.84	8.25	248.81	47.2619	0.189952	0.0448804	1.55686	39.7	209	16.9	52	25.5	28	23
66	96033363	28	Survival	gram-	37.9	23	100	Yes	Female	6	57	133	78	98	25	7.43	1.9	20.3	3	4	61.29	0.6	0.004	18.3	13.2	14.8	1.15	1.16	1.42	124	2.33	206	119.6	0.15	5.38	0.93	5.78495	507.527	47.7419	0.0940678	0.00300847	1.80488	44.4	472	9.6	58	24.6	45	45
67	80100165	28	Survival	gram+	36.8	22	75	Yes	Female	6	54	163	82	79	31	7.45	0.9	22.7	9	3	1023	3.9	0.096	67.4	10.6	14.9	0.76	0.91	4.99	381	10.13	267	38.49	45.63	7.88	0.65	12.1231	180	72.3077	0.401709	0.0426496	1.50641	47	117	12.7	123	31.2	25	24
68	60896125	28	Survival	gram-	37.1	26	86	No	Male	6	51	97	63	97	24	7.39	3.3	23.6	11	8	285.4	2.6	0.002	371.6	13.5	13.9	1.75	1.19	16	93	4.18	569	47.11	0.332	3.19	0.94	3.39362	136.17	47.0213	0.345313	0.125	1.48822	44.2	128	34.6	30	29.7	31	69
69	60829819	28	Survival	gram+	36.5	24	122	Yes	Male	6	51	82	54	73	21	7.31	6.8	25.3	4	9	349.7	8.8	0.041	22.7	12.3	15.4	4.02	1.47	3.68	236	15.85	154	89.82	0.468	22.71	2.62	8.66794	124.046	16.374	0.132	0.0113231	1.26176	42.9	325	15.4	76	34	14	16
70	60858323	28	Survival	gram+	36.3	15	85	No	Female	6	50	131	90	58	47	7.46	0.7	24	14	2	23183	1.5	0.042	26.1	12.5	17.9	2.07	1.09	1.65	252	5.12	244	34.64	0.055	2.99	0.68	4.39706	226.471	77.9412	0.344156	0.0107143	1.82131	53	154	20.1	84	29.1	18	16
71	95859051	28	Survival	gram-	36.1	19	86	No	Female	6	43	135	85	129	23	7.46	1.1	29.8	5	2	745.3	1.6	0.021	48.5	13.6	15.8	7.05	1.18	2.95	507	14.84	217	57.72	26.53	23.45	0.64	36.6406	64.0625	62.0312	0.968293	0.0719512	0.652961	39.7	41	16	98	60.8	17	18
72	80463830	28	Survival	gram-	37.8	17	109	Yes	Female	6	36	115	82	55	31	7.47	1.3	20.4	13	3	516.1	0.6	0.001	55.7	12.2	15.9	4.22	1.06	5.13	435	18.84	324	168.9	0.733	1.97	0.24	8.20833	695.833	322.917	0.464072	0.0307186	2.07219	77.5	167	15.3	300	37.4	9	20
73	60857815	28	Survival	gram+	37.8	23	83	No	Male	6	35	94	55	133	24	7.55	1.4	22	5	7	16.85	0.3	0.001	12	12.6	19.3	2.63	1.1	1.1	159	3.75	304	8.9	0.415	5.02	0.75	6.69333	181.333	53.2	0.293382	0.00808824	0.959135	39.9	136	14.4	73	41.6	58	54
74	60827726	28	Survival	gram+	36.2	33	114	Yes	Female	6	34	200	165	56	27	7.34	3.6	28.4	18	9	35000	1	0.068	85	13.6	15.2	5.83	1.19	13.12	402	23.9	307	38.26	1.23	5.21	1.28	4.07031	160.156	33.5938	0.209756	0.064	1.22857	43	205	14.2	687	35	22	32
75	60804392	28	Survival	gram+	36.5	26	95	No	Female	6	15	120	71	99	30	7.51	0.6	24.3	3	6	511.4	5.8	0.01	17.6	11.7	14	3.91	1.02	4.63	450	4.12	316	42.59	2.83	10.18	0.67	15.194	476.119	54.1791	0.113793	0.0145141	1.1672	36.3	319	10.4	39	31.1	21	14
76	60854888	28	Survival	gram-	38.2	29	110	Yes	Male	7	38	114	83	123	27	7.18	15	23.1	9	9	2307	1	0.012	19.4	12.5	12.8	1.68	1.1	0.63	315	5.78	253	477.7	0.254	20.65	0.57	36.2281	315.789	87.7193	0.277778	0.0035	1.68919	50	180	22.6	50	29.6	26	17
77	60857773	28	Survival	gram-	36.8	23	97	No	Female	7	65	170	117	159	22	7.19	0.7	21.7	9	7	417.2	4.7	0.012	164.7	12.4	14.7	2.29	1.08	2.04	184	10.86	288	44.76	0.097	12.96	1.49	8.69799	177.181	28.9262	0.163258	0.00772727	1.29819	43.1	264	14.6	31	33.2	41	42
78	1800921316	28	Survival	gram+	38.2	30	42	No	Female	7	60	86	53	50	15	7.56	1.2	23.2	20	15	23183	8.8	0.096	371.6	18.2	17.9	6.27	1.42	8.12	450	18.84	398	32.72	0.331	8.55	1.76	4.85795	69.8864	38.5795	0.552033	0.0660163	3.41206	67.9	123	11.9	304	19.9	27	20
79	60868631	28	Survival	gram-	36.8	32	114	No	Male	7	56	163	102	59	32	7.55	1.5	26.4	5	9	1116	2.3	0.11	51.1	13	15	8.52	1.13	3.78	128	0.78	186	9.58	0.404	3.24	0.85	3.81176	223.529	47.4118	0.212105	0.0198947	1.31699	40.3	190	14.5	28	30.6	35	22
80	60834686	28	Survival	gram-	36.6	31	107	No	Female	7	56	116	79	57	48	7.36	0.9	26.4	11	8	68.09	0.9	0.007	21.1	12.5	16	0.69	1.1	8.78	138	6.85	214	205.8	0.124	7.74	1.22	6.34426	182.787	38.5246	0.210762	0.0393722	1.13527	47	223	33.6	59	41.4	9	20
81	60864154	28	Survival	gram-	37.6	19	110	No	Female	7	56	110	70	98	18	7.51	1.3	32.3	5	3	104.9	3.1	0.041	46.3	10.8	14.9	4.66	0.93	2.51	232	9.65	337	778.3	0.3	10.19	1.18	8.63559	291.525	36.0169	0.123547	0.00729651	1.21777	42.5	344	25.7	98	34.9	8	22
82	60804090	28	Survival	gram-	36.5	34	98	No	Male	7	52	186	86	78	39	7.49	1.2	22.3	8	5	12891	12.7	9.778	82.5	10.9	16.1	7.35	0.94	2.36	361	7.26	716	82.57	23.66	15.85	1.47	10.7823	208.163	26.8027	0.128758	0.00771242	1.25879	39.4	306	17.4	84	31.3	24	75
83	60877793	28	Survival	gram+	37	37	145	No	Female	7	47	117	70	59	20	7.29	11.6	12.2	19	8	2333	9.5	0.044	456.7	16.7	17.6	9.11	1.51	6.4	248	17.31	374	184	0.773	4.16	1.03	4.03883	487.379	41.165	0.0844622	0.012749	1.53069	42.4	502	122	248	27.7	31	45
84	1801243995	28	Survival	gram-	36.7	27	160	No	Male	7	44	110	76	134	31	7.61	4.3	23.1	8	12	754.3	0.5	0.008	23.5	10.9	15.3	6.8	0.95	5.05	632	20.33	396	27.96	2.03	21.41	2.14	10.0047	93.4579	21.4486	0.2295	0.02525	0.952282	45.9	200	36.9	222	48.2	232	100
85	60092320	28	Survival	gram-	36.6	45	94	Yes	Female	7	38	114	80	54	42	7.4	1	6.9	10	5	98.95	2.4	0.007	20.1	12	16.2	1.01	1.05	0.14	311	3.76	246	8.69	0.137	14.99	0.65	23.0615	356.923	60.9231	0.17069	0.000603448	1.04762	39.6	232	22.7	59	37.8	13	23
86	60807236	28	Survival	gram-	37.9	24	109	No	Female	7	35	101	64	67	20	7.41	1.5	22.9	6	5	403.2	3.2	4.025	13.7	13.8	16.2	3.91	1.21	11.08	253	4.35	227	183.5	5.35	16.1	0.85	18.9412	305.882	48.7059	0.159231	0.0426154	1.33548	41.4	260	24.9	92	31	50	21
87	95980910	28	Survival	gram-	37.7	31	113	No	Female	8	60	216	105	32	29	7.45	1.9	17.2	9	7	750.1	1.6	0.009	30.7	11.4	16.7	3.4	0.99	4.32	508	6.61	437	811.2	0.282	12.59	1.67	7.53892	131.138	29.7605	0.226941	0.019726	1.51064	49.7	219	21	116	32.9	25	22
88	60803702	28	Survival	gram+	35.9	21	85	No	Female	8	36	149	84	87	24	7.38	1.4	20.8	5	5	405.8	1.1	10.003	16.1	11.9	17.7	5.55	1.03	1.98	134	2.75	357	190	0.096	3.9	0.74	5.27027	182.432	57.4324	0.314815	0.0146667	1.45548	42.5	135	10.6	51	29.2	33	48
89	1801469785	28	Survival	gram-	36.2	49	133	Yes	Female	8	78	98	48	80	30	7.33	13.8	22.7	5	10	14831	96.8	22.072	3948	14.2	14.9	0.89	1.25	0.83	389	15.88	169	90.21	3.12	12.36	1.54	8.02597	130.519	29.0909	0.222886	0.00412935	1.22071	44.8	201	16.6	284	36.7	8	23
90	60829447	28	Survival	gram+	37.2	22	82	Yes	Female	8	73	97	62	87	23	7.45	1.4	25.4	6	12	2875	1.5	3.01	17.8	13.7	18.7	1.31	1.21	2.2	221	10.27	107	42.36	12.05	7.71	0.66	11.6818	116.667	91.9697	0.788312	0.0285714	2.15248	60.7	77	17.1	38	28.2	35	38
91	60787886	28	Survival	gram-	36	15	68	No	Male	8	68	122	74	63	40	7.41	0.8	22.1	6	3	300.5	1.5	0.004	25	12.7	14.9	0.78	1.12	0.77	90	1.67	177	74.5	0.119	2.51	1.19	2.10924	163.025	33.6975	0.206701	0.00396907	1.27302	40.1	194	28.1	47	31.5	20	38
92	60801373	28	Survival	gram+	37.7	42	138	No	Female	8	63	137	97	53	36	7.42	1.8	27.1	11	11	2403	2.3	0.098	33.7	13.3	13.3	2.92	1.17	12.2	185	5.36	681	29.63	0.075	14.16	0.82	17.2683	237.805	51.9512	0.218462	0.0625641	1.18333	42.6	195	14.8	45	36	22	26
93	96933168	28	Survival	gram-	36.5	27	83	Yes	Female	8	58	156	84	77	27	7.38	1.1	20.6	5	5	25684	6.9	2.162	187.2	12.2	15.7	1.21	1.07	1.98	814	6.84	354	12.93	0.11	4.67	0.76	6.14474	307.895	49.3421	0.160256	0.00846154	1.25839	37.5	234	6.3	185	29.8	15	17
94	60859690	28	Survival	gram-	36.6	23	105	No	Female	8	55	115	81	80	24	7.33	1.9	27.3	3	7	304.4	1.7	0.011	13.9	11.8	15.9	0.98	1.03	2.13	94	4.28	184	101.7	0.126	3.69	1.82	2.02747	115.385	29.9451	0.259524	0.0101429	2.18876	54.5	210	11.5	34	24.9	16	11
95	60892666	28	Survival	gram+	36.6	16	66	No	Female	8	55	120	76	69	28	7.4	3	25.9	5	2	112.3	0.6	0.001	9.1	11.9	17.5	4.21	1.04	0.64	255	4.76	291	18.21	0.072	5.86	1.59	3.68553	240.252	23.3962	0.0973822	0.00167539	0.997319	37.2	382	13.2	69	37.3	33	21
96	60848007	28	Survival	gram+	37.6	22	71	No	Male	8	52	149	76	112	38	7.49	1.3	11.6	3	7	412.3	0.9	0.005	41.9	11.4	16.8	2.98	0.99	0.34	300	3.91	289	16.34	0.05	9.39	1.02	9.20588	186.275	36.4706	0.195789	0.00178947	0.837838	37.2	190	26.3	55	44.4	31	27
97	60868830	28	Survival	gram+	36.6	28	91	No	Male	8	49	150	83	114	25	7.43	1.3	21	6	5	35000	5.9	0.122	398.3	16.6	17.7	7.59	1.46	1.82	618	22.53	884	71.96	24.25	8.21	1.18	6.95763	107.627	49.0678	0.455906	0.0143307	1.82075	57.9	127	16.3	400	31.8	17	57
98	60854163	28	Survival	gram-	36.3	35	136	No	Male	8	44	130	78	87	25	7.39	7.6	30.6	8	10	1272	1.9	0.026	71.2	11	16.8	0.62	1.89	10.95	796	22.28	2505	80.66	0.311	14.92	0.57	26.1754	142.105	72.1053	0.507407	0.135185	0.962529	41.1	81	62	145	42.7	1727	1114
99	60827204	28	Survival	gram+	36.5	11	63	No	Female	9	79	93	40	33	67	7.11	6.7	37.7	7	5	6228	0.9	0.027	98.4	12.9	16.2	3.87	1.13	1.63	277	8.59	219	107.9	0.134	13.72	0.86	15.9535	193.023	59.186	0.306627	0.00981928	1.54242	50.9	166	18.9	92	33	14	22
100	60809261	28	Survival	gram+	36.8	33	149	Yes	Female	9	75	106	74	62	37	7.29	3.4	24	11	11	7059	8.7	0.709	254.2	11.5	14.9	1.7	1.63	6.8	427	16.41	441	109.1	22.34	6.38	0.78	8.17949	48.7179	58.7179	1.20526	0.178947	1.81746	45.8	38	18.8	162	25.2	32	38
101	60850326	28	Survival	gram+	36	18	92	No	Male	9	64	60	39	89	34	7.42	1.9	23.4	8	10	1649	6.1	0.044	2382.6	14.2	17.5	2.83	1.25	14.54	434	16.63	333	74.9	65.12	10.41	0.58	17.9483	125.862	67.7586	0.538356	0.199178	1.27597	39.3	73	56	259	30.8	112	166
102	22847567	28	Survival	gram+	36.7	20	115	Yes	Male	9	38	143	104	113	28	7.34	1	26.3	4	4	247	2.6	0.006	28.6	11.3	18.8	2.89	0.98	0.08	508	5.74	382	21.48	0.1	9.91	1.62	6.11728	205.556	31.1111	0.151351	0.00024024	0.852792	50.4	333	22.9	128	59.1	6	21
103	94677502	28	Survival	Fungus	36.8	41	151	No	Female	10	61	118	71	22	53	7.39	5.3	13.1	10	8	67.67	1.5	0.002	16.9	11.7	19.2	0.68	1.02	4.38	192	4.73	182	92.77	0.8	4.05	2.77	1.46209	65.343	16.7509	0.256354	0.0241989	1.61111	46.4	181	26.4	34	28.8	33	43
104	60815819	28	Survival	Fungus	36.5	22	75	No	Female	10	42	164	84	90	21	7.43	2.1	23.9	4	5	2032	1.9	0.005	31.4	14.7	17.7	3.94	1.31	8.51	195	5.56	132	78.47	0.094	2.76	1.13	2.44248	236.283	46.1947	0.195506	0.0318727	1.9262	52.2	267	13.5	105	27.1	4	18
105	96534571	28	Survival	gram+	38.4	32	114	No	Female	10	68	106	75	68	19	7.55	1	25.1	10	9	442.4	62.1	0.911	188.9	10.2	13.4	0.99	0.88	2.26	393	9.18	544	215.9	8.86	17.21	1.07	16.0841	85.0467	40.2804	0.473626	0.0248352	1.75203	43.1	91	21	79	24.6	40	92
106	60848927	28	Survival	gram+	37.7	31	138	No	Female	10	65	131	77	77	23	7.39	2.4	23.3	5	8	2598	1.9	0.031	18.5	13.3	13.7	6.27	1.17	11.48	137	8	339	127.3	4.33	31.08	1.05	29.6	232.381	44	0.189344	0.0470492	1.2	46.2	244	19.5	57	38.5	15	31
107	60897896	28	Survival	Fungus	36.2	21	89	Yes	Male	10	57	105	77	60	31	7.24	4.2	30.5	4	8	618.2	0.7	3.009	6.6	15	15.6	4.11	1.3	2.23	134	2.46	349	125.7	0.157	8.79	0.67	13.1194	182.09	117.761	0.646721	0.0182787	3.14343	78.9	122	18.1	33	25.1	24	27
108	95631792	28	Survival	Fungus	39.6	24	90	No	Female	10	54	108	60	78	19	7.52	1.3	26.2	6	7	992.4	0.9	0.008	40.6	12.4	17.5	2.8	1.08	8.37	174	4.32	447	188.8	0.839	4.43	0.5	8.86	220	82.2	0.373636	0.0760909	1.42215	41.1	110	18.7	66	28.9	86	65
109	99408737	28	Survival	gram+	36.8	37	155	Yes	Male	10	41	104	56	43	21	7.62	0.7	20.8	10	12	928.5	2.9	0.162	189.9	10.8	13.3	2.58	0.93	7.25	123	15.39	517	977.9	4.19	20.45	2.39	8.55649	90.3766	18.7448	0.207407	0.0335648	2.14354	44.8	216	34.8	126	20.9	37	53
110	60858392	28	Survival	gram+	36	25	101	No	Male	10	37	154	104	53	27	7.43	1.3	27.3	10	6	226	2.6	0.016	40.9	12.5	14.1	3.85	1.1	16	142	10.3	700	125.9	1.18	15.68	2.77	5.66065	61.0108	16.065	0.263314	0.0946746	1.64207	44.5	169	166.4	64	27.1	34	49
111	60832837	28	Survival	gram-	36.4	18	88	No	Male	11	76	169	84	157	29	7.53	1.9	29	5	2	2344	5.7	0.077	94.2	11.7	13.6	1.73	1.02	4.44	43	3.08	463	511	2.61	17.41	0.94	18.5213	264.894	41.9149	0.158233	0.0178313	1.28758	39.4	249	390.3	18	30.6	136	207
112	60843952	28	Survival	gram+	36.5	34	138	No	Male	12	66	134	74	74	37	7.5	1.4	20.9	7	11	396.5	176.3	0.338	2709.6	11.8	17	0.91	1.03	1.89	326	6.52	1419	900.5	1.11	27.21	3.96	6.87121	75.2525	15.5051	0.20604	0.00634228	2.1773	61.4	298	20.9	81	28.2	118	180
113	1800980387	28	Survival	gram+	39.4	33	118	No	Female	12	66	173	90	32	31	7.21	5.6	20.8	13	9	1161	9	0.074	352.3	14.4	22.7	0.67	1.28	0.81	262	21.7	747	401.4	9.09	11.6	0.61	19.0164	386.885	71.9672	0.186017	0.0034322	1.74206	43.9	236	28.7	118	25.2	467	697
114	60855205	28	Survival	gram+	38.1	40	142	No	Male	12	61	115	75	31	52	7.22	12.5	22	7	12	2421	6.5	0.061	106.9	11.7	16.8	3.98	1.02	15	450	18.66	298	100.4	5.18	32.69	2.94	11.119	114.966	15.9864	0.139053	0.0443787	2.47368	47	338	15.1	90	19	14	18
115	60845422	28	Survival	gram-	38.5	26	122	Yes	Female	12	53	112	65	138	32	7.53	1.8	23.1	4	11	131.8	5.2	0.029	62	11.5	16.8	4.55	1	2.73	112	4.06	425	245.7	1.37	7.51	0.76	9.88158	142.105	65.2632	0.459259	0.0252778	1.78417	49.6	108	23.2	44	27.8	39	27
116	60878478	28	Survival	gram-	37.1	18	86	No	Male	12	51	121	79	69	40	7.48	1	24	7	2	499	78.3	0.042	1719.9	12.1	13.7	2.71	1.06	1.74	572	12.28	263	57.13	34.47	20.12	1.05	19.1619	354.286	40.8571	0.115323	0.00467742	1.30793	42.9	372	12.9	29	32.8	40	41
117	81237612	28	Survival	Fungus	36.2	16	100	No	Female	13	79	142	68	45	13	7.62	0.3	28.7	11	5	6427	15.8	0.14	2087.3	12	15.5	3.09	1.14	4.26	498	29.73	241	28.79	0.514	14.73	0.52	28.3269	251.923	135.577	0.538168	0.0325191	2.49117	70.5	131	40.7	145	28.3	33	27
118	60847784	28	Survival	Fungus	39.1	18	135	No	Female	13	52	157	101	92	47	7.47	1	22	8	7	1053	48.7	0.395	5435	11.3	14.6	0.78	0.98	4.66	246	9.28	1453	819.3	29.95	11.01	0.62	17.7581	216.129	78.0645	0.361194	0.0347761	1.23155	48.4	134	23.7	95	39.3	109	337
119	1800685903	28	Survival	gram+	36.8	23	108	Yes	Male	13	49	86	54	136	42	7.42	1.9	27.2	6	7	407.3	3.9	0.035	22.6	13.5	15.4	0.91	1.19	2.01	461	9.96	368	226.6	25.89	24.97	1.85	13.4973	193.514	25.4054	0.131285	0.00561453	1.54098	47	358	27.9	81	30.5	53	25
120	60801891	28	Survival	gram+	38.2	30	134	No	Female	13	42	124	77	183	35	7.51	0.9	19.6	5	12	1122	2.7	0.036	350.7	11.9	13.9	1.56	1.03	5.37	129	5.17	457	125.2	3.56	7.34	0.91	8.06593	329.67	51.2088	0.155333	0.0179	1.37463	46.6	300	39.8	61	33.9	311	125
121	60565152	28	Survival	gram+	36.2	31	97	Yes	Male	14	29	125	78	91	27	7.52	4.9	20.4	6	8	828.6	14.8	4.039	340.8	14.4	16.3	2.9	1.28	5.83	289	11.1	777	58.8	26.83	6.52	0.71	9.1831	147.887	77.6056	0.524762	0.0555238	1.91986	55.1	105	19.7	96	28.7	51	69
122	81118346	28	Survival	gram-	36.7	21	99	No	Female	14	73	143	86	112	35	7.46	1	21.9	7	7	244.9	1.4	0.012	23.2	11.2	17.8	7.65	0.97	1.41	249	7.47	271	23.69	0.088	6.03	1.34	4.5	81.3433	35.9701	0.442202	0.0129358	1.82576	48.2	109	17.6	74	26.4	43	31
123	60856771	28	Survival	gram-	36.8	20	82	Yes	Female	14	61	98	63	99	17	7.5	1.6	23.1	3	6	6709	44.9	5.737	141.1	11.1	17.2	1.25	0.96	2.45	174	7.72	422	144.2	73.53	8.55	0.67	12.7612	162.687	57.1642	0.351376	0.0224771	1.27243	38.3	109	14.1	51	30.1	48	152
124	60834840	28	Survival	gram+	37.6	21	98	No	Male	14	58	152	99	58	39	7.52	1.7	5.7	14	4	2954	4.8	0.072	89.3	10.8	13.5	2.35	0.94	5.09	185	7.15	397	208.8	1.76	7.74	0.85	9.10588	97.6471	54.4706	0.557831	0.0613253	1.94538	46.3	83	23.7	37	23.8	39	50
125	60892505	28	Survival	gram+	36.9	31	71	Yes	Female	14	48	117	70	79	21	7.47	1.2	11.2	10	7	6427	15.8	0.395	5435	11.3	15.5	1.67	0.98	4.26	498	29.73	340	8.31	0.417	7.11	0.68	10.4559	150	71.0294	0.473529	0.0417647	1.9243	48.3	102	10.8	51	25.1	20	32
126	60864001	28	Survival	gram+	38.3	30	121	Yes	Male	15	66	152	103	84	30	7.23	3.8	32.8	3	8	244.9	3.9	0.035	22.6	13.5	15.4	1.64	1.19	2.01	249	7.47	204	16.78	0.108	11.46	1.44	7.95833	301.389	29.3056	0.097235	0.00463134	1.20917	42.2	434	16	48	34.9	22	24
127	81224703	28	Survival	gram-	36.7	24	101	No	Male	16	78	163	89	110	22	7.4	1.9	19.2	5	11	226	2.6	0.016	40.9	12.5	14.1	0.71	1.1	16	142	10.3	212	408.7	0.133	8.62	0.63	13.6825	420.635	68.0952	0.161887	0.0603774	1.18837	42.9	265	32.9	78	36.1	22	35
128	60830537	28	Survival	gram+	36.2	21	103	No	Female	17	79	146	76	144	27	7.5	0.9	20.9	3	4	112.3	0.6	1.001	9.1	12.2	15.7	5.95	1.07	1.98	156	3.89	147	185.3	2.83	15.01	0.55	27.2909	112.727	100.727	0.893548	0.0319355	2.10646	55.4	62	18.1	69	26.3	9	14
129	60807236	28	Survival	gram-	36.4	24	89	Yes	Female	17	57	141	68	89	29	7.45	2.4	29.3	3	4	226.4	1.5	0.346	15.3	13.6	15.7	4.67	0.98	2.44	348	10.21	529	31.4	1.93	10.33	0.75	13.7733	480	56.9333	0.118611	0.00677778	1.85652	42.7	360	21.9	49	23	116	160
130	96718453	28	Survival	gram+	36.8	30	110	No	Female	19	54	155	76	80	25	7.39	3.1	22.1	7	8	131.8	4.8	0.395	22.6	9.8	15.4	8.36	1.1	1.58	235	3.44	579	48.39	0.745	8.24	2.14	3.85047	25.7009	25.7009	1	0.0287273	2.0073	55	55	71.6	58	27.4	41	43
131	60875280	28	Survival	gram-	36.2	20	103	No	Female	19	40	122	77	94	20	7.45	1.8	26.6	7	2	121.3	3.1	1.003	16.2	14.3	14.7	4.42	1.12	2.33	435	7.31	244	684.7	2.45	2.57	0.99	2.59596	165.657	43.7374	0.264024	0.0142073	1.53004	43.3	164	30.1	34	28.3	22	23
132	80758838	28	Survival	gram+	36.7	25	98	No	Male	20	57	130	74	88	20	7.41	1.7	18.4	7	5	1456.7	1.1	0.023	17.8	15.2	14.8	0.79	0.98	5.56	459	19.2	440	25.34	40.96	3.52	0.92	3.82609	151.087	59.0217	0.390647	0.04	1.93238	54.3	139	14	879	28.1	13	22
133	60804398	28	Survival	gram-	36.1	23	90	No	Male	21	58	126	58	98	26	7.43	2.1	29.6	6	4	226	2.6	0.072	6.6	15	15.6	4.15	1.3	2.23	129	3.23	356	18.68	7.16	15.83	0.61	25.9508	159.016	73.2787	0.460825	0.0229897	1.40125	44.7	97	57.7	59	31.9	32	72
134	60827081	28	Survival	gram-	36.5	20	110	No	Female	22	33	124	77	85	29	7.42	1.5	5.7	7	2	2478.5	3.56	0.578	10.2	16.7	17.3	7.18	1.02	4.21	445	31.2	230	114.2	1.7	4.81	0.87	5.52874	106.897	44.2529	0.413978	0.0452688	1.8599	38.5	93	40	35	20.7	32	23
135	60804308	28	Survival	gram+	38.9	27	102	No	Female	23	68	156	84	79	24	7.38	3.4	23.7	3	9	145.1	0.71	3.002	12.4	15.6	16.4	1.72	1	2.11	231	3.41	313	47.32	0.068	15.38	0.86	17.8837	337.209	56.5116	0.167586	0.00727586	1.65306	48.6	290	13.2	46	29.4	62	73
136	60894715	28	Survival	gram+ and gram-	36.7	19	101	Yes	Female	24	34	114	64	79	28	7.41	2.6	26.3	3	2	785.3	1.21	0.349	6.4	15.3	17.6	1.06	1.05	1.12	423	4.44	231	24.53	2.34	17.76	1.91	9.29843	127.749	23.2984	0.182377	0.00459016	1.28613	44.5	244	13.6	64	34.6	97	21
137	60787691	28	Survival	gram+ and gram-	36.1	34	135	No	Female	25	69	145	87	84	29	7.36	3.8	29.3	14	12	5478.3	34.24	12.3	34.67	17.1	18.3	4.81	1.36	4.67	349	5.7	4185	16.06	34.43	12.87	1.57	8.19745	156.051	28.9172	0.185306	0.0190612	1.22372	45.4	245	40.3	193	37.1	1474	2020
138	60853112	28	Survival	gram+	37	35	92	Yes	Female	25	68	114	83	76	17	7.67	0.6	5.7	10	7	6982.3	13.56	0.983	23.67	15.8	17.2	3.28	1.01	14.67	332	12.1	143	41.3	62.19	4.66	0.61	7.63934	286.885	75.082	0.261714	0.0838286	1.77519	45.8	175	22.2	68	25.8	31	34
139	60802875	28	Survival	gram-	36	23	70	Yes	Female	27	71	138	89	89	23	7.41	3.5	12.4	3	5	2589.1	10.1	1.342	26.22	16.3	16.7	3.27	1.24	7.98	479	16.9	402	12.3	0.069	5.55	0.88	6.30682	305.682	51.8182	0.169517	0.0296654	1.6	45.6	269	23.7	52	28.5	15	53
140	60802865	28	Survival	gram+	37.2	21	107	Yes	Female	28	67	158	74	78	21	7.28	7.9	29.9	10	7	12437.8	4.89	3.56	25.78	17.2	18.4	3.1	1.21	4.56	230	5.45	204	48.76	4.26	5.81	0.47	12.3617	421.277	114.468	0.271717	0.0230303	1.56395	53.8	198	19	300	34.4	9	23
141	95843175	28	Survival	gram+ and gram-	36.3	23	115	No	Male	28	68	123	77	85	23	7.44	1.2	25.1	9	8	14831	3.1	2.162	37.2	12.2	14.3	4.21	1.07	10.2	185	5.36	277	15.87	0.221	15.64	0.75	20.8533	417.333	50.1333	0.120128	0.0325879	1.38745	37.6	313	60.1	50	27.1	48	43
142	97875021	1	Dead	gram+ and gram-	39	23	145	No	Female	1	63	67	43	89	19	7.33	6.1	27	20	14	9683	8.8	0.152	3304.8	13	18.9	3.05	2.17	12.76	356	10.97	476	945.7	38.57	14.26	0.57	25.0175	164.912	73.6842	0.446809	0.135745	1.44828	42	94	24.9	176	29	44	51
143	60831392	1	Dead	gram-	36.3	18	80	Yes	Female	1	58	132	84	64	28	7.5	1.5	20.4	4	1	2980	2.2	0.043	100.5	13.2	14.8	5.64	2.56	7.99	402	9.83	231	11.37	3.81	10.15	0.6	16.9167	275	78.1667	0.284242	0.0484242	1.83922	46.9	165	18	84	25.5	24	34
144	60857642	2	Dead	gram+	37	23	98	No	Female	2	76	128	88	142	19	7.38	2.1	13.9	5	4	17723	2.7	0.055	184.2	19.7	19	2.35	1.76	13.38	486	26.5	414	24.62	0.085	10.13	0.71	14.2676	139.437	63.5211	0.455556	0.135152	1.19312	45.1	99	44	170	37.8	246	203
145	60896907	2	Dead	gram-	36.7	22	102	No	Female	2	70	173	118	139	30	7.32	0.8	18.5	15	11	23205	16.5	0.052	159	16.5	15.7	1.67	1.47	4.15	981	55.37	208	112.2	8.84	11.62	0.37	31.4054	402.703	141.892	0.352349	0.0278523	2.23404	52.5	149	14.3	444	23.5	61	23
146	60853053	2	Dead	gram+	36.6	34	114	No	Female	2	69	160	95	191	42	7.48	1.6	30.8	9	8	1420	2.8	0.034	30	21	15.9	1.64	2.86	20.21	434	6.69	293	14.83	0.046	5.57	1.8	3.09444	89.4444	24.9444	0.278882	0.125528	1.03218	44.9	161	22.3	74	43.5	26	26
147	81146358	28	Dead	gram-	36.6	18	123	Yes	Male	2	39	136	85	60	24	7.23	0.6	23.2	13	10	217.8	2.7	0.06	166.68	13	16.4	0.71	1.13	9.12	387	7.28	754	177.7	17.62	36	1.68	21.4286	44.0476	22.9167	0.52027	0.123243	1.19565	38.5	74	9.7	93	32.2	9	21
148	60896914	3	Dead	gram-	39.3	32	108	Yes	Female	3	80	95	54	32	34	7.21	4.6	35.6	22	14	35000	18.7	0.428	1936.2	16.4	17	5.95	1.43	16.12	1152	36.67	568	139.1	8.48	10.39	0.27	38.4815	214.815	221.852	1.03276	0.277931	2.11661	59.9	58	66.8	207	28.3	186	68
149	60896274	3	Dead	gram-	38.7	37	139	No	Female	3	35	165	96	51	36	7.56	7.6	25	15	15	6128	5	0.133	83.9	16.3	13.5	4.67	1.99	60.23	437	18.27	424	284.1	0.329	12.62	0.57	22.1404	194.737	75.9649	0.39009	0.542613	1.43377	43.3	111	15.8	87	30.2	19	33
150	81235648	26	Dead	gram-	38.5	29	83	No	Male	3	80	105	50	54	28	7.25	10	19	17	13	3265	2.1	0.301	122.8	21.3	15.8	8.36	0.98	12.63	98	19.8	474	50.58	0.618	3.69	0.32	11.5312	212.5	154.375	0.726471	0.185735	2.375	49.4	68	10.2	106	20.8	38	40
151	F234052702	3	Dead	gram+	36	40	114	No	Female	3	72	171	86	56	31	7.54	7.8	20.5	20	10	35000	12.8	3.069	3131	13	19.3	4.42	1.14	71.48	570	34.77	762	69.15	2.48	22.64	0.67	33.791	73.1343	78.9552	1.07959	1.45878	2.03462	52.9	49	24.4	140	26	27	60
152	60895485	3	Dead	gram-	36.2	43	102	Yes	Male	3	66	133	63	43	28	7.43	0.9	24	11	8	1845	1.8	0.032	116.3	12	16.9	0.79	1.05	20.76	565	14.85	238	251.9	4.22	14.76	0.73	20.2192	287.671	55.3425	0.192381	0.0988571	1.24691	40.4	210	13.4	257	32.4	20	22
153	60828562	10	Dead	gram-	36.8	28	91	Yes	Female	3	65	117	60	95	39	7.45	7	20.5	21	9	28087	3.5	0.361	410.6	13.7	19.4	4.15	1.2	6.53	497	20.57	930	143.7	0.206	10.35	0.3	34.5	123.333	162	1.31351	0.176486	1.42941	48.6	37	49.9	348	34	1146	460
154	95482266	4	Dead	gram-	36	34	150	No	Female	4	75	178	93	94	34	7.36	2.7	23.6	16	11	35000	18.1	0.825	47.9	13.2	17.3	7.18	1.15	3.89	359	16.86	312	200.5	8.29	39.27	3.72	10.5565	15.3226	13.9516	0.910526	0.0682456	1.42975	51.9	57	23.4	172	36.3	17	36
155	60869034	4	Dead	gram-	37.6	22	98	Yes	Female	4	35	130	90	113	32	7.47	1.3	28.9	6	5	223.6	2	0.008	35.2	10.9	17.7	2.07	0.94	11.64	203	4.86	329	34.9	0.054	3.73	0.87	4.28736	196.552	51.3793	0.261404	0.0680702	0.6783	44.7	171	12	54	65.9	12	22
156	80240107	4	Dead	gram-	38	29	108	Yes	Female	4	80	96	51	68	68	7.51	4.1	26.2	17	12	8107	3.1	0.142	195.8	14.2	15.9	4.79	1.26	6.83	304	11.45	491	266.2	0.598	8.29	1.02	8.12745	193.137	41.6667	0.215736	0.0346701	1.68651	42.5	197	17.7	136	25.2	49	74
157	99354876	4	Dead	gram-	36.1	25	93	No	Male	4	79	126	58	54	21	7.11	8.9	19.5	17	9	832.3	5.4	0.047	399	19.5	25.7	0.61	2.31	3.87	409	24.9	307	95.34	15.71	11.25	4.29	2.62238	10.2564	9.90676	0.965909	0.0879545	1.91441	42.5	44	7.4	640	22.2	43	43
158	60902552	16	Dead	gram+	36.3	16	74	No	Male	4	72	163	70	60	25	7.25	7.1	31.7	14	5	4541	2.7	0.007	67.1	20.3	16.4	6.83	0.9	14.81	400	31.44	210	19.53	0.58	8.4	3.23	2.60062	17.6471	14.0867	0.798246	0.259825	1.21658	45.5	57	12.7	559	37.4	10	17
159	60890400	4	Dead	gram+	36.5	35	107	Yes	Female	4	25	177	98	72	28	7.53	0.9	18.7	13	6	1543	1	0.017	71.4	10.3	16.7	4.64	0.89	25.39	227	8.68	234	10.03	0.252	10.35	2.83	3.65724	13.0742	14.417	1.1027	0.686216	1.46237	40.8	37	10.4	54	27.9	35	34
160	60876820	5	Dead	gram+	37.8	29	109	Yes	Female	5	67	95	53	46	17	7.6	0.5	15	25	9	35000	25	1.187	9040	15	27.4	5.61	1.32	16.08	449	41.79	653	65.4	325.1	13.32	1.01	13.1881	30.6931	51.2871	1.67097	0.51871	1.62382	51.8	31	428.5	335	31.9	65	94
161	60892561	5	Dead	gram-	36.6	21	68	Yes	Female	5	51	119	67	121	48	7.48	0.8	16.4	5	4	906.5	4.7	0.027	87.6	12.3	16	1.65	1.07	14.42	572	30.17	181	45.68	0.608	7.95	0.7	11.3571	115.714	108.714	0.939506	0.178025	1.99738	76.1	81	13.3	282	38.1	88	72
162	60857004	5	Dead	gram-	36.6	15	69	No	Female	5	80	100	55	51	34	7.45	0.9	24.6	10	4	459.2	0.7	0.001	24.3	13.7	16.8	6.55	1.04	15.2	181	7.5	213	11.72	0.052	3.61	1.54	2.34416	40.2597	27.3377	0.679032	0.245161	1.01446	42.1	62	18.1	86	41.5	54	83
163	60847580	5	Dead	gram-	36	16	60	No	Female	5	55	64	36	102	39	7.42	2.6	35.5	10	8	210.2	4.4	0.022	33.7	11.5	18.3	2.07	2.21	11.8	340	7.03	180	7.57	0.049	7.38	2.42	3.04959	40.4959	19.3388	0.477551	0.120408	1.19084	46.8	98	13.6	77	39.3	18	25
164	60854095	27	Dead	gram+	38.7	25	130	No	Female	5	79	106	51	41	42	7.62	7.7	22.4	17	13	2280	2.7	0.308	354	14.1	18.5	1.22	1.23	7.79	373	23.81	660	519.8	0.898	5.42	0.27	20.0741	277.778	245.926	0.885333	0.103867	2.44118	66.4	75	28.1	123	27.2	20	60
165	W130091003	5	Dead	gram+	37	20	102	No	Female	5	80	163	80	34	34	7.51	3.9	22.2	15	3	851	2.1	0.028	51	13.8	16	1.01	1.21	25.87	389	14.36	599	48.48	0.228	17.38	0.93	18.6882	109.677	81.9355	0.747059	0.253627	2.18338	76.2	102	30.1	129	34.9	12	40
166	60636030	5	Dead	gram-	38	22	95	Yes	Female	5	68	148	86	50	22	7.45	2.4	21.6	15	11	301.2	15.7	0.014	1180.4	11.2	13.7	0.88	0.97	24.11	350	6.81	313	149.5	4.34	14.29	0.38	37.6053	310.526	96.8421	0.311864	0.204322	1.06358	36.8	118	19.9	54	34.6	21	26
167	60808905	6	Dead	gram-	36.4	25	130	Yes	Male	6	55	85	62	121	37	7.48	2	24.2	4	10	1126	2.9	0.02	306.5	14.6	16.1	1.31	1.29	14.39	346	9.67	221	20.46	0.089	8.38	2.63	3.18631	38.403	17.5285	0.456436	0.142475	1.50163	46.1	101	20.7	136	30.7	43	34
168	60890226	6	Dead	gram+	36.5	16	92	Yes	Female	6	69	164	92	136	12	7.7	1.2	31	9	5	35000	6.4	0.063	69.7	18.2	18.6	1.25	1.93	5.99	361	19.44	146	41.68	0.492	11.89	0.87	13.6667	62.069	66.4368	1.07037	0.110926	1.75684	57.8	54	26.6	224	32.9	23	30
169	81235349	6	Dead	gram-	36.5	12	101	No	Female	6	69	122	94	83	57	7.46	0.7	24.3	11	4	560.9	2.2	0.008	67.1	12.3	17	1.03	1.08	5.69	176	7.78	182	20.35	0.045	7.42	0.57	13.0175	108.772	82.9825	0.762903	0.0917742	1.40356	47.3	62	13.3	31	33.7	23	26
170	60869018	6	Dead	gram+	36.3	34	94	Yes	Female	6	64	84	53	59	80	7.43	3.5	20.6	12	11	13369	2	0.156	120.5	12.9	14.4	1.66	1.13	2.57	464	10.37	1381	153.2	0.403	8.33	0.96	8.67708	142.708	62.6042	0.438686	0.0187591	2.22593	60.1	137	18.7	95	27	191	225
171	1801052458	6	Dead	gram+	38.2	35	121	No	Male	6	64	139	77	69	15	7.4	0.8	20.3	18	13	290.2	22.4	0.044	316.6	18.7	13.8	0.16	1.1	61.29	509	40.34	583	61.65	0.204	15.73	0.82	19.1829	363.415	53.7805	0.147987	0.205671	1.43648	44.1	298	18.8	774	30.7	21	34
172	60809760	12	Dead	gram-	36	32	108	No	Female	6	45	147	88	37	84	7.06	15	38.1	15	12	1291	4.7	0.027	13.1	10.6	16.4	0.57	0.92	12.28	241	6.8	409	45.75	0.095	21.15	1.39	15.2158	30.2158	42.8777	1.41905	0.292381	1.58511	59.6	42	17.7	18	37.6	46	49
173	60890265	7	Dead	gram+	36.9	22	138	Yes	Female	7	33	148	103	86	19	7.53	0.8	31.3	6	9	53.52	2.5	0.023	37.1	14.8	17.5	2.01	1.32	4.44	403	9.58	542	684	1.09	15.58	1.28	12.1719	114.062	33.9844	0.297945	0.030411	1.46959	43.5	146	40	107	29.6	189	53
174	60868216	7	Dead	gram-	36.6	17	89	Yes	Female	7	71	118	69	23	32	7.5	2.1	22.8	8	3	536.6	1.1	0.001	13.6	16.1	17.3	2.98	1.42	8.12	156	5.61	208	7.69	0.047	11.86	0.64	18.5312	623.438	67.8125	0.108772	0.0203509	1.43709	43.4	399	10.7	47	30.2	24	24
175	60828619	7	Dead	Fungus	36.4	20	85	Yes	Male	7	53	107	67	107	33	7.46	1	23.2	7	3	676.1	3.6	0.014	99.2	17.7	14.9	1.23	2.52	3.09	363	10.76	545	37.38	70.76	5.94	0.62	9.58065	179.032	69.0323	0.385586	0.0278378	1.11458	42.8	111	54.7	93	38.4	225	166
176	60829354	7	Dead	gram-	36.5	20	98	Yes	Female	7	24	102	66	37	35	7.49	0.8	22.1	11	3	15866	1.5	0.047	27.2	16.8	17.7	1.31	1.48	31.17	575	7.12	575	28.68	0.314	4.41	1.12	3.9375	236.607	55.625	0.235094	0.117623	1.50483	62.3	265	39.6	63	41.4	28	28
177	60902497	8	Dead	gram+	38.1	30	120	No	Male	8	68	80	54	34	23	7.11	5.8	21.3	14	17	23904	3.3	0.373	166.3	12.8	16.6	5.31	1.13	12.75	476	13.68	316	341.8	0.291	10.01	0.56	17.875	294.643	69.4643	0.235758	0.0772727	1.27961	38.9	165	27.2	87	30.4	20	45
178	95608317	8	Dead	gram+	37.2	34	115	Yes	Male	8	78	108	66	53	33	7.47	2.5	20.4	17	14	2146	3.1	0.053	438.4	13.1	14.9	1.05	1.15	20.21	441	28.86	194	173.6	3.25	9.56	1.67	5.72455	74.2515	30.5988	0.412097	0.162984	2.18376	51.1	124	22	458	23.4	16	42
179	60892248	12	Dead	gram-	36.1	31	67	No	Female	8	65	142	50	45	22	7.35	4.5	23.4	8	5	691	1.1	0.04	30	23.6	17.9	4.02	2.52	20.5	296	4.79	317	331.2	0.979	13.06	3.06	4.26797	42.1569	13.9869	0.331783	0.158915	1.24419	42.8	129	19.9	61	34.4	121	125
180	96914237	10	Dead	gram-	36.2	38	76	No	Male	10	31	112	35	143	13	7.3	11.2	18.3	9	8	11896	4.5	29.44	837.6	19.6	25.8	2.07	1.72	61.67	525	59.1	993	458.2	1.43	27.9	0.98	28.4694	41.8367	58.2653	1.39268	1.50415	2.2749	57.1	41	126.4	228	25.1	570	818
181	60853885	11	Dead	gram+	37.5	19	89	No	Female	11	79	104	61	63	32	7.49	1	27.2	8	6	1951	0.6	0.027	36.2	12.5	16.6	7.05	1.1	8.08	133	2.91	592	41.92	0.714	10.34	0.53	19.5094	277.358	101.698	0.366667	0.054966	2.27426	53.9	147	19.4	45	23.7	35	54
182	1801371815	12	Dead	gram-	36.4	16	89	No	Female	12	30	123	77	112	31	7.56	4.3	23.4	6	6	47.53	13.4	0.009	100.7	64	29.3	4.22	2.76	6.57	71	1.43	326	24.95	0.239	4.98	1.65	3.01818	66.6667	27.4545	0.411818	0.0597273	1.3811	45.3	110	339.4	61	32.8	2198	247
183	60806041	12	Dead	gram+	39	42	177	Yes	Female	12	15	127	72	56	21	7.34	4.1	26.9	14	15	11896	4.5	29.44	837.6	19.6	25.8	2.63	1.72	61.67	393	9.18	3729	46.06	1.44	49.29	1.17	42.1282	81.1966	40.9402	0.504211	0.649158	1.80755	47.9	95	25.9	45	26.5	57	159
184	97422171	13	Dead	gram-	36.7	28	159	Yes	Male	13	79	115	78	78	42	7.44	1.9	24.4	3	9	120.3	4	0.042	39.5	11.7	16.6	5.83	1.02	12.63	342	15.18	408	46.12	0.148	11.57	2.67	4.33333	13.8577	17.0412	1.22973	0.341351	1.46774	45.5	37	19.7	50	31	25	31
185	1801050808	15	Dead	gram+	36.8	20	108	Yes	Female	15	72	138	66	30	24	7.36	4.2	15.8	12	2	3972	1.7	0.354	28.9	19.8	15.1	3.91	0.84	17.36	518	31.22	843	51.37	0.543	4.65	0.89	5.22472	66.2921	53.2584	0.80339	0.294237	1.56954	47.4	59	10.8	136	30.2	20	47
186	97945790	16	Dead	gram-	39.2	33	114	Yes	Male	16	75	85	52	56	38	7.46	1.4	23.6	14	15	25684	6.9	2.162	187.2	12.2	15.7	1.68	1.07	19.7	814	6.84	213	67.42	0.366	6.39	0.48	13.3125	104.167	118.333	1.136	0.394	1.91892	56.8	50	24.9	35	29.6	62	50
187	60899844	16	Dead	gram+	36.5	26	40	No	Female	16	62	96	51	76	27	7.36	3.3	24.8	13	14	14831	96.8	22.072	3448	14.2	14.9	2.29	1.25	8.82	389	15.88	345	17.62	0.489	7.1	1.22	5.81967	95.082	41.3934	0.435345	0.0760345	1.44286	50.5	116	21.5	123	35	26	20
188	60841312	22	Dead	gram-	38.5	33	64	No	Female	16	62	110	70	31	17	7.56	1.1	24	13	15	112.3	0.6	0.001	9.1	11.9	17.5	6.27	1.04	10.64	255	4.76	184	9.15	0.338	3.33	1.04	3.20192	83.6538	40.3846	0.482759	0.122299	0.680713	42	87	10.9	33	61.7	63	41
189	60787047	16	Dead	gram-	36.1	28	113	No	Female	16	49	77	56	33	21	7.31	3.1	18.9	14	13	244.9	1.4	0.395	23.2	11.2	13.5	8.52	2.97	5.09	129	7.15	200	19.95	0.04	11.93	1.33	8.96992	54.8872	38.1203	0.694521	0.069726	1.13423	50.7	73	23.5	45	44.7	33	25
190	60891677	17	Dead	gram-	39.1	29	36	No	Female	17	79	60	39	43	17	7.56	0.7	25.8	17	16	25673	46.75	10.92	367.2	17.2	19.2	0.69	1.34	24.1	562	17.31	254	65.64	1.32	16.16	0.5	32.32	242	79	0.326446	0.199174	1.02067	39.5	121	23	274	38.7	12	22
191	60854476	20	Dead	gram-	38.4	33	143	No	Female	20	55	67	43	35	30	7.21	5.8	28.7	13	15	31017.1	189.3	25.3	201.4	18.9	20.57	3.05	1.44	34.56	578	16.79	354	65.34	2.25	16.02	1.02	15.7059	87.2549	38.2353	0.438202	0.388315	0.874439	39	89	18.1	55	44.6	29	22
192	60858213	21	Dead	gram+	36.6	23	114	No	Female	21	79	78	56	56	21	7.35	4.4	22.8	14	12	2809.4	30.3	5.67	50.7	15.2	18.2	5.64	1.23	17.88	346	20.17	399	32.5	0.429	16.27	1.92	8.47396	102.083	27.7604	0.271939	0.0912245	2.51415	53.3	196	12.5	412	21.2	32	39
193	60902666	21	Dead	gram+	38.4	30	121	No	Male	21	65	113	65	43	22	7.4	2.8	29.1	18	14	4678.3	10.3	4.1	15.2	14.8	17.3	2.35	0.99	3.33	245	5.67	269	135.8	4.22	20.15	0.43	46.8605	274.419	121.395	0.442373	0.0282203	2.02326	52.2	118	14.6	523	25.8	41	43
194	96362254	21	Dead	gram+	36.4	33	101	No	Female	21	56	145	87	70	19	7.58	1.1	29.2	9	8	14831	96.8	10.92	367.2	12.2	15.7	1.67	2.07	8.82	479	23.11	273	19.03	1.95	19.45	1.56	12.4679	48.7179	33.0769	0.678947	0.116053	2.064	51.6	76	18.9	100	25	143	61
195	60787642	23	Dead	gram-	39.4	33	143	Yes	Female	23	58	78	51	24	27	7.45	4.6	25.2	20	16	3457.3	5.75	0.783	19.2	14.3	16.9	1.64	1.34	40.2	428	30.2	575	11.05	96.51	12.53	1.05	11.9333	32.381	38.4762	1.18824	1.18235	1.62249	40.4	34	16.5	1124	24.9	100	64
196	60806617	28	Dead	gram+	36.1	32	134	No	Male	28	77	56	42	56	29	7.34	5.3	28	10	13	10315.6	25.79	12.58	44.27	15.7	18.9	0.71	2.42	16.79	472	27.3	800	47.87	0.602	8.61	0.58	14.8448	403.448	72.5862	0.179915	0.0717521	1.21676	42.1	234	60.9	143	34.6	21	53
197	1801376391	9	Dead	gram+	39.3	33	120	No	Female	9	54	89	53	40	24	7.33	5.6	29.6	13	15	4721.8	5.2	0.983	10.2	15	15.6	5.95	2.3	22.1	359	7.88	307	40.62	0.086	13.57	1.28	10.6016	68.75	41.3281	0.601136	0.251136	1.34264	52.9	88	13.5	58	39.4	17	26
198	97225458	12	Dead	gram-	36.2	22	93	Yes	Female	9	70	90	54	46	19	7.54	1.1	24.3	14	10	12379.3	13.56	2.162	6.6	15.2	14.8	4.67	1.98	5.56	129	3.23	206	37.13	0.093	6.79	1.22	5.56557	106.557	52.459	0.492308	0.0427692	2.37918	64	130	12.8	41	26.9	25	25
199	81224778	20	Dead	gram-	36.3	10	40	Yes	Female	14	37	67	43	27	29	7.47	0.7	10.3	13	12	2367.8	25.79	10.92	10.2	14.3	16.9	8.36	1.34	40.2	423	30.2	356	51.24	0.246	10.98	0.82	13.3902	115.854	50.3659	0.434737	0.423158	1.13462	41.3	95	15.3	51	36.4	244	84
200	60847625	18	Dead	gram+	38.5	24	132	Yes	Male	18	24	120	74	66	29	7.35	4.3	21.1	13	13	4589.4	5.5	0.578	12.4	17.2	18.4	10.52	1.21	14.56	230	5.45	757	39.93	12.94	12.63	0.93	13.5806	139.785	50.4301	0.360769	0.112	1.53268	46.9	130	20.6	68	30.6	118	130
201	60877473	28	Dead	Fungus	37	15	116	No	Female	19	59	105	50	56	21	7.37	4.1	18.9	11	7	6781.4	6.1	0.072	13.4	15.3	17.6	5.79	2.05	10.2	359	5.36	356	145	2.53	6.44	1.07	6.01869	99.0654	42.0561	0.424528	0.0962264	2.12264	45	106	12.5	76	21.2	32	39
[truncated: 6 more columns]

## Sheet: Categorical data
Outcome	Gender	Hypertension	diabetes mellitus	ALF	AHI	AKI	ALI	pathogene	ICU		Characteristics	0(N=141)	1(N=60)	Total(N=201)	pvalue	FDR
Survival	Female	Yes	No	No	No	No	No	gram-	No		ALI				0.14	0.14
Survival	Female	Yes	No	No	No	Yes	No	gram-	No		No	97(48.26%)	34(16.92%)	131(65.17%)
Survival	Female	Yes	Yes	Yes	No	No	Yes	gram+	Yes		Yes	44(21.89%)	26(12.94%)	70(34.83%)
Survival	Male	No	Yes	No	No	No	Yes	gram-	Yes		AHI				0.08	0.08
Survival	Male	No	No	No	No	No	No	gram-	No		No	118(58.71%)	43(21.39%)	161(80.10%)
Survival	Male	No	No	No	Yes	No	No	gram+	No		Yes	23(11.44%)	17(8.46%)	40(19.90%)
Survival	Female	No	No	No	No	No	No	gram-	Yes		AKI				0.01	0.02
Survival	Male	Yes	No	No	No	Yes	Yes	gram-	No		No	106(52.74%)	34(16.92%)	140(69.65%)
Survival	Female	Yes	No	Yes	No	No	No	gram+	No		Yes	35(17.41%)	26(12.94%)	61(30.35%)
Survival	Female	Yes	No	No	No	No	No	gram-	No		ALI				0.0076	0.02
Survival	Female	Yes	No	No	No	No	No	gram-	Yes		No	104(51.74%)	32(15.92%)	136(67.66%)
Survival	Female	No	No	Yes	No	Yes	Yes	gram-	Yes		Yes	37(18.41%)	28(13.93%)	65(32.34%)
Survival	Male	No	No	No	No	No	No	gram-	No
Survival	Male	Yes	No	Yes	Yes	No	Yes	gram-	No		gender				0.39	1
Survival	Female	No	No	No	No	No	No	gram+	No		Male	48(23.88%)	16(7.96%)	64(31.84%)
Survival	Male	No	No	No	No	No	No	gram+	No		Female	93(46.27%)	44(21.89%)	137(68.16%)
Survival	Female	Yes	No	Yes	No	No	No	gram-	No
Survival	Female	No	No	Yes	Yes	Yes	No	gram+	No		Hypertension				0.34	0.68
Survival	Male	No	No	No	No	No	No	gram+	Yes		No	75(37.31%)	37(18.41%)	112(55.72%)
Survival	Female	No	No	No	No	No	No	gram-	Yes		Yes	66(32.84%)	23(11.44%)	89(44.28%)
Survival	Female	Yes	Yes	Yes	No	No	No	gram-	No		Diabetes				0.48	0.68
Survival	Male	No	Yes	No	No	No	No	gram-	No		No	102(50.75%)	47(23.38%)	149(74.13%)
Survival	Female	Yes	No	No	No	No	No	gram-	No		Yes	39(19.40%)	13(6.47%)	52(25.87%)
Survival	Male	Yes	Yes	Yes	No	Yes	No	gram-	No
Survival	Female	No	Yes	No	No	No	No	gram-	No		pathogene				0.99	0.99
Survival	Male	Yes	Yes	Yes	No	No	No	gram-	No		gram+	52(25.87%)	24(11.94%)	76(37.81%)
Survival	Female	Yes	No	Yes	No	Yes	No	gram-	Yes		gram-	79(39.30%)	33(16.42%)	112(55.72%)
Survival	Male	Yes	No	No	No	Yes	Yes	gram-	Yes		gram+ and gram-	4(1.99%)	1(0.50%)	5(2.49%)
Survival	Female	No	No	No	No	No	No	gram-	No		Fungus	6(2.99%)	2(1.00%)	8(3.98%)
Survival	Male	Yes	Yes	Yes	No	Yes	No	gram-	No
Survival	Female	No	No	No	No	Yes	Yes	gram-	Yes		ICU				0.09	0.09
Survival	Female	Yes	No	No	No	No	No	gram-	Yes		No	97(48.26%)	33(16.42%)	130(64.68%)
Survival	Female	Yes	No	No	Yes	No	No	gram-	No		Yes	44(21.89%)	27(13.43%)	71(35.32%)
Survival	Female	Yes	Yes	No	No	No	No	gram+	No
Survival	Female	No	No	No	No	No	No	gram-	No
Survival	Female	Yes	No	Yes	No	No	No	gram-	No
Survival	Male	Yes	No	Yes	No	No	Yes	gram+	No
Survival	Female	No	No	No	No	No	No	gram-	No
Survival	Female	Yes	Yes	No	No	No	Yes	gram-	Yes
Survival	Female	Yes	Yes	Yes	No	Yes	No	gram+ and gram-	Yes
Survival	Male	No	No	No	No	No	No	gram+	No
Survival	Male	No	No	No	No	No	No	gram-	No
Survival	Female	No	No	No	No	No	No	gram+	No
Survival	Female	No	No	No	No	No	No	gram-	No
Survival	Male	No	No	No	No	No	No	gram-	Yes
Survival	Female	No	No	No	No	No	No	gram-	No
Survival	Female	No	No	No	No	No	Yes	gram-	No
Survival	Female	No	No	Yes	No	No	Yes	gram-	No
Survival	Female	No	No	No	Yes	No	No	gram-	Yes
Survival	Female	Yes	No	No	No	No	Yes	gram-	Yes
Survival	Male	Yes	No	Yes	No	No	Yes	gram-	No
Survival	Male	No	No	No	No	No	No	gram-	No
Survival	Female	No	Yes	Yes	No	No	No	gram+	No
Survival	Female	Yes	Yes	No	No	Yes	No	gram-	Yes
Survival	Male	Yes	No	Yes	No	Yes	No	gram-	No
Survival	Female	No	Yes	No	No	No	No	gram-	Yes
Survival	Female	No	No	Yes	Yes	No	Yes	gram-	No
Survival	Female	No	No	Yes	No	No	No	gram-	No
Survival	Female	No	No	No	No	Yes	No	gram-	No
Survival	Female	Yes	No	Yes	Yes	No	No	gram-	No
Survival	Female	Yes	Yes	No	No	No	No	gram-	No
Survival	Female	Yes	No	No	No	No	No	gram+	Yes
Survival	Female	Yes	No	No	No	No	Yes	gram-	No
Survival	Female	No	No	No	Yes	Yes	No	gram+	No
Survival	Female	Yes	No	No	No	No	No	gram+	No
Survival	Female	No	No	No	No	No	No	gram-	Yes
Survival	Female	Yes	Yes	No	No	Yes	Yes	gram+	Yes
Survival	Male	No	No	No	No	No	No	gram-	No
Survival	Male	Yes	No	No	No	No	No	gram+	Yes
Survival	Female	Yes	Yes	Yes	No	No	No	gram+	No
Survival	Female	Yes	No	No	No	No	No	gram-	No
Survival	Female	Yes	No	No	No	Yes	Yes	gram-	Yes
Survival	Male	No	No	No	No	No	No	gram+	No
Survival	Female	Yes	No	Yes	No	Yes	No	gram+	Yes
Survival	Female	No	No	No	No	No	No	gram+	No
Survival	Male	Yes	No	No	No	Yes	No	gram-	Yes
Survival	Female	No	No	Yes	No	No	Yes	gram-	No
Survival	Female	Yes	Yes	Yes	No	Yes	No	gram+	No
Survival	Male	Yes	Yes	No	No	No	No	gram-	No
Survival	Female	No	No	No	No	No	No	gram-	No
Survival	Female	No	No	Yes	Yes	No	No	gram-	No
Survival	Male	Yes	Yes	No	No	No	No	gram-	No
Survival	Female	No	No	Yes	Yes	Yes	Yes	gram+	No
Survival	Male	No	No	No	Yes	No	No	gram-	No
Survival	Female	No	No	No	No	No	No	gram-	Yes
Survival	Female	No	No	No	No	No	No	gram-	No
Survival	Female	Yes	Yes	No	No	No	No	gram-	No
Survival	Female	Yes	No	No	No	No	No	gram+	No
Survival	Female	No	Yes	Yes	Yes	Yes	Yes	gram-	Yes
Survival	Female	No	No	No	Yes	No	No	gram+	Yes
Survival	Male	No	No	Yes	No	No	No	gram-	No
Survival	Female	No	No	Yes	No	No	Yes	gram+	No
Survival	Female	Yes	Yes	Yes	No	Yes	No	gram-	Yes
Survival	Female	No	Yes	No	No	No	Yes	gram-	No
Survival	Female	No	Yes	No	No	No	No	gram+	No
Survival	Male	Yes	Yes	No	No	No	No	gram+	No
Survival	Male	No	No	Yes	No	Yes	No	gram+	No
Survival	Male	No	No	No	Yes	Yes	No	gram-	No
Survival	Female	Yes	No	Yes	No	No	Yes	gram+	No
Survival	Female	Yes	No	Yes	No	Yes	No	gram+	Yes
Survival	Male	Yes	Yes	No	Yes	No	No	gram+	No
Survival	Male	No	Yes	No	No	No	No	gram+	Yes
Survival	Female	No	No	No	No	No	Yes	Fungus	No
Survival	Female	Yes	Yes	Yes	Yes	Yes	No	Fungus	No
Survival	Female	No	No	No	No	No	No	gram+	No
Survival	Female	No	No	No	No	No	No	gram+	No
Survival	Male	No	No	No	No	No	Yes	Fungus	Yes
Survival	Female	No	No	No	No	No	No	Fungus	No
Survival	Male	Yes	No	No	No	Yes	Yes	gram+	Yes
Survival	Male	Yes	No	No	No	No	No	gram+	No
Survival	Male	Yes	Yes	No	Yes	No	No	gram-	No
Survival	Male	No	No	Yes	Yes	No	Yes	gram+	No
Survival	Female	Yes	No	No	No	No	No	gram+	No
Survival	Male	Yes	Yes	Yes	No	Yes	Yes	gram+	No
Survival	Female	No	No	No	No	No	Yes	gram-	Yes
Survival	Male	No	No	No	No	No	No	gram-	No
Survival	Female	No	Yes	Yes	No	Yes	Yes	Fungus	No
Survival	Female	Yes	No	No	Yes	No	Yes	Fungus	No
Survival	Male	No	No	No	Yes	No	No	gram+	Yes
Survival	Female	Yes	No	No	No	No	Yes	gram+	No
Survival	Male	No	No	Yes	No	No	No	gram+	Yes
Survival	Female	No	Yes	No	No	Yes	Yes	gram-	No
Survival	Female	No	Yes	No	No	No	No	gram-	Yes
Survival	Male	No	No	Yes	No	No	No	gram+	No
Survival	Female	No	No	No	No	No	Yes	gram+	Yes
Survival	Male	Yes	Yes	No	No	No	No	gram+	Yes
Survival	Male	Yes	Yes	No	No	No	No	gram-	No
Survival	Female	Yes	No	No	No	No	No	gram+	No
Survival	Female	Yes	No	No	No	No	No	gram-	Yes
Survival	Female	Yes	No	No	Yes	No	No	gram+	No
Survival	Female	No	No	No	No	No	No	gram-	No
Survival	Male	No	No	Yes	No	Yes	No	gram+	No
Survival	Male	No	No	No	Yes	No	No	gram-	No
Survival	Female	No	No	Yes	No	Yes	No	gram-	No
Survival	Female	Yes	No	No	No	No	Yes	gram+	No
Survival	Female	No	No	No	No	No	No	gram+ and gram-	Yes
Survival	Female	Yes	No	No	Yes	Yes	Yes	gram+ and gram-	No
Survival	Female	No	Yes	No	No	No	No	gram+	Yes
Survival	Female	Yes	No	Yes	No	Yes	Yes	gram-	Yes
Survival	Female	Yes	Yes	Yes	No	Yes	No	gram+	Yes
Survival	Male	No	Yes	No	No	No	No	gram+ and gram-	No
Dead	Female	No	No	No	No	No	Yes	gram+ and gram-	No
Dead	Female	Yes	Yes	No	No	No	No	gram-	Yes
Dead	Female	Yes	Yes	No	Yes	Yes	No	gram+	No
Dead	Female	Yes	No	Yes	No	Yes	Yes	gram-	No
Dead	Female	Yes	Yes	Yes	No	No	No	gram+	No
Dead	Male	No	Yes	No	No	No	No	gram-	Yes
Dead	Female	Yes	No	Yes	Yes	Yes	No	gram-	Yes
Dead	Female	Yes	No	No	No	Yes	Yes	gram-	No
Dead	Male	No	No	No	No	No	No	gram-	No
Dead	Female	Yes	No	No	No	Yes	Yes	gram+	No
Dead	Male	Yes	Yes	Yes	No	No	Yes	gram-	Yes
Dead	Female	No	No	No	Yes	Yes	No	gram-	Yes
Dead	Female	No	No	Yes	Yes	Yes	Yes	gram-	No
Dead	Female	Yes	No	No	No	No	No	gram-	Yes
Dead	Female	Yes	Yes	No	No	No	Yes	gram-	Yes
Dead	Male	Yes	No	Yes	No	No	No	gram-	No
Dead	Male	Yes	Yes	Yes	No	Yes	No	gram+	No
Dead	Female	No	No	No	No	No	No	gram+	Yes
Dead	Female	No	Yes	Yes	No	Yes	Yes	gram+	Yes
Dead	Female	No	No	No	No	No	No	gram-	Yes
Dead	Female	No	Yes	No	No	No	No	gram-	No
Dead	Female	Yes	No	Yes	No	No	No	gram-	No
Dead	Female	No	No	Yes	No	No	No	gram+	No
Dead	Female	Yes	No	No	Yes	Yes	Yes	gram+	No
Dead	Female	No	No	No	No	No	Yes	gram-	Yes
Dead	Male	No	No	Yes	No	Yes	No	gram-	Yes
Dead	Female	No	No	Yes	No	Yes	No	gram+	Yes
Dead	Female	No	No	No	No	No	No	gram-	No
Dead	Female	Yes	No	Yes	Yes	Yes	Yes	gram+	Yes
Dead	Male	No	No	No	No	Yes	Yes	gram+	No
Dead	Female	No	No	Yes	Yes	No	Yes	gram-	No
Dead	Female	No	No	No	Yes	Yes	No	gram+	Yes
Dead	Female	No	No	No	No	No	Yes	gram-	Yes
Dead	Male	No	No	Yes	No	No	No	Fungus	Yes
Dead	Female	No	No	Yes	Yes	No	No	gram-	Yes
Dead	Male	Yes	Yes	No	No	No	Yes	gram+	No
Dead	Male	Yes	No	Yes	Yes	Yes	Yes	gram+	Yes
Dead	Female	Yes	No	No	No	No	No	gram-	No
Dead	Male	No	No	Yes	Yes	Yes	Yes	gram-	No
Dead	Female	No	No	Yes	No	No	No	gram+	No
Dead	Female	No	No	No	Yes	No	Yes	gram-	No
Dead	Female	No	No	No	Yes	Yes	No	gram+	Yes
Dead	Male	No	No	No	No	No	No	gram-	Yes
Dead	Female	Yes	No	Yes	No	Yes	No	gram+	Yes
Dead	Male	No	No	No	No	No	No	gram-	Yes
Dead	Female	Yes	Yes	Yes	No	Yes	No	gram+	No
Dead	Female	No	No	No	No	No	Yes	gram-	No
Dead	Female	No	No	No	No	No	Yes	gram-	No
Dead	Female	Yes	Yes	Yes	No	Yes	No	gram-	No
Dead	Female	No	Yes	No	Yes	Yes	Yes	gram-	No
Dead	Female	No	No	No	No	No	Yes	gram+	No
Dead	Male	Yes	No	No	No	Yes	Yes	gram+	No
Dead	Female	No	No	No	No	Yes	No	gram+	No
Dead	Female	Yes	No	Yes	Yes	No	Yes	gram-	Yes
Dead	Male	No	No	Yes	Yes	Yes	No	gram+	No
Dead	Female	No	No	No	No	No	Yes	gram+	No
Dead	Female	No	No	Yes	No	No	No	gram-	Yes
Dead	Female	No	No	No	No	No	Yes	gram-	Yes
Dead	Male	No	No	No	Yes	No	Yes	gram+	Yes
Dead	Female	No	No	Yes	No	Yes	Yes	Fungus	No

## Sheet: ROC Curve
time	Outcome	SOFA	INR	D-DI	D-DI/PLT	PLT				Results
28	Survival	14	1.91	5.52	0.0254378	217				Index	SOFA	INR	D-DI	D-DI/PLT	PLT
28	Survival	18	1.41	2.6	0.0150289	173				AUC	78.4279	69.0957	89.6395	93.9007	81.318
28	Survival	5	1.02	1.59	0.00981481	162				Best Cut-off Value	11.5	1.195	5.54	0.0675951	161.5
28	Survival	3	0.98	2.58	0.00781818	330				Sensitivity	61.6667	61.6667	86.6667	81.6667	83.3333
28	Survival	7	1.05	3.55	0.0163594	217				Specificity	85.1064	71.6312	75.8865	94.3262	65.9574
28	Survival	3	1.03	1.2	0.0101695	118				Negative Predictive Value	83.9161	81.4516	93.0435	92.3611	90.2913
28	Survival	2	0.91	2.44	0.0125128	195				Positive Predictive Value	63.7931	48.0519	60.4651	85.9649	51.0204
28	Survival	10	1.06	4.63	0.0140303	330				True Positive Rate	61.6667	61.6667	86.6667	81.6667	83.3333
28	Survival	6	2.06	2.64	0.0231579	114				False Positive Rate	14.8936	28.3688	24.1135	5.67376	34.0426
28	Survival	11	1.17	3.5	0.0207101	169				True Negatice Rate	85.1064	71.6312	75.8865	94.3262	65.9574
28	Survival	6	1.14	6.2	0.0308458	201				False Negative Rate	38.3333	38.3333	13.3333	18.3333	16.6667
28	Survival	9	1.01	1.9	0.00766129	248				False Discovery Rate	36.2069	51.9481	39.5349	14.0351	48.9796
28	Survival	8	1.2	1.44	0.00491468	293				Accuracy	78.1095	68.6567	79.1045	90.5473	71.1443
28	Survival	14	1.43	1.45	0.00884146	164				Precision	63.7931	48.0519	60.4651	85.9649	51.0204
28	Survival	10	1.11	7.98	0.0199002	401				Youden Index	146.773	133.298	162.553	175.993	149.291
28	Survival	10	1.06	7.26	0.0352427	206
28	Survival	7	1.17	3.35	0.0201807	166
28	Survival	3	0.93	3.86	0.0223121	173
28	Survival	10	1.93	1.59	0.00659751	241
28	Survival	9	1.47	0.54	0.00194245	278
28	Survival	2	1.09	1.13	0.00377926	299
28	Survival	8	1.17	0.54	0.00225	240
28	Survival	8	1.06	0.59	0.00608247	97
28	Survival	11	0.99	4.28	0.0221762	193
28	Survival	5	0.97	2.22	0.0180488	123
28	Survival	4	2.06	0.79	0.00484663	163
28	Survival	7	1.14	7.93	0.0119069	666
28	Survival	5	2.14	4.54	0.035748	127
28	Survival	4	1.21	4.46	0.0168302	265
28	Survival	11	1.09	2.47	0.00641558	385
28	Survival	8	1.37	3.15	0.0229927	137
28	Survival	12	1.03	2.95	0.0114786	257
28	Survival	7	1.32	0.47	0.00145963	322
28	Survival	8	1.85	1.81	0.0223457	81
28	Survival	5	1.8	3.4	0.00871795	390
28	Survival	17	1.02	2.32	0.018125	128
28	Survival	13	1.5	3.77	0.0173733	217
28	Survival	9	1.01	2.26	0.0205455	110
28	Survival	11	1.07	2.72	0.0130144	209
28	Survival	11	0.84	1.13	0.00363344	311
28	Survival	6	1.12	1.2	0.00714286	168
28	Survival	3	1.86	1.55	0.00679825	228
28	Survival	12	1.14	3.02	0.0260345	116
28	Survival	4	1.03	3.66	0.0212791	172
28	Survival	4	1.03	1.72	0.0104878	164
28	Survival	5	0.94	0.69	0.00594828	116
28	Survival	10	0.95	9.81	0.0641176	153
28	Survival	16	0.95	1.52	0.00915663	166
28	Survival	11	1.03	3.82	0.0278832	137
28	Survival	12	1.89	4.11	0.0140273	293
28	Survival	13	1.05	6.46	0.0290991	222
28	Survival	13	0.97	8.39	0.06712	125
28	Survival	10	0.93	0.36	0.00262774	137
28	Survival	11	1.23	1.99	0.0144203	138
28	Survival	5	1.17	6.12	0.0551351	111
28	Survival	7	1.29	3.54	0.0357576	99
28	Survival	13	1.53	7.17	0.0237417	302
28	Survival	6	1.28	0.57	0.00548077	104
28	Survival	9	0.9	1.12	0.00470588	238
28	Survival	5	1.05	1.32	0.0102326	129
28	Survival	9	0.89	2.39	0.0138953	172
28	Survival	13	1.15	3.08	0.01232	250
28	Survival	6	1.1	8.67	0.0152373	569
28	Survival	6	1.71	11.17	0.0547549	204
28	Survival	5	0.96	9.38	0.0448804	209
28	Survival	3	1.16	1.42	0.00300847	472
28	Survival	9	0.91	4.99	0.0426496	117
28	Survival	11	1.19	16	0.125	128
28	Survival	4	1.47	3.68	0.0113231	325
28	Survival	14	1.09	1.65	0.0107143	154
28	Survival	5	1.18	2.95	0.0719512	41
28	Survival	13	1.06	5.13	0.0307186	167
28	Survival	5	1.1	1.1	0.00808824	136
28	Survival	18	1.19	13.12	0.064	205
28	Survival	3	1.02	4.63	0.0145141	319
28	Survival	9	1.1	0.63	0.0035	180
28	Survival	9	1.08	2.04	0.00772727	264
28	Survival	20	1.42	8.12	0.0660163	123
28	Survival	5	1.13	3.78	0.0198947	190
28	Survival	11	1.1	8.78	0.0393722	223
28	Survival	5	0.93	2.51	0.00729651	344
28	Survival	8	0.94	2.36	0.00771242	306
28	Survival	19	1.51	6.4	0.012749	502
28	Survival	8	0.95	5.05	0.02525	200
28	Survival	10	1.05	0.14	0.000603448	232
28	Survival	6	1.21	11.08	0.0426154	260
28	Survival	9	0.99	4.32	0.019726	219
28	Survival	5	1.03	1.98	0.0146667	135
28	Survival	5	1.25	0.83	0.00412935	201
28	Survival	6	1.21	2.2	0.0285714	77
28	Survival	6	1.12	0.77	0.00396907	194
28	Survival	11	1.17	12.2	0.0625641	195
28	Survival	5	1.07	1.98	0.00846154	234
28	Survival	3	1.03	2.13	0.0101429	210
28	Survival	5	1.04	0.64	0.00167539	382
28	Survival	3	0.99	0.34	0.00178947	190
28	Survival	6	1.46	1.82	0.0143307	127
28	Survival	8	1.89	10.95	0.135185	81
28	Survival	7	1.13	1.63	0.00981928	166
28	Survival	11	1.63	6.8	0.178947	38
28	Survival	8	1.25	14.54	0.199178	73
28	Survival	4	0.98	0.08	0.00024024	333
28	Survival	10	1.02	4.38	0.0241989	181
28	Survival	4	1.31	8.51	0.0318727	267
28	Survival	10	0.88	2.26	0.0248352	91
28	Survival	5	1.17	11.48	0.0470492	244
28	Survival	4	1.3	2.23	0.0182787	122
28	Survival	6	1.08	8.37	0.0760909	110
28	Survival	10	0.93	7.25	0.0335648	216
28	Survival	10	1.1	16	0.0946746	169
28	Survival	5	1.02	4.44	0.0178313	249
28	Survival	7	1.03	1.89	0.00634228	298
28	Survival	13	1.28	0.81	0.0034322	236
28	Survival	7	1.02	15	0.0443787	338
28	Survival	4	1	2.73	0.0252778	108
28	Survival	7	1.06	1.74	0.00467742	372
28	Survival	11	1.14	4.26	0.0325191	131
28	Survival	8	0.98	4.66	0.0347761	134
28	Survival	6	1.19	2.01	0.00561453	358
28	Survival	5	1.03	5.37	0.0179	300
28	Survival	6	1.28	5.83	0.0555238	105
28	Survival	7	0.97	1.41	0.0129358	109
28	Survival	3	0.96	2.45	0.0224771	109
28	Survival	14	0.94	5.09	0.0613253	83
28	Survival	10	0.98	4.26	0.0417647	102
28	Survival	3	1.19	2.01	0.00463134	434
28	Survival	5	1.1	16	0.0603774	265
28	Survival	3	1.07	1.98	0.0319355	62
28	Survival	3	0.98	2.44	0.00677778	360
28	Survival	7	1.1	1.58	0.0287273	55
28	Survival	7	1.12	2.33	0.0142073	164
28	Survival	7	0.98	5.56	0.04	139
28	Survival	6	1.3	2.23	0.0229897	97
28	Survival	7	1.02	4.21	0.0452688	93
28	Survival	3	1	2.11	0.00727586	290
28	Survival	3	1.05	1.12	0.00459016	244
28	Survival	14	1.36	4.67	0.0190612	245
28	Survival	10	1.01	14.67	0.0838286	175
28	Survival	3	1.24	7.98	0.0296654	269
28	Survival	10	1.21	4.56	0.0230303	198
28	Survival	9	1.07	10.2	0.0325879	313
1	Dead	20	2.17	12.76	0.135745	94
1	Dead	4	2.56	7.99	0.0484242	165
2	Dead	5	1.76	13.38	0.135152	99
2	Dead	15	1.47	4.15	0.0278523	149
2	Dead	9	2.86	20.21	0.125528	161
28	Dead	13	1.13	9.12	0.123243	74
3	Dead	22	1.43	16.12	0.277931	58
3	Dead	15	1.99	60.23	0.542613	111
26	Dead	17	0.98	12.63	0.185735	68
3	Dead	20	1.14	71.48	1.45878	49
3	Dead	11	1.05	20.76	0.0988571	210
10	Dead	21	1.2	6.53	0.176486	37
4	Dead	16	1.15	3.89	0.0682456	57
4	Dead	6	0.94	11.64	0.0680702	171
4	Dead	17	1.26	6.83	0.0346701	197
4	Dead	17	2.31	3.87	0.0879545	44
16	Dead	14	0.9	14.81	0.259825	57
4	Dead	13	0.89	25.39	0.686216	37
5	Dead	25	1.32	16.08	0.51871	31
5	Dead	5	1.07	14.42	0.178025	81
5	Dead	10	1.04	15.2	0.245161	62
5	Dead	10	2.21	11.8	0.120408	98
27	Dead	17	1.23	7.79	0.103867	75
5	Dead	15	1.21	25.87	0.253627	102
5	Dead	15	0.97	24.11	0.204322	118
6	Dead	4	1.29	14.39	0.142475	101
6	Dead	9	1.93	5.99	0.110926	54
6	Dead	11	1.08	5.69	0.0917742	62
6	Dead	12	1.13	2.57	0.0187591	137
6	Dead	18	1.1	61.29	0.205671	298
12	Dead	15	0.92	12.28	0.292381	42
7	Dead	6	1.32	4.44	0.030411	146
7	Dead	8	1.42	8.12	0.0203509	399
7	Dead	7	2.52	3.09	0.0278378	111
7	Dead	11	1.48	31.17	0.117623	265
8	Dead	14	1.13	12.75	0.0772727	165
8	Dead	17	1.15	20.21	0.162984	124
12	Dead	8	2.52	20.5	0.158915	129
10	Dead	9	1.72	61.67	1.50415	41
11	Dead	8	1.1	8.08	0.054966	147
12	Dead	6	2.76	6.57	0.0597273	110
12	Dead	14	1.72	61.67	0.649158	95
13	Dead	3	1.02	12.63	0.341351	37
15	Dead	12	0.84	17.36	0.294237	59
16	Dead	14	1.07	19.7	0.394	50
16	Dead	13	1.25	8.82	0.0760345	116
22	Dead	13	1.04	10.64	0.122299	87
16	Dead	14	2.97	5.09	0.069726	73
17	Dead	17	1.34	24.1	0.199174	121
20	Dead	13	1.44	34.56	0.388315	89
21	Dead	14	1.23	17.88	0.0912245	196
21	Dead	18	0.99	3.33	0.0282203	118
21	Dead	9	2.07	8.82	0.116053	76
23	Dead	20	1.34	40.2	1.18235	34
28	Dead	10	2.42	16.79	0.0717521	234
9	Dead	13	2.3	22.1	0.251136	88
12	Dead	14	1.98	5.56	0.0427692	130
20	Dead	13	1.34	40.2	0.423158	95
18	Dead	13	1.21	14.56	0.112	130
28	Dead	11	2.05	10.2	0.0962264	106

## Sheet: DDIPLT 0.07
time	Outcome	D-DI/PLT				time	Outcome	D-DI/PLT	group <0.07		time	Outcome	D-DI/PLT	group≥0.07		time	Outcome	group		D-DI/PLT					Results
28	Survival	0.0254378				28	Survival	0.0254378	1		28	Survival	0.125	2		28	Survival	1		0.0254378		Comparison of samples		Hazard ratio			Statistical Analysis
28	Survival	0.0150289				28	Survival	0.0150289	1		28	Survival	0.0719512	2		28	Survival	1		0.0150289		Treatment group	Reference group	HR	95%CI		Likelihood ratio test		Wald test		Logrank test
28	Survival	0.00981481				28	Survival	0.00981481	1		28	Survival	0.135185	2		28	Survival	1		0.00981481					Lower	Upper	W-value	P-value	W-value	P-value	W-value	P-value
28	Survival	0.00781818				28	Survival	0.00781818	1		28	Survival	0.178947	2		28	Survival	1		0.00781818		2=D-DI/PLT≥0.07	1=D-DI/PLT<0.07	16.19	8.79	29.8	99.61	1.9e-23	79.99	3.8e-19	138.47	5.7e-32
28	Survival	0.0163594				28	Survival	0.0163594	1		28	Survival	0.199178	2		28	Survival	1		0.0163594
28	Survival	0.0101695				28	Survival	0.0101695	1		28	Survival	0.0760909	2		28	Survival	1		0.0101695
28	Survival	0.0125128				28	Survival	0.0125128	1		28	Survival	0.0946746	2		28	Survival	1		0.0125128
28	Survival	0.0140303				28	Survival	0.0140303	1		28	Survival	0.0838286	2		28	Survival	1		0.0140303
28	Survival	0.0231579				28	Survival	0.0231579	1		1	Survival	0.135745	2		28	Survival	1		0.0231579
28	Survival	0.0207101				28	Survival	0.0207101	1		2	Survival	0.135152	2		28	Survival	1		0.0207101
28	Survival	0.0308458				28	Survival	0.0308458	1		2	Survival	0.125528	2		28	Survival	1		0.0308458
28	Survival	0.00766129				28	Survival	0.00766129	1		28	Survival	0.123243	2		28	Survival	1		0.00766129
28	Survival	0.00491468				28	Survival	0.00491468	1		3	Survival	0.277931	2		28	Survival	1		0.00491468
28	Survival	0.00884146				28	Survival	0.00884146	1		3	Survival	0.542613	2		28	Survival	1		0.00884146
28	Survival	0.0199002				28	Survival	0.0199002	1		26	Survival	0.185735	2		28	Survival	1		0.0199002
28	Survival	0.0352427				28	Survival	0.0352427	1		3	Survival	1.45878	2		28	Survival	1		0.0352427
28	Survival	0.0201807				28	Survival	0.0201807	1		3	Survival	0.0988571	2		28	Survival	1		0.0201807
28	Survival	0.0223121				28	Survival	0.0223121	1		10	Survival	0.176486	2		28	Survival	1		0.0223121
28	Survival	0.00659751				28	Survival	0.00659751	1		4	Survival	0.0879545	2		28	Survival	1		0.00659751
28	Survival	0.00194245				28	Survival	0.00194245	1		16	Survival	0.259825	2		28	Survival	1		0.00194245
28	Survival	0.00377926				28	Survival	0.00377926	1		4	Survival	0.686216	2		28	Survival	1		0.00377926
28	Survival	0.00225				28	Survival	0.00225	1		5	Survival	0.51871	2		28	Survival	1		0.00225
28	Survival	0.00608247				28	Survival	0.00608247	1		5	Survival	0.178025	2		28	Survival	1		0.00608247
28	Survival	0.0221762				28	Survival	0.0221762	1		5	Survival	0.245161	2		28	Survival	1		0.0221762
28	Survival	0.0180488				28	Survival	0.0180488	1		5	Survival	0.120408	2		28	Survival	1		0.0180488
28	Survival	0.00484663				28	Survival	0.00484663	1		27	Survival	0.103867	2		28	Survival	1		0.00484663
28	Survival	0.0119069				28	Survival	0.0119069	1		5	Survival	0.253627	2		28	Survival	1		0.0119069
28	Survival	0.035748				28	Survival	0.035748	1		5	Survival	0.204322	2		28	Survival	1		0.035748
28	Survival	0.0168302				28	Survival	0.0168302	1		6	Survival	0.142475	2		28	Survival	1		0.0168302
28	Survival	0.00641558				28	Survival	0.00641558	1		6	Survival	0.110926	2		28	Survival	1		0.00641558
28	Survival	0.0229927				28	Survival	0.0229927	1		6	Survival	0.0917742	2		28	Survival	1		0.0229927
28	Survival	0.0114786				28	Survival	0.0114786	1		6	Survival	0.205671	2		28	Survival	1		0.0114786
28	Survival	0.00145963				28	Survival	0.00145963	1		12	Survival	0.292381	2		28	Survival	1		0.00145963
28	Survival	0.0223457				28	Survival	0.0223457	1		7	Survival	0.117623	2		28	Survival	1		0.0223457
28	Survival	0.00871795				28	Survival	0.00871795	1		8	Survival	0.0772727	2		28	Survival	1		0.00871795
28	Survival	0.018125				28	Survival	0.018125	1		8	Survival	0.162984	2		28	Survival	1		0.018125
28	Survival	0.0173733				28	Survival	0.0173733	1		12	Survival	0.158915	2		28	Survival	1		0.0173733
28	Survival	0.0205455				28	Survival	0.0205455	1		10	Survival	1.50415	2		28	Survival	1		0.0205455
28	Survival	0.0130144				28	Survival	0.0130144	1		12	Survival	0.649158	2		28	Survival	1		0.0130144
28	Survival	0.00363344				28	Survival	0.00363344	1		13	Survival	0.341351	2		28	Survival	1		0.00363344
28	Survival	0.00714286				28	Survival	0.00714286	1		15	Survival	0.294237	2		28	Survival	1		0.00714286
28	Survival	0.00679825				28	Survival	0.00679825	1		16	Survival	0.394	2		28	Survival	1		0.00679825
28	Survival	0.0260345				28	Survival	0.0260345	1		16	Survival	0.0760345	2		28	Survival	1		0.0260345
28	Survival	0.0212791				28	Survival	0.0212791	1		22	Survival	0.122299	2		28	Survival	1		0.0212791
28	Survival	0.0104878				28	Survival	0.0104878	1		17	Survival	0.199174	2		28	Survival	1		0.0104878
28	Survival	0.00594828				28	Survival	0.00594828	1		20	Survival	0.388315	2		28	Survival	1		0.00594828
28	Survival	0.0641176				28	Survival	0.0641176	1		21	Survival	0.0912245	2		28	Survival	1		0.0641176
28	Survival	0.00915663				28	Survival	0.00915663	1		21	Survival	0.116053	2		28	Survival	1		0.00915663
28	Survival	0.0278832				28	Survival	0.0278832	1		23	Survival	1.18235	2		28	Survival	1		0.0278832
28	Survival	0.0140273				28	Survival	0.0140273	1		28	Survival	0.0717521	2		28	Survival	1		0.0140273
28	Survival	0.0290991				28	Survival	0.0290991	1		9	Survival	0.251136	2		28	Survival	1		0.0290991
28	Survival	0.06712				28	Survival	0.06712	1		20	Survival	0.423158	2		28	Survival	1		0.06712
28	Survival	0.00262774				28	Survival	0.00262774	1		18	Survival	0.112	2		28	Survival	1		0.00262774
28	Survival	0.0144203				28	Survival	0.0144203	1		28	Survival	0.0962264	2		28	Survival	1		0.0144203
28	Survival	0.0551351				28	Survival	0.0551351	1			Survival				28	Survival	1		0.0551351
28	Survival	0.0357576				28	Survival	0.0357576	1			Survival				28	Survival	1		0.0357576
28	Survival	0.0237417				28	Survival	0.0237417	1			Survival				28	Survival	1		0.0237417
28	Survival	0.00548077				28	Survival	0.00548077	1			Survival				28	Survival	1		0.00548077
28	Survival	0.00470588				28	Survival	0.00470588	1			Survival				28	Survival	1		0.00470588
28	Survival	0.0102326				28	Survival	0.0102326	1			Survival				28	Survival	1		0.0102326
28	Survival	0.0138953				28	Survival	0.0138953	1			Survival				28	Survival	1		0.0138953
28	Survival	0.01232				28	Survival	0.01232	1			Survival				28	Survival	1		0.01232
28	Survival	0.0152373				28	Survival	0.0152373	1			Survival				28	Survival	1		0.0152373
28	Survival	0.0547549				28	Survival	0.0547549	1			Survival				28	Survival	1		0.0547549
28	Survival	0.0448804				28	Survival	0.0448804	1			Survival				28	Survival	1		0.0448804
28	Survival	0.00300847				28	Survival	0.00300847	1			Survival				28	Survival	1		0.00300847
28	Survival	0.0426496				28	Survival	0.0426496	1			Survival				28	Survival	1		0.0426496
28	Survival	0.125				28	Survival	0.0113231	1			Survival				28	Survival	1		0.0113231
28	Survival	0.0113231				28	Survival	0.0107143	1			Survival				28	Survival	1		0.0107143
28	Survival	0.0107143				28	Survival	0.0307186	1			Survival				28	Survival	1		0.0307186
28	Survival	0.0719512				28	Survival	0.00808824	1			Survival				28	Survival	1		0.00808824
28	Survival	0.0307186				28	Survival	0.064	1			Survival				28	Survival	1		0.064
28	Survival	0.00808824				28	Survival	0.0145141	1			Survival				28	Survival	1		0.0145141
28	Survival	0.064				28	Survival	0.0035	1			Survival				28	Survival	1		0.0035
28	Survival	0.0145141				28	Survival	0.00772727	1			Survival				28	Survival	1		0.00772727
28	Survival	0.0035				28	Survival	0.0660163	1			Survival				28	Survival	1		0.0660163
28	Survival	0.00772727				28	Survival	0.0198947	1			Survival				28	Survival	1		0.0198947
28	Survival	0.0660163				28	Survival	0.0393722	1			Survival				28	Survival	1		0.0393722
28	Survival	0.0198947				28	Survival	0.00729651	1			Survival				28	Survival	1		0.00729651
28	Survival	0.0393722				28	Survival	0.00771242	1			Survival				28	Survival	1		0.00771242
28	Survival	0.00729651				28	Survival	0.012749	1			Survival				28	Survival	1		0.012749
28	Survival	0.00771242				28	Survival	0.02525	1			Survival				28	Survival	1		0.02525
28	Survival	0.012749				28	Survival	0.000603448	1			Survival				28	Survival	1		0.000603448
28	Survival	0.02525				28	Survival	0.0426154	1			Survival				28	Survival	1		0.0426154
28	Survival	0.000603448				28	Survival	0.019726	1			Survival				28	Survival	1		0.019726
28	Survival	0.0426154				28	Survival	0.0146667	1			Survival				28	Survival	1		0.0146667
28	Survival	0.019726				28	Survival	0.00412935	1			Survival				28	Survival	1		0.00412935
28	Survival	0.0146667				28	Survival	0.0285714	1			Survival				28	Survival	1		0.0285714
28	Survival	0.00412935				28	Survival	0.00396907	1			Survival				28	Survival	1		0.00396907
28	Survival	0.0285714				28	Survival	0.0625641	1			Survival				28	Survival	1		0.0625641
28	Survival	0.00396907				28	Survival	0.00846154	1			Survival				28	Survival	1		0.00846154
28	Survival	0.0625641				28	Survival	0.0101429	1			Survival				28	Survival	1		0.0101429
28	Survival	0.00846154				28	Survival	0.00167539	1			Survival				28	Survival	1		0.00167539
28	Survival	0.0101429				28	Survival	0.00178947	1			Survival				28	Survival	1		0.00178947
28	Survival	0.00167539				28	Survival	0.0143307	1			Survival				28	Survival	1		0.0143307
28	Survival	0.00178947				28	Survival	0.00981928	1			Survival				28	Survival	1		0.00981928
28	Survival	0.0143307				28	Survival	0.00024024	1			Survival				28	Survival	1		0.00024024
28	Survival	0.135185				28	Survival	0.0241989	1			Survival				28	Survival	1		0.0241989
28	Survival	0.00981928				28	Survival	0.0318727	1			Survival				28	Survival	1		0.0318727
28	Survival	0.178947				28	Survival	0.0248352	1			Survival				28	Survival	1		0.0248352
28	Survival	0.199178				28	Survival	0.0470492	1			Survival				28	Survival	1		0.0470492
28	Survival	0.00024024				28	Survival	0.0182787	1			Survival				28	Survival	1		0.0182787
28	Survival	0.0241989				28	Survival	0.0335648	1			Survival				28	Survival	1		0.0335648
28	Survival	0.0318727				28	Survival	0.0178313	1			Survival				28	Survival	1		0.0178313
28	Survival	0.0248352				28	Survival	0.00634228	1			Survival				28	Survival	1		0.00634228
28	Survival	0.0470492				28	Survival	0.0034322	1			Survival				28	Survival	1		0.0034322
28	Survival	0.0182787				28	Survival	0.0443787	1			Survival				28	Survival	1		0.0443787
28	Survival	0.0760909				28	Survival	0.0252778	1			Survival				28	Survival	1		0.0252778
28	Survival	0.0335648				28	Survival	0.00467742	1			Survival				28	Survival	1		0.00467742
28	Survival	0.0946746				28	Survival	0.0325191	1			Survival				28	Survival	1		0.0325191
28	Survival	0.0178313				28	Survival	0.0347761	1			Survival				28	Survival	1		0.0347761
28	Survival	0.00634228				28	Survival	0.00561453	1			Survival				28	Survival	1		0.00561453
28	Survival	0.0034322				28	Survival	0.0179	1			Survival				28	Survival	1		0.0179
28	Survival	0.0443787				28	Survival	0.0555238	1			Survival				28	Survival	1		0.0555238
28	Survival	0.0252778				28	Survival	0.0129358	1			Survival				28	Survival	1		0.0129358
28	Survival	0.00467742				28	Survival	0.0224771	1			Survival				28	Survival	1		0.0224771
28	Survival	0.0325191				28	Survival	0.0613253	1			Survival				28	Survival	1		0.0613253
28	Survival	0.0347761				28	Survival	0.0417647	1			Survival				28	Survival	1		0.0417647
28	Survival	0.00561453				28	Survival	0.00463134	1			Survival				28	Survival	1		0.00463134
28	Survival	0.0179				28	Survival	0.0603774	1			Survival				28	Survival	1		0.0603774
28	Survival	0.0555238				28	Survival	0.0319355	1			Survival				28	Survival	1		0.0319355
28	Survival	0.0129358				28	Survival	0.00677778	1			Survival				28	Survival	1		0.00677778
28	Survival	0.0224771				28	Survival	0.0287273	1			Survival				28	Survival	1		0.0287273
28	Survival	0.0613253				28	Survival	0.0142073	1			Survival				28	Survival	1		0.0142073
28	Survival	0.0417647				28	Survival	0.04	1			Survival				28	Survival	1		0.04
28	Survival	0.00463134				28	Survival	0.0229897	1			Survival				28	Survival	1		0.0229897
28	Survival	0.0603774				28	Survival	0.0452688	1			Survival				28	Survival	1		0.0452688
28	Survival	0.0319355				28	Survival	0.00727586	1			Survival				28	Survival	1		0.00727586
28	Survival	0.00677778				28	Survival	0.00459016	1			Survival				28	Survival	1		0.00459016
28	Survival	0.0287273				28	Survival	0.0190612	1			Survival				28	Survival	1		0.0190612
28	Survival	0.0142073				28	Survival	0.0296654	1			Survival				28	Survival	1		0.0296654
28	Survival	0.04				28	Survival	0.0230303	1			Survival				28	Survival	1		0.0230303
28	Survival	0.0229897				28	Survival	0.0325879	1			Survival				28	Survival	1		0.0325879
28	Survival	0.0452688				1	Survival	0.0484242	1			Survival				1	Survival	1		0.0484242
28	Survival	0.00727586				2	Survival	0.0278523	1			Survival				2	Survival	1		0.0278523
28	Survival	0.00459016				4	Survival	0.0682456	1			Survival				4	Survival	1		0.0682456
28	Survival	0.0190612				4	Survival	0.0680702	1			Survival				4	Survival	1		0.0680702
28	Survival	0.0838286				4	Survival	0.0346701	1			Survival				4	Survival	1		0.0346701
28	Survival	0.0296654				6	Survival	0.0187591	1			Survival				6	Survival	1		0.0187591
28	Survival	0.0230303				7	Survival	0.030411	1			Survival				7	Survival	1		0.030411
28	Survival	0.0325879				7	Survival	0.0203509	1			Survival				7	Survival	1		0.0203509
1	Dead	0.135745				7	Dead	0.0278378	1			Dead				7	Dead	1		0.0278378
1	Dead	0.0484242				11	Dead	0.054966	1			Dead				11	Dead	1		0.054966
2	Dead	0.135152				12	Dead	0.0597273	1			Dead				12	Dead	1		0.0597273
2	Dead	0.0278523				16	Dead	0.069726	1			Dead				16	Dead	1		0.069726
2	Dead	0.125528				21	Dead	0.0282203	1			Dead				21	Dead	1		0.0282203
28	Dead	0.123243				12	Dead	0.0427692	1			Dead				12	Dead	1		0.0427692
3	Dead	0.277931					Dead					Dead				28	Dead	2		0.125
3	Dead	0.542613					Dead					Dead				28	Dead	2		0.0719512
26	Dead	0.185735					Dead					Dead				28	Dead	2		0.135185
3	Dead	1.45878					Dead					Dead				28	Dead	2		0.178947
3	Dead	0.0988571					Dead					Dead				28	Dead	2		0.199178
10	Dead	0.176486					Dead					Dead				28	Dead	2		0.0760909
4	Dead	0.0682456					Dead					Dead				28	Dead	2		0.0946746
4	Dead	0.0680702					Dead					Dead				28	Dead	2		0.0838286
4	Dead	0.0346701					Dead					Dead				1	Dead	2		0.135745
4	Dead	0.0879545					Dead					Dead				2	Dead	2		0.135152
16	Dead	0.259825					Dead					Dead				2	Dead	2		0.125528
4	Dead	0.686216					Dead					Dead				28	Dead	2		0.123243
5	Dead	0.51871					Dead					Dead				3	Dead	2		0.277931
5	Dead	0.178025					Dead					Dead				3	Dead	2		0.542613
5	Dead	0.245161					Dead					Dead				26	Dead	2		0.185735
5	Dead	0.120408					Dead					Dead				3	Dead	2		1.45878
27	Dead	0.103867					Dead					Dead				3	Dead	2		0.0988571
5	Dead	0.253627					Dead					Dead				10	Dead	2		0.176486
5	Dead	0.204322					Dead					Dead				4	Dead	2		0.0879545
6	Dead	0.142475					Dead					Dead				16	Dead	2		0.259825
6	Dead	0.110926					Dead					Dead				4	Dead	2		0.686216
6	Dead	0.0917742					Dead					Dead				5	Dead	2		0.51871
6	Dead	0.0187591					Dead					Dead				5	Dead	2		0.178025
6	Dead	0.205671					Dead					Dead				5	Dead	2		0.245161
12	Dead	0.292381					Dead					Dead				5	Dead	2		0.120408
7	Dead	0.030411					Dead					Dead				27	Dead	2		0.103867
7	Dead	0.0203509					Dead					Dead				5	Dead	2		0.253627
7	Dead	0.0278378					Dead					Dead				5	Dead	2		0.204322
7	Dead	0.117623					Dead					Dead				6	Dead	2		0.142475
8	Dead	0.0772727					Dead					Dead				6	Dead	2		0.110926
8	Dead	0.162984					Dead					Dead				6	Dead	2		0.0917742
12	Dead	0.158915					Dead					Dead				6	Dead	2		0.205671
10	Dead	1.50415					Dead					Dead				12	Dead	2		0.292381
11	Dead	0.054966					Dead					Dead				7	Dead	2		0.117623
12	Dead	0.0597273					Dead					Dead				8	Dead	2		0.0772727
12	Dead	0.649158					Dead					Dead				8	Dead	2		0.162984
13	Dead	0.341351					Dead					Dead				12	Dead	2		0.158915
15	Dead	0.294237					Dead					Dead				10	Dead	2		1.50415
16	Dead	0.394					Dead					Dead				12	Dead	2		0.649158
16	Dead	0.0760345					Dead					Dead				13	Dead	2		0.341351
22	Dead	0.122299					Dead					Dead				15	Dead	2		0.294237
16	Dead	0.069726					Dead					Dead				16	Dead	2		0.394
17	Dead	0.199174					Dead					Dead				16	Dead	2		0.0760345
20	Dead	0.388315					Dead					Dead				22	Dead	2		0.122299
21	Dead	0.0912245					Dead					Dead				17	Dead	2		0.199174
21	Dead	0.0282203					Dead					Dead				20	Dead	2		0.388315
21	Dead	0.116053					Dead					Dead				21	Dead	2		0.0912245
23	Dead	1.18235					Dead					Dead				21	Dead	2		0.116053
28	Dead	0.0717521					Dead					Dead				23	Dead	2		1.18235
9	Dead	0.251136					Dead					Dead				28	Dead	2		0.0717521
12	Dead	0.0427692					Dead					Dead				9	Dead	2		0.251136
20	Dead	0.423158					Dead					Dead				20	Dead	2		0.423158
18	Dead	0.112					Dead					Dead				18	Dead	2		0.112
28	Dead	0.0962264					Dead					Dead				28	Dead	2		0.0962264

## Sheet: D-DI 5.54
time	Outcome	D-DI				time	Outcome	D-DI	group<5.54			time	Outcome	D-DI	group≥5.54		time	Outcome	group	D-DI					Results
28	Survival	5.52				28	Survival	5.52	1			28	Survival	6.2	2		28	Survival	1	5.52		Comparison of samples		Hazard ratio			Statistical Analysis
28	Survival	2.6				28	Survival	2.6	1			28	Survival	7.98	2		28	Survival	1	2.6		Treatment group	Reference group	HR	95%CI		Likelihood ratio test		Wald test		Logrank test
28	Survival	1.59				28	Survival	1.59	1			28	Survival	7.26	2		28	Survival	1	1.59					Lower	Upper	W-value	P-value	W-value	P-value	W-value	P-value
28	Survival	2.58				28	Survival	2.58	1			28	Survival	7.93	2		28	Survival	1	2.58		2=D-DI≥5.54	1=D-DI＜5.54	12.36	5.86	26.09	69.51	7.6e-17	43.54	4.1e-11	70.82	3.9e-17
28	Survival	3.55				28	Survival	3.55	1			28	Survival	9.81	2		28	Survival	1	3.55
28	Survival	1.2				28	Survival	1.2	1			28	Survival	6.46	2		28	Survival	1	1.2
28	Survival	2.44				28	Survival	2.44	1			28	Survival	8.39	2		28	Survival	1	2.44
28	Survival	4.63				28	Survival	4.63	1			28	Survival	6.12	2		28	Survival	1	4.63
28	Survival	2.64				28	Survival	2.64	1			28	Survival	7.17	2		28	Survival	1	2.64
28	Survival	3.5				28	Survival	3.5	1			28	Survival	8.67	2		28	Survival	1	3.5
28	Survival	6.2				28	Survival	1.9	1			28	Survival	11.17	2		28	Survival	1	1.9
28	Survival	1.9				28	Survival	1.44	1			28	Survival	9.38	2		28	Survival	1	1.44
28	Survival	1.44				28	Survival	1.45	1			28	Survival	16	2		28	Survival	1	1.45
28	Survival	1.45				28	Survival	3.35	1			28	Survival	13.12	2		28	Survival	1	3.35
28	Survival	7.98				28	Survival	3.86	1			28	Survival	8.12	2		28	Survival	1	3.86
28	Survival	7.26				28	Survival	1.59	1			28	Survival	8.78	2		28	Survival	1	1.59
28	Survival	3.35				28	Survival	0.54	1			28	Survival	6.4	2		28	Survival	1	0.54
28	Survival	3.86				28	Survival	1.13	1			28	Survival	11.08	2		28	Survival	1	1.13
28	Survival	1.59				28	Survival	0.54	1			28	Survival	12.2	2		28	Survival	1	0.54
28	Survival	0.54				28	Survival	0.59	1			28	Survival	10.95	2		28	Survival	1	0.59
28	Survival	1.13				28	Survival	4.28	1			28	Survival	6.8	2		28	Survival	1	4.28
28	Survival	0.54				28	Survival	2.22	1			28	Survival	14.54	2		28	Survival	1	2.22
28	Survival	0.59				28	Survival	0.79	1			28	Survival	8.51	2		28	Survival	1	0.79
28	Survival	4.28				28	Survival	4.54	1			28	Survival	11.48	2		28	Survival	1	4.54
28	Survival	2.22				28	Survival	4.46	1			28	Survival	8.37	2		28	Survival	1	4.46
28	Survival	0.79				28	Survival	2.47	1			28	Survival	7.25	2		28	Survival	1	2.47
28	Survival	7.93				28	Survival	3.15	1			28	Survival	16	2		28	Survival	1	3.15
28	Survival	4.54				28	Survival	2.95	1			28	Survival	15	2		28	Survival	1	2.95
28	Survival	4.46				28	Survival	0.47	1			28	Survival	5.83	2		28	Survival	1	0.47
28	Survival	2.47				28	Survival	1.81	1			28	Survival	16	2		28	Survival	1	1.81
28	Survival	3.15				28	Survival	3.4	1			28	Survival	5.56	2		28	Survival	1	3.4
28	Survival	2.95				28	Survival	2.32	1			28	Survival	14.67	2		28	Survival	1	2.32
28	Survival	0.47				28	Survival	3.77	1			28	Survival	7.98	2		28	Survival	1	3.77
28	Survival	1.81				28	Survival	2.26	1			28	Survival	10.2	2		28	Survival	1	2.26
28	Survival	3.4				28	Survival	2.72	1			1	Survival	12.76	2		28	Survival	1	2.72
28	Survival	2.32				28	Survival	1.13	1			1	Survival	7.99	2		28	Survival	1	1.13
28	Survival	3.77				28	Survival	1.2	1			2	Survival	13.38	2		28	Survival	1	1.2
28	Survival	2.26				28	Survival	1.55	1			2	Survival	20.21	2		28	Survival	1	1.55
28	Survival	2.72				28	Survival	3.02	1			28	Survival	9.12	2		28	Survival	1	3.02
28	Survival	1.13				28	Survival	3.66	1			3	Survival	16.12	2		28	Survival	1	3.66
28	Survival	1.2				28	Survival	1.72	1			3	Survival	60.23	2		28	Survival	1	1.72
28	Survival	1.55				28	Survival	0.69	1			26	Survival	12.63	2		28	Survival	1	0.69
28	Survival	3.02				28	Survival	1.52	1			3	Survival	71.48	2		28	Survival	1	1.52
28	Survival	3.66				28	Survival	3.82	1			3	Survival	20.76	2		28	Survival	1	3.82
28	Survival	1.72				28	Survival	4.11	1			10	Survival	6.53	2		28	Survival	1	4.11
28	Survival	0.69				28	Survival	0.36	1			4	Survival	11.64	2		28	Survival	1	0.36
28	Survival	9.81				28	Survival	1.99	1			4	Survival	6.83	2		28	Survival	1	1.99
28	Survival	1.52				28	Survival	3.54	1			16	Survival	14.81	2		28	Survival	1	3.54
28	Survival	3.82				28	Survival	0.57	1			4	Survival	25.39	2		28	Survival	1	0.57
28	Survival	4.11				28	Survival	1.12	1			5	Survival	16.08	2		28	Survival	1	1.12
28	Survival	6.46				28	Survival	1.32	1			5	Survival	14.42	2		28	Survival	1	1.32
28	Survival	8.39				28	Survival	2.39	1			5	Survival	15.2	2		28	Survival	1	2.39
28	Survival	0.36				28	Survival	3.08	1			5	Survival	11.8	2		28	Survival	1	3.08
28	Survival	1.99				28	Survival	1.42	1			27	Survival	7.79	2		28	Survival	1	1.42
28	Survival	6.12				28	Survival	4.99	1			5	Survival	25.87	2		28	Survival	1	4.99
28	Survival	3.54				28	Survival	3.68	1			5	Survival	24.11	2		28	Survival	1	3.68
28	Survival	7.17				28	Survival	1.65	1			6	Survival	14.39	2		28	Survival	1	1.65
28	Survival	0.57				28	Survival	2.95	1			6	Survival	5.99	2		28	Survival	1	2.95
28	Survival	1.12				28	Survival	5.13	1			6	Survival	5.69	2		28	Survival	1	5.13
28	Survival	1.32				28	Survival	1.1	1			6	Survival	61.29	2		28	Survival	1	1.1
28	Survival	2.39				28	Survival	4.63	1			12	Survival	12.28	2		28	Survival	1	4.63
28	Survival	3.08				28	Survival	0.63	1			7	Survival	8.12	2		28	Survival	1	0.63
28	Survival	8.67				28	Survival	2.04	1			7	Survival	31.17	2		28	Survival	1	2.04
28	Survival	11.17				28	Survival	3.78	1			8	Survival	12.75	2		28	Survival	1	3.78
28	Survival	9.38				28	Survival	2.51	1			8	Survival	20.21	2		28	Survival	1	2.51
28	Survival	1.42				28	Survival	2.36	1			12	Survival	20.5	2		28	Survival	1	2.36
28	Survival	4.99				28	Survival	5.05	1			10	Survival	61.67	2		28	Survival	1	5.05
28	Survival	16				28	Survival	0.14	1			11	Survival	8.08	2		28	Survival	1	0.14
28	Survival	3.68				28	Survival	4.32	1			12	Survival	6.57	2		28	Survival	1	4.32
28	Survival	1.65				28	Survival	1.98	1			12	Survival	61.67	2		28	Survival	1	1.98
28	Survival	2.95				28	Survival	0.83	1			13	Survival	12.63	2		28	Survival	1	0.83
28	Survival	5.13				28	Survival	2.2	1			15	Survival	17.36	2		28	Survival	1	2.2
28	Survival	1.1				28	Survival	0.77	1			16	Survival	19.7	2		28	Survival	1	0.77
28	Survival	13.12				28	Survival	1.98	1			16	Survival	8.82	2		28	Survival	1	1.98
28	Survival	4.63				28	Survival	2.13	1			22	Survival	10.64	2		28	Survival	1	2.13
28	Survival	0.63				28	Survival	0.64	1			17	Survival	24.1	2		28	Survival	1	0.64
28	Survival	2.04				28	Survival	0.34	1			20	Survival	34.56	2		28	Survival	1	0.34
28	Survival	8.12				28	Survival	1.82	1			21	Survival	17.88	2		28	Survival	1	1.82
28	Survival	3.78				28	Survival	1.63	1			21	Survival	8.82	2		28	Survival	1	1.63
28	Survival	8.78				28	Survival	0.08	1			23	Survival	40.2	2		28	Survival	1	0.08
28	Survival	2.51				28	Survival	4.38	1			28	Survival	16.79	2		28	Survival	1	4.38
28	Survival	2.36				28	Survival	2.26	1			9	Survival	22.1	2		28	Survival	1	2.26
28	Survival	6.4				28	Survival	2.23	1			12	Survival	5.56	2		28	Survival	1	2.23
28	Survival	5.05				28	Survival	4.44	1			20	Survival	40.2	2		28	Survival	1	4.44
28	Survival	0.14				28	Survival	1.89	1			18	Survival	14.56	2		28	Survival	1	1.89
28	Survival	11.08				28	Survival	0.81	1			28	Survival	10.2	2		28	Survival	1	0.81
28	Survival	4.32				28	Survival	2.73	1				Survival				28	Survival	1	2.73
28	Survival	1.98				28	Survival	1.74	1				Survival				28	Survival	1	1.74
28	Survival	0.83				28	Survival	4.26	1				Survival				28	Survival	1	4.26
28	Survival	2.2				28	Survival	4.66	1				Survival				28	Survival	1	4.66
28	Survival	0.77				28	Survival	2.01	1				Survival				28	Survival	1	2.01
28	Survival	12.2				28	Survival	5.37	1				Survival				28	Survival	1	5.37
28	Survival	1.98				28	Survival	1.41	1				Survival				28	Survival	1	1.41
28	Survival	2.13				28	Survival	2.45	1				Survival				28	Survival	1	2.45
28	Survival	0.64				28	Survival	5.09	1				Survival				28	Survival	1	5.09
28	Survival	0.34				28	Survival	4.26	1				Survival				28	Survival	1	4.26
28	Survival	1.82				28	Survival	2.01	1				Survival				28	Survival	1	2.01
28	Survival	10.95				28	Survival	1.98	1				Survival				28	Survival	1	1.98
28	Survival	1.63				28	Survival	2.44	1				Survival				28	Survival	1	2.44
28	Survival	6.8				28	Survival	1.58	1				Survival				28	Survival	1	1.58
28	Survival	14.54				28	Survival	2.33	1				Survival				28	Survival	1	2.33
28	Survival	0.08				28	Survival	2.23	1				Survival				28	Survival	1	2.23
28	Survival	4.38				28	Survival	4.21	1				Survival				28	Survival	1	4.21
28	Survival	8.51				28	Survival	2.11	1				Survival				28	Survival	1	2.11
28	Survival	2.26				28	Survival	1.12	1				Survival				28	Survival	1	1.12
28	Survival	11.48				28	Survival	4.67	1				Survival				28	Survival	1	4.67
28	Survival	2.23				28	Survival	4.56	1				Survival				28	Survival	1	4.56
28	Survival	8.37				2	Survival	4.15	1				Survival				2	Survival	1	4.15
28	Survival	7.25				4	Survival	3.89	1				Survival				4	Survival	1	3.89
28	Survival	16				4	Survival	3.87	1				Survival				4	Survival	1	3.87
28	Survival	4.44				6	Survival	2.57	1				Survival				6	Survival	1	2.57
28	Survival	1.89				7	Survival	4.44	1				Survival				7	Survival	1	4.44
28	Survival	0.81				7	Survival	3.09	1				Survival				7	Survival	1	3.09
28	Survival	15				16	Survival	5.09	1				Survival				16	Survival	1	5.09
28	Survival	2.73				21	Survival	3.33	1				Survival				21	Survival	1	3.33
28	Survival	1.74					Survival						Survival				28	Survival	2	6.2
28	Survival	4.26					Survival						Survival				28	Survival	2	7.98
28	Survival	4.66					Survival						Survival				28	Survival	2	7.26
28	Survival	2.01					Survival						Survival				28	Survival	2	7.93
28	Survival	5.37					Survival						Survival				28	Survival	2	9.81
28	Survival	5.83					Survival						Survival				28	Survival	2	6.46
28	Survival	1.41					Survival						Survival				28	Survival	2	8.39
28	Survival	2.45					Survival						Survival				28	Survival	2	6.12
28	Survival	5.09					Survival						Survival				28	Survival	2	7.17
28	Survival	4.26					Survival						Survival				28	Survival	2	8.67
28	Survival	2.01					Survival						Survival				28	Survival	2	11.17
28	Survival	16					Survival						Survival				28	Survival	2	9.38
28	Survival	1.98					Survival						Survival				28	Survival	2	16
28	Survival	2.44					Survival						Survival				28	Survival	2	13.12
28	Survival	1.58					Survival						Survival				28	Survival	2	8.12
28	Survival	2.33					Survival						Survival				28	Survival	2	8.78
28	Survival	5.56					Survival						Survival				28	Survival	2	6.4
28	Survival	2.23					Survival						Survival				28	Survival	2	11.08
28	Survival	4.21					Survival						Survival				28	Survival	2	12.2
28	Survival	2.11					Survival						Survival				28	Survival	2	10.95
28	Survival	1.12					Survival						Survival				28	Survival	2	6.8
28	Survival	4.67					Survival						Survival				28	Survival	2	14.54
28	Survival	14.67					Survival						Survival				28	Survival	2	8.51
28	Survival	7.98					Survival						Survival				28	Survival	2	11.48
28	Survival	4.56					Survival						Survival				28	Survival	2	8.37
28	Survival	10.2					Survival						Survival				28	Survival	2	7.25
1	Dead	12.76					Dead						Dead				28	Dead	2	16
1	Dead	7.99					Dead						Dead				28	Dead	2	15
2	Dead	13.38					Dead						Dead				28	Dead	2	5.83
2	Dead	4.15					Dead						Dead				28	Dead	2	16
2	Dead	20.21					Dead						Dead				28	Dead	2	5.56
28	Dead	9.12					Dead						Dead				28	Dead	2	14.67
3	Dead	16.12					Dead						Dead				28	Dead	2	7.98
3	Dead	60.23					Dead						Dead				28	Dead	2	10.2
26	Dead	12.63					Dead						Dead				1	Dead	2	12.76
3	Dead	71.48					Dead						Dead				1	Dead	2	7.99
3	Dead	20.76					Dead						Dead				2	Dead	2	13.38
10	Dead	6.53					Dead						Dead				2	Dead	2	20.21
4	Dead	3.89					Dead						Dead				28	Dead	2	9.12
4	Dead	11.64					Dead						Dead				3	Dead	2	16.12
4	Dead	6.83					Dead						Dead				3	Dead	2	60.23
4	Dead	3.87					Dead						Dead				26	Dead	2	12.63
16	Dead	14.81					Dead						Dead				3	Dead	2	71.48
4	Dead	25.39					Dead						Dead				3	Dead	2	20.76
5	Dead	16.08					Dead						Dead				10	Dead	2	6.53
5	Dead	14.42					Dead						Dead				4	Dead	2	11.64
5	Dead	15.2					Dead						Dead				4	Dead	2	6.83
5	Dead	11.8					Dead						Dead				16	Dead	2	14.81
27	Dead	7.79					Dead						Dead				4	Dead	2	25.39
5	Dead	25.87					Dead						Dead				5	Dead	2	16.08
5	Dead	24.11					Dead						Dead				5	Dead	2	14.42
6	Dead	14.39					Dead						Dead				5	Dead	2	15.2
6	Dead	5.99					Dead						Dead				5	Dead	2	11.8
6	Dead	5.69					Dead						Dead				27	Dead	2	7.79
6	Dead	2.57					Dead						Dead				5	Dead	2	25.87
6	Dead	61.29					Dead						Dead				5	Dead	2	24.11
12	Dead	12.28					Dead						Dead				6	Dead	2	14.39
7	Dead	4.44					Dead						Dead				6	Dead	2	5.99
7	Dead	8.12					Dead						Dead				6	Dead	2	5.69
7	Dead	3.09					Dead						Dead				6	Dead	2	61.29
7	Dead	31.17					Dead						Dead				12	Dead	2	12.28
8	Dead	12.75					Dead						Dead				7	Dead	2	8.12
8	Dead	20.21					Dead						Dead				7	Dead	2	31.17
12	Dead	20.5					Dead						Dead				8	Dead	2	12.75
10	Dead	61.67					Dead						Dead				8	Dead	2	20.21
11	Dead	8.08					Dead						Dead				12	Dead	2	20.5
12	Dead	6.57					Dead						Dead				10	Dead	2	61.67
12	Dead	61.67					Dead						Dead				11	Dead	2	8.08
13	Dead	12.63					Dead						Dead				12	Dead	2	6.57
15	Dead	17.36					Dead						Dead				12	Dead	2	61.67
16	Dead	19.7					Dead						Dead				13	Dead	2	12.63
16	Dead	8.82					Dead						Dead				15	Dead	2	17.36
22	Dead	10.64					Dead						Dead				16	Dead	2	19.7
16	Dead	5.09					Dead						Dead				16	Dead	2	8.82
17	Dead	24.1					Dead						Dead				22	Dead	2	10.64
20	Dead	34.56					Dead						Dead				17	Dead	2	24.1
21	Dead	17.88					Dead						Dead				20	Dead	2	34.56
21	Dead	3.33					Dead						Dead				21	Dead	2	17.88
21	Dead	8.82					Dead						Dead				21	Dead	2	8.82
23	Dead	40.2					Dead						Dead				23	Dead	2	40.2
28	Dead	16.79					Dead						Dead				28	Dead	2	16.79
9	Dead	22.1					Dead						Dead				9	Dead	2	22.1
12	Dead	5.56					Dead						Dead				12	Dead	2	5.56
20	Dead	40.2					Dead						Dead				20	Dead	2	40.2
18	Dead	14.56					Dead						Dead				18	Dead	2	14.56
28	Dead	10.2					Dead						Dead				28	Dead	2	10.2

## Sheet: SOFA 11.5
time	Outcome	SOFA			time	Outcome	SOFA	Group			time	Outcome	SOFA	Group		time	Outcome	Group	SOFA					Results
28	Survival	14			28	Survival	5	<11.5			28	Survival	14	≥11.5		28	Survival	1	5		Comparison of samples		Hazard ratio			Statistical Analysis
28	Survival	18			28	Survival	3	<11.5			28	Survival	18	≥11.5		28	Survival	1	3		Treatment group	Reference group	HR	95%CI		Likelihood ratio test		Wald test		Logrank test
28	Survival	5			28	Survival	7	<11.5			28	Survival	14	≥11.5		28	Survival	1	7					Lower	Upper	W-value	P-value	W-value	P-value	W-value	P-value
28	Survival	3			28	Survival	3	<11.5			28	Survival	12	≥11.5		28	Survival	1	3		2=SOFA≥11.5	1=SOFA<161.5	5.29	3.13	8.93	39.6	3.1e-10	38.84	4.6e-10	48.35	3.6e-12
28	Survival	7			28	Survival	2	<11.5			28	Survival	17	≥11.5		28	Survival	1	2
28	Survival	3			28	Survival	10	<11.5			28	Survival	13	≥11.5		28	Survival	1	10
28	Survival	2			28	Survival	6	<11.5			28	Survival	12	≥11.5		28	Survival	1	6
28	Survival	10			28	Survival	11	<11.5			28	Survival	16	≥11.5		28	Survival	1	11
28	Survival	6			28	Survival	6	<11.5			28	Survival	12	≥11.5		28	Survival	1	6
28	Survival	11			28	Survival	9	<11.5			28	Survival	13	≥11.5		28	Survival	1	9
28	Survival	6			28	Survival	8	<11.5			28	Survival	13	≥11.5		28	Survival	1	8
28	Survival	9			28	Survival	10	<11.5			28	Survival	13	≥11.5		28	Survival	1	10
28	Survival	8			28	Survival	10	<11.5			28	Survival	13	≥11.5		28	Survival	1	10
28	Survival	14			28	Survival	7	<11.5			28	Survival	14	≥11.5		28	Survival	1	7
28	Survival	10			28	Survival	3	<11.5			28	Survival	13	≥11.5		28	Survival	1	3
28	Survival	10			28	Survival	10	<11.5			28	Survival	18	≥11.5		28	Survival	1	10
28	Survival	7			28	Survival	9	<11.5			28	Survival	20	≥11.5		28	Survival	1	9
28	Survival	3			28	Survival	2	<11.5			28	Survival	19	≥11.5		28	Survival	1	2
28	Survival	10			28	Survival	8	<11.5			28	Survival	13	≥11.5		28	Survival	1	8
28	Survival	9			28	Survival	8	<11.5			28	Survival	14	≥11.5		28	Survival	1	8
28	Survival	2			28	Survival	11	<11.5			28	Survival	14	≥11.5		28	Survival	1	11
28	Survival	8			28	Survival	5	<11.5			1	Survival	20	≥11.5		28	Survival	1	5
28	Survival	8			28	Survival	4	<11.5			2	Survival	15	≥11.5		28	Survival	1	4
28	Survival	11			28	Survival	7	<11.5			28	Survival	13	≥11.5		28	Survival	1	7
28	Survival	5			28	Survival	5	<11.5			3	Survival	22	≥11.5		28	Survival	1	5
28	Survival	4			28	Survival	4	<11.5			3	Survival	15	≥11.5		28	Survival	1	4
28	Survival	7			28	Survival	11	<11.5			26	Survival	17	≥11.5		28	Survival	1	11
28	Survival	5			28	Survival	8	<11.5			3	Survival	20	≥11.5		28	Survival	1	8
28	Survival	4			28	Survival	7	<11.5			10	Survival	21	≥11.5		28	Survival	1	7
28	Survival	11			28	Survival	8	<11.5			4	Survival	16	≥11.5		28	Survival	1	8
28	Survival	8			28	Survival	5	<11.5			4	Survival	17	≥11.5		28	Survival	1	5
28	Survival	12			28	Survival	9	<11.5			4	Survival	17	≥11.5		28	Survival	1	9
28	Survival	7			28	Survival	11	<11.5			16	Survival	14	≥11.5		28	Survival	1	11
28	Survival	8			28	Survival	11	<11.5			4	Survival	13	≥11.5		28	Survival	1	11
28	Survival	5			28	Survival	6	<11.5			5	Survival	25	≥11.5		28	Survival	1	6
28	Survival	17			28	Survival	3	<11.5			27	Survival	17	≥11.5		28	Survival	1	3
28	Survival	13			28	Survival	4	<11.5			5	Survival	15	≥11.5		28	Survival	1	4
28	Survival	9			28	Survival	4	<11.5			5	Survival	15	≥11.5		28	Survival	1	4
28	Survival	11			28	Survival	5	<11.5			6	Survival	12	≥11.5		28	Survival	1	5
28	Survival	11			28	Survival	10	<11.5			6	Survival	18	≥11.5		28	Survival	1	10
28	Survival	6			28	Survival	11	<11.5			12	Survival	15	≥11.5		28	Survival	1	11
28	Survival	3			28	Survival	10	<11.5			8	Survival	14	≥11.5		28	Survival	1	10
28	Survival	12			28	Survival	11	<11.5			8	Survival	17	≥11.5		28	Survival	1	11
28	Survival	4			28	Survival	5	<11.5			12	Survival	14	≥11.5		28	Survival	1	5
28	Survival	4			28	Survival	7	<11.5			15	Survival	12	≥11.5		28	Survival	1	7
28	Survival	5			28	Survival	6	<11.5			16	Survival	14	≥11.5		28	Survival	1	6
28	Survival	10			28	Survival	9	<11.5			16	Survival	13	≥11.5		28	Survival	1	9
28	Survival	16			28	Survival	5	<11.5			22	Survival	13	≥11.5		28	Survival	1	5
28	Survival	11			28	Survival	9	<11.5			16	Survival	14	≥11.5		28	Survival	1	9
28	Survival	12			28	Survival	6	<11.5			17	Survival	17	≥11.5		28	Survival	1	6
28	Survival	13			28	Survival	6	<11.5			20	Survival	13	≥11.5		28	Survival	1	6
28	Survival	13			28	Survival	5	<11.5			21	Survival	14	≥11.5		28	Survival	1	5
28	Survival	10			28	Survival	3	<11.5			21	Survival	18	≥11.5		28	Survival	1	3
28	Survival	11			28	Survival	9	<11.5			23	Survival	20	≥11.5		28	Survival	1	9
28	Survival	5			28	Survival	11	<11.5			9	Survival	13	≥11.5		28	Survival	1	11
28	Survival	7			28	Survival	4	<11.5			12	Survival	14	≥11.5		28	Survival	1	4
28	Survival	13			28	Survival	5	<11.5			20	Survival	13	≥11.5		28	Survival	1	5
28	Survival	6			28	Survival	5	<11.5			18	Survival	13	≥11.5		28	Survival	1	5
28	Survival	9			28	Survival	3	<11.5				Survival				28	Survival	1	3
28	Survival	5			28	Survival	9	<11.5				Survival				28	Survival	1	9
28	Survival	9			28	Survival	9	<11.5				Survival				28	Survival	1	9
28	Survival	13			28	Survival	5	<11.5				Survival				28	Survival	1	5
28	Survival	6			28	Survival	11	<11.5				Survival				28	Survival	1	11
28	Survival	6			28	Survival	5	<11.5				Survival				28	Survival	1	5
28	Survival	5			28	Survival	8	<11.5				Survival				28	Survival	1	8
28	Survival	3			28	Survival	8	<11.5				Survival				28	Survival	1	8
28	Survival	9			28	Survival	10	<11.5				Survival				28	Survival	1	10
28	Survival	11			28	Survival	6	<11.5				Survival				28	Survival	1	6
28	Survival	4			28	Survival	9	<11.5				Survival				28	Survival	1	9
28	Survival	14			28	Survival	5	<11.5				Survival				28	Survival	1	5
28	Survival	5			28	Survival	5	<11.5				Survival				28	Survival	1	5
28	Survival	13			28	Survival	6	<11.5				Survival				28	Survival	1	6
28	Survival	5			28	Survival	6	<11.5				Survival				28	Survival	1	6
28	Survival	18			28	Survival	11	<11.5				Survival				28	Survival	1	11
28	Survival	3			28	Survival	5	<11.5				Survival				28	Survival	1	5
28	Survival	9			28	Survival	3	<11.5				Survival				28	Survival	1	3
28	Survival	9			28	Survival	5	<11.5				Survival				28	Survival	1	5
28	Survival	20			28	Survival	3	<11.5				Survival				28	Survival	1	3
28	Survival	5			28	Survival	6	<11.5				Survival				28	Survival	1	6
28	Survival	11			28	Survival	8	<11.5				Survival				28	Survival	1	8
28	Survival	5			28	Survival	7	<11.5				Survival				28	Survival	1	7
28	Survival	8			28	Survival	11	<11.5				Survival				28	Survival	1	11
28	Survival	19			28	Survival	8	<11.5				Survival				28	Survival	1	8
28	Survival	8			28	Survival	4	<11.5				Survival				28	Survival	1	4
28	Survival	10			28	Survival	10	<11.5				Survival				28	Survival	1	10
28	Survival	6			28	Survival	4	<11.5				Survival				28	Survival	1	4
28	Survival	9			28	Survival	10	<11.5				Survival				28	Survival	1	10
28	Survival	5			28	Survival	5	<11.5				Survival				28	Survival	1	5
28	Survival	5			28	Survival	4	<11.5				Survival				28	Survival	1	4
28	Survival	6			28	Survival	6	<11.5				Survival				28	Survival	1	6
28	Survival	6			28	Survival	10	<11.5				Survival				28	Survival	1	10
28	Survival	11			28	Survival	10	<11.5				Survival				28	Survival	1	10
28	Survival	5			28	Survival	5	<11.5				Survival				28	Survival	1	5
28	Survival	3			28	Survival	7	<11.5				Survival				28	Survival	1	7
28	Survival	5			28	Survival	7	<11.5				Survival				28	Survival	1	7
28	Survival	3			28	Survival	4	<11.5				Survival				28	Survival	1	4
28	Survival	6			28	Survival	7	<11.5				Survival				28	Survival	1	7
28	Survival	8			28	Survival	11	<11.5				Survival				28	Survival	1	11
28	Survival	7			28	Survival	8	<11.5				Survival				28	Survival	1	8
28	Survival	11			28	Survival	6	<11.5				Survival				28	Survival	1	6
28	Survival	8			28	Survival	5	<11.5				Survival				28	Survival	1	5
28	Survival	4			28	Survival	6	<11.5				Survival				28	Survival	1	6
28	Survival	10			28	Survival	7	<11.5				Survival				28	Survival	1	7
28	Survival	4			28	Survival	3	<11.5				Survival				28	Survival	1	3
28	Survival	10			28	Survival	10	<11.5				Survival				28	Survival	1	10
28	Survival	5			28	Survival	3	<11.5				Survival				28	Survival	1	3
28	Survival	4			28	Survival	5	<11.5				Survival				28	Survival	1	5
28	Survival	6			28	Survival	3	<11.5				Survival				28	Survival	1	3
28	Survival	10			28	Survival	3	<11.5				Survival				28	Survival	1	3
28	Survival	10			28	Survival	7	<11.5				Survival				28	Survival	1	7
28	Survival	5			28	Survival	7	<11.5				Survival				28	Survival	1	7
28	Survival	7			28	Survival	7	<11.5				Survival				28	Survival	1	7
28	Survival	13			28	Survival	6	<11.5				Survival				28	Survival	1	6
28	Survival	7			28	Survival	7	<11.5				Survival				28	Survival	1	7
28	Survival	4			28	Survival	3	<11.5				Survival				28	Survival	1	3
28	Survival	7			28	Survival	3	<11.5				Survival				28	Survival	1	3
28	Survival	11			28	Survival	10	<11.5				Survival				28	Survival	1	10
28	Survival	8			28	Survival	3	<11.5				Survival				28	Survival	1	3
28	Survival	6			28	Survival	10	<11.5				Survival				28	Survival	1	10
28	Survival	5			28	Survival	9	<11.5				Survival				28	Survival	1	9
28	Survival	6			1	Survival	4	<11.5				Survival				1	Survival	1	4
28	Survival	7			2	Survival	5	<11.5				Survival				2	Survival	1	5
28	Survival	3			2	Survival	9	<11.5				Survival				2	Survival	1	9
28	Survival	14			3	Survival	11	<11.5				Survival				3	Survival	1	11
28	Survival	10			4	Survival	6	<11.5				Survival				4	Survival	1	6
28	Survival	3			5	Survival	5	<11.5				Survival				5	Survival	1	5
28	Survival	5			5	Survival	10	<11.5				Survival				5	Survival	1	10
28	Survival	3			5	Survival	10	<11.5				Survival				5	Survival	1	10
28	Survival	3			6	Survival	4	<11.5				Survival				6	Survival	1	4
28	Survival	7			6	Survival	9	<11.5				Survival				6	Survival	1	9
28	Survival	7			6	Survival	11	<11.5				Survival				6	Survival	1	11
28	Survival	7			7	Survival	6	<11.5				Survival				7	Survival	1	6
28	Survival	6			7	Survival	8	<11.5				Survival				7	Survival	1	8
28	Survival	7			7	Survival	7	<11.5				Survival				7	Survival	1	7
28	Survival	3			7	Survival	11	<11.5				Survival				7	Survival	1	11
28	Survival	3			12	Survival	8	<11.5				Survival				12	Survival	1	8
28	Survival	14			10	Survival	9	<11.5				Survival				10	Survival	1	9
28	Survival	10			11	Survival	8	<11.5				Survival				11	Survival	1	8
28	Survival	3			12	Survival	6	<11.5				Survival				12	Survival	1	6
28	Survival	10			13	Survival	3	<11.5				Survival				13	Survival	1	3
28	Survival	9			21	Survival	9	<11.5				Survival				21	Survival	1	9
1	Dead	20			28	Dead	10	<11.5				Dead				28	Dead	1	10
1	Dead	4			28	Dead	11	<11.5				Dead				28	Dead	1	11
2	Dead	5				Dead						Dead				28	Dead	2	14
2	Dead	15				Dead						Dead				28	Dead	2	18
2	Dead	9				Dead						Dead				28	Dead	2	14
28	Dead	13				Dead						Dead				28	Dead	2	12
3	Dead	22				Dead						Dead				28	Dead	2	17
3	Dead	15				Dead						Dead				28	Dead	2	13
26	Dead	17				Dead						Dead				28	Dead	2	12
3	Dead	20				Dead						Dead				28	Dead	2	16
3	Dead	11				Dead						Dead				28	Dead	2	12
10	Dead	21				Dead						Dead				28	Dead	2	13
4	Dead	16				Dead						Dead				28	Dead	2	13
4	Dead	6				Dead						Dead				28	Dead	2	13
4	Dead	17				Dead						Dead				28	Dead	2	13
4	Dead	17				Dead						Dead				28	Dead	2	14
16	Dead	14				Dead						Dead				28	Dead	2	13
4	Dead	13				Dead						Dead				28	Dead	2	18
5	Dead	25				Dead						Dead				28	Dead	2	20
5	Dead	5				Dead						Dead				28	Dead	2	19
5	Dead	10				Dead						Dead				28	Dead	2	13
5	Dead	10				Dead						Dead				28	Dead	2	14
27	Dead	17				Dead						Dead				28	Dead	2	14
5	Dead	15				Dead						Dead				1	Dead	2	20
5	Dead	15				Dead						Dead				2	Dead	2	15
6	Dead	4				Dead						Dead				28	Dead	2	13
6	Dead	9				Dead						Dead				3	Dead	2	22
6	Dead	11				Dead						Dead				3	Dead	2	15
6	Dead	12				Dead						Dead				26	Dead	2	17
6	Dead	18				Dead						Dead				3	Dead	2	20
12	Dead	15				Dead						Dead				10	Dead	2	21
7	Dead	6				Dead						Dead				4	Dead	2	16
7	Dead	8				Dead						Dead				4	Dead	2	17
7	Dead	7				Dead						Dead				4	Dead	2	17
7	Dead	11				Dead						Dead				16	Dead	2	14
8	Dead	14				Dead						Dead				4	Dead	2	13
8	Dead	17				Dead						Dead				5	Dead	2	25
12	Dead	8				Dead						Dead				27	Dead	2	17
10	Dead	9				Dead						Dead				5	Dead	2	15
11	Dead	8				Dead						Dead				5	Dead	2	15
12	Dead	6				Dead						Dead				6	Dead	2	12
12	Dead	14				Dead						Dead				6	Dead	2	18
13	Dead	3				Dead						Dead				12	Dead	2	15
15	Dead	12				Dead						Dead				8	Dead	2	14
16	Dead	14				Dead						Dead				8	Dead	2	17
16	Dead	13				Dead						Dead				12	Dead	2	14
22	Dead	13				Dead						Dead				15	Dead	2	12
16	Dead	14				Dead						Dead				16	Dead	2	14
17	Dead	17				Dead						Dead				16	Dead	2	13
20	Dead	13				Dead						Dead				22	Dead	2	13
21	Dead	14				Dead						Dead				16	Dead	2	14
21	Dead	18				Dead						Dead				17	Dead	2	17
21	Dead	9				Dead						Dead				20	Dead	2	13
23	Dead	20				Dead						Dead				21	Dead	2	14
28	Dead	10				Dead						Dead				21	Dead	2	18
9	Dead	13				Dead						Dead				23	Dead	2	20
12	Dead	14				Dead						Dead				9	Dead	2	13
20	Dead	13				Dead						Dead				12	Dead	2	14
18	Dead	13				Dead						Dead				20	Dead	2	13
28	Dead	11				Dead						Dead				18	Dead	2	13

## Sheet: PLT 161.5
time	Outcome	PLT			time	Outcome	PLT	Group <161.5			time	Outcome	PLT	Group≥161.5		time	Outcome	Group <161.5	PLT		Results
28	Survival	217			28	Survival	118	1			28	Survival	217	2		28	Survival	1	118		Comparison of samples		Hazard ratio			Statistical Analysis
28	Survival	173			28	Survival	114	1			28	Survival	173	2		28	Survival	1	114		Treatment group	Reference group	HR	95%CI		Likelihood ratio test		Wald test		Logrank test
28	Survival	162			28	Survival	97	1			28	Survival	162	2		28	Survival	1	97					Lower	Upper	W-value	P-value	W-value	P-value	W-value	P-value
28	Survival	330			28	Survival	123	1			28	Survival	330	2		28	Survival	1	123		2=PLT≥161.5	1=PLT<161.5	0.15	0.08	0.29	42.11	8.6e-11	30.23	3.8e-08	40.38	2.1e-10
28	Survival	217			28	Survival	127	1			28	Survival	217	2		28	Survival	1	127
28	Survival	118			28	Survival	137	1			28	Survival	195	2		28	Survival	1	137		Comparison of samples		Hazard ratio			Statistical Analysis
28	Survival	195			28	Survival	81	1			28	Survival	330	2		28	Survival	1	81		Treatment group	Reference group	HR	95%CI		Likelihood ratio test		Wald test		Logrank test
28	Survival	330			28	Survival	128	1			28	Survival	169	2		28	Survival	1	128					Lower	Upper	W-value	P-value	W-value	P-value	W-value	P-value
28	Survival	114			28	Survival	110	1			28	Survival	201	2		28	Survival	1	110		1=PLT<161.5	2=PLT≥161.5	6.75	3.42	13.32	42.11	8.6e-11	30.23	3.8e-08	40.38	2.1e-10
28	Survival	169			28	Survival	116	1			28	Survival	248	2		28	Survival	1	116
28	Survival	201			28	Survival	116	1			28	Survival	293	2		28	Survival	1	116
28	Survival	248			28	Survival	153	1			28	Survival	164	2		28	Survival	1	153
28	Survival	293			28	Survival	137	1			28	Survival	401	2		28	Survival	1	137
28	Survival	164			28	Survival	125	1			28	Survival	206	2		28	Survival	1	125
28	Survival	401			28	Survival	137	1			28	Survival	166	2		28	Survival	1	137
28	Survival	206			28	Survival	138	1			28	Survival	173	2		28	Survival	1	138
28	Survival	166			28	Survival	111	1			28	Survival	241	2		28	Survival	1	111
28	Survival	173			28	Survival	99	1			28	Survival	278	2		28	Survival	1	99
28	Survival	241			28	Survival	104	1			28	Survival	299	2		28	Survival	1	104
28	Survival	278			28	Survival	129	1			28	Survival	240	2		28	Survival	1	129
28	Survival	299			28	Survival	117	1			28	Survival	193	2		28	Survival	1	117
28	Survival	240			28	Survival	128	1			28	Survival	163	2		28	Survival	1	128
28	Survival	97			28	Survival	154	1			28	Survival	666	2		28	Survival	1	154
28	Survival	193			28	Survival	41	1			28	Survival	265	2		28	Survival	1	41
28	Survival	123			28	Survival	136	1			28	Survival	385	2		28	Survival	1	136
28	Survival	163			28	Survival	123	1			28	Survival	257	2		28	Survival	1	123
28	Survival	666			28	Survival	135	1			28	Survival	322	2		28	Survival	1	135
28	Survival	127			28	Survival	77	1			28	Survival	390	2		28	Survival	1	77
28	Survival	265			28	Survival	127	1			28	Survival	217	2		28	Survival	1	127
28	Survival	385			28	Survival	81	1			28	Survival	209	2		28	Survival	1	81
28	Survival	137			28	Survival	38	1			28	Survival	311	2		28	Survival	1	38
28	Survival	257			28	Survival	73	1			28	Survival	168	2		28	Survival	1	73
28	Survival	322			28	Survival	91	1			28	Survival	228	2		28	Survival	1	91
28	Survival	81			28	Survival	122	1			28	Survival	172	2		28	Survival	1	122
28	Survival	390			28	Survival	110	1			28	Survival	164	2		28	Survival	1	110
28	Survival	128			28	Survival	108	1			28	Survival	166	2		28	Survival	1	108
28	Survival	217			28	Survival	131	1			28	Survival	293	2		28	Survival	1	131
28	Survival	110			28	Survival	134	1			28	Survival	222	2		28	Survival	1	134
28	Survival	209			28	Survival	105	1			28	Survival	302	2		28	Survival	1	105
28	Survival	311			28	Survival	109	1			28	Survival	238	2		28	Survival	1	109
28	Survival	168			28	Survival	109	1			28	Survival	172	2		28	Survival	1	109
28	Survival	228			28	Survival	83	1			28	Survival	250	2		28	Survival	1	83
28	Survival	116			28	Survival	102	1			28	Survival	569	2		28	Survival	1	102
28	Survival	172			28	Survival	62	1			28	Survival	204	2		28	Survival	1	62
28	Survival	164			28	Survival	55	1			28	Survival	209	2		28	Survival	1	55
28	Survival	116			28	Survival	139	1			28	Survival	472	2		28	Survival	1	139
28	Survival	153			28	Survival	97	1			28	Survival	325	2		28	Survival	1	97
28	Survival	166			28	Survival	93	1			28	Survival	167	2		28	Survival	1	93
28	Survival	137			1	Survival	94	1			28	Survival	205	2		1	Survival	1	94
28	Survival	293			2	Survival	99	1			28	Survival	319	2		2	Survival	1	99
28	Survival	222			2	Survival	149	1			28	Survival	180	2		2	Survival	1	149
28	Survival	125			2	Survival	161	1			28	Survival	264	2		2	Survival	1	161
28	Survival	137			28	Survival	74	1			28	Survival	190	2		28	Survival	1	74
28	Survival	138			3	Survival	58	1			28	Survival	223	2		3	Survival	1	58
28	Survival	111			3	Survival	111	1			28	Survival	344	2		3	Survival	1	111
28	Survival	99			26	Survival	68	1			28	Survival	306	2		26	Survival	1	68
28	Survival	302			3	Survival	49	1			28	Survival	502	2		3	Survival	1	49
28	Survival	104			10	Survival	37	1			28	Survival	200	2		10	Survival	1	37
28	Survival	238			4	Survival	57	1			28	Survival	232	2		4	Survival	1	57
28	Survival	129			4	Survival	44	1			28	Survival	260	2		4	Survival	1	44
28	Survival	172			16	Survival	57	1			28	Survival	219	2		16	Survival	1	57
28	Survival	250			4	Survival	37	1			28	Survival	201	2		4	Survival	1	37
28	Survival	569			5	Survival	31	1			28	Survival	194	2		5	Survival	1	31
28	Survival	204			5	Survival	81	1			28	Survival	195	2		5	Survival	1	81
28	Survival	209			5	Survival	62	1			28	Survival	234	2		5	Survival	1	62
28	Survival	472			5	Survival	98	1			28	Survival	210	2		5	Survival	1	98
28	Survival	117			27	Survival	75	1			28	Survival	382	2		27	Survival	1	75
28	Survival	128			5	Survival	102	1			28	Survival	190	2		5	Survival	1	102
28	Survival	325			5	Survival	118	1			28	Survival	166	2		5	Survival	1	118
28	Survival	154			6	Survival	101	1			28	Survival	333	2		6	Survival	1	101
28	Survival	41			6	Survival	54	1			28	Survival	181	2		6	Survival	1	54
28	Survival	167			6	Survival	62	1			28	Survival	267	2		6	Survival	1	62
28	Survival	136			6	Survival	137	1			28	Survival	244	2		6	Survival	1	137
28	Survival	205			12	Survival	42	1			28	Survival	216	2		12	Survival	1	42
28	Survival	319			7	Survival	146	1			28	Survival	169	2		7	Survival	1	146
28	Survival	180			7	Survival	111	1			28	Survival	249	2		7	Survival	1	111
28	Survival	264			8	Survival	124	1			28	Survival	298	2		8	Survival	1	124
28	Survival	123			12	Survival	129	1			28	Survival	236	2		12	Survival	1	129
28	Survival	190			10	Survival	41	1			28	Survival	338	2		10	Survival	1	41
28	Survival	223			11	Survival	147	1			28	Survival	372	2		11	Survival	1	147
28	Survival	344			12	Survival	110	1			28	Survival	358	2		12	Survival	1	110
28	Survival	306			12	Survival	95	1			28	Survival	300	2		12	Survival	1	95
28	Survival	502			13	Survival	37	1			28	Survival	434	2		13	Survival	1	37
28	Survival	200			15	Survival	59	1			28	Survival	265	2		15	Survival	1	59
28	Survival	232			16	Survival	50	1			28	Survival	360	2		16	Survival	1	50
28	Survival	260			16	Survival	116	1			28	Survival	164	2		16	Survival	1	116
28	Survival	219			22	Survival	87	1			28	Survival	290	2		22	Survival	1	87
28	Survival	135			16	Survival	73	1			28	Survival	244	2		16	Survival	1	73
28	Survival	201			17	Survival	121	1			28	Survival	245	2		17	Survival	1	121
28	Survival	77			20	Survival	89	1			28	Survival	175	2		20	Survival	1	89
28	Survival	194			21	Survival	118	1			28	Survival	269	2		21	Survival	1	118
28	Survival	195			21	Survival	76	1			28	Survival	198	2		21	Survival	1	76
28	Survival	234			23	Survival	34	1			28	Survival	313	2		23	Survival	1	34
28	Survival	210			9	Survival	88	1			1	Survival	165	2		9	Survival	1	88
28	Survival	382			12	Survival	130	1			3	Survival	210	2		12	Survival	1	130
28	Survival	190			20	Survival	95	1			4	Survival	171	2		20	Survival	1	95
28	Survival	127			18	Survival	130	1			4	Survival	197	2		18	Survival	1	130
28	Survival	81			28	Survival	106	1			6	Survival	298	2		28	Survival	1	106
28	Survival	166				Survival					7	Survival	399	2		28	Survival	2	217
28	Survival	38				Survival					7	Survival	265	2		28	Survival	2	173
28	Survival	73				Survival					8	Survival	165	2		28	Survival	2	162
28	Survival	333				Survival					21	Survival	196	2		28	Survival	2	330
28	Survival	181				Survival					28	Survival	234	2		28	Survival	2	217
28	Survival	267				Survival						Survival				28	Survival	2	195
28	Survival	91				Survival						Survival				28	Survival	2	330
28	Survival	244				Survival						Survival				28	Survival	2	169
28	Survival	122				Survival						Survival				28	Survival	2	201
28	Survival	110				Survival						Survival				28	Survival	2	248
28	Survival	216				Survival						Survival				28	Survival	2	293
28	Survival	169				Survival						Survival				28	Survival	2	164
28	Survival	249				Survival						Survival				28	Survival	2	401
28	Survival	298				Survival						Survival				28	Survival	2	206
28	Survival	236				Survival						Survival				28	Survival	2	166
28	Survival	338				Survival						Survival				28	Survival	2	173
28	Survival	108				Survival						Survival				28	Survival	2	241
28	Survival	372				Survival						Survival				28	Survival	2	278
28	Survival	131				Survival						Survival				28	Survival	2	299
28	Survival	134				Survival						Survival				28	Survival	2	240
28	Survival	358				Survival						Survival				28	Survival	2	193
28	Survival	300				Survival						Survival				28	Survival	2	163
28	Survival	105				Survival						Survival				28	Survival	2	666
28	Survival	109				Survival						Survival				28	Survival	2	265
28	Survival	109				Survival						Survival				28	Survival	2	385
28	Survival	83				Survival						Survival				28	Survival	2	257
28	Survival	102				Survival						Survival				28	Survival	2	322
28	Survival	434				Survival						Survival				28	Survival	2	390
28	Survival	265				Survival						Survival				28	Survival	2	217
28	Survival	62				Survival						Survival				28	Survival	2	209
28	Survival	360				Survival						Survival				28	Survival	2	311
28	Survival	55				Survival						Survival				28	Survival	2	168
28	Survival	164				Survival						Survival				28	Survival	2	228
28	Survival	139				Survival						Survival				28	Survival	2	172
28	Survival	97				Survival						Survival				28	Survival	2	164
28	Survival	93				Survival						Survival				28	Survival	2	166
28	Survival	290				Survival						Survival				28	Survival	2	293
28	Survival	244				Survival						Survival				28	Survival	2	222
28	Survival	245				Survival						Survival				28	Survival	2	302
28	Survival	175				Survival						Survival				28	Survival	2	238
28	Survival	269				Survival						Survival				28	Survival	2	172
28	Survival	198				Survival						Survival				28	Survival	2	250
28	Survival	313				Survival						Survival				28	Survival	2	569
1	Dead	94				Dead						Dead				28	Dead	2	204
1	Dead	165				Dead						Dead				28	Dead	2	209
2	Dead	99				Dead						Dead				28	Dead	2	472
2	Dead	149				Dead						Dead				28	Dead	2	325
2	Dead	161				Dead						Dead				28	Dead	2	167
28	Dead	74				Dead						Dead				28	Dead	2	205
3	Dead	58				Dead						Dead				28	Dead	2	319
3	Dead	111				Dead						Dead				28	Dead	2	180
26	Dead	68				Dead						Dead				28	Dead	2	264
3	Dead	49				Dead						Dead				28	Dead	2	190
3	Dead	210				Dead						Dead				28	Dead	2	223
10	Dead	37				Dead						Dead				28	Dead	2	344
4	Dead	57				Dead						Dead				28	Dead	2	306
4	Dead	171				Dead						Dead				28	Dead	2	502
4	Dead	197				Dead						Dead				28	Dead	2	200
4	Dead	44				Dead						Dead				28	Dead	2	232
16	Dead	57				Dead						Dead				28	Dead	2	260
4	Dead	37				Dead						Dead				28	Dead	2	219
5	Dead	31				Dead						Dead				28	Dead	2	201
5	Dead	81				Dead						Dead				28	Dead	2	194
5	Dead	62				Dead						Dead				28	Dead	2	195
5	Dead	98				Dead						Dead				28	Dead	2	234
27	Dead	75				Dead						Dead				28	Dead	2	210
5	Dead	102				Dead						Dead				28	Dead	2	382
5	Dead	118				Dead						Dead				28	Dead	2	190
6	Dead	101				Dead						Dead				28	Dead	2	166
6	Dead	54				Dead						Dead				28	Dead	2	333
6	Dead	62				Dead						Dead				28	Dead	2	181
6	Dead	137				Dead						Dead				28	Dead	2	267
6	Dead	298				Dead						Dead				28	Dead	2	244
12	Dead	42				Dead						Dead				28	Dead	2	216
7	Dead	146				Dead						Dead				28	Dead	2	169
7	Dead	399				Dead						Dead				28	Dead	2	249
7	Dead	111				Dead						Dead				28	Dead	2	298
7	Dead	265				Dead						Dead				28	Dead	2	236
8	Dead	165				Dead						Dead				28	Dead	2	338
8	Dead	124				Dead						Dead				28	Dead	2	372
12	Dead	129				Dead						Dead				28	Dead	2	358
10	Dead	41				Dead						Dead				28	Dead	2	300
11	Dead	147				Dead						Dead				28	Dead	2	434
12	Dead	110				Dead						Dead				28	Dead	2	265
12	Dead	95				Dead						Dead				28	Dead	2	360
13	Dead	37				Dead						Dead				28	Dead	2	164
15	Dead	59				Dead						Dead				28	Dead	2	290
16	Dead	50				Dead						Dead				28	Dead	2	244
16	Dead	116				Dead						Dead				28	Dead	2	245
22	Dead	87				Dead						Dead				28	Dead	2	175
16	Dead	73				Dead						Dead				28	Dead	2	269
17	Dead	121				Dead						Dead				28	Dead	2	198
20	Dead	89				Dead						Dead				28	Dead	2	313
21	Dead	196				Dead						Dead				1	Dead	2	165
21	Dead	118				Dead						Dead				3	Dead	2	210
21	Dead	76				Dead						Dead				4	Dead	2	171
23	Dead	34				Dead						Dead				4	Dead	2	197
28	Dead	234				Dead						Dead				6	Dead	2	298
9	Dead	88				Dead						Dead				7	Dead	2	399
12	Dead	130				Dead						Dead				7	Dead	2	265
20	Dead	95				Dead						Dead				8	Dead	2	165
18	Dead	130				Dead						Dead				21	Dead	2	196
28	Dead	106				Dead						Dead				28	Dead	2	234

## Sheet: DDIPLT different groups
age	D-DI/PLT		Gender	D-DI/PLT		diabetes mellitus	D-DI/PLT		Hypertension	D-DI/PLT		pathogene	D-DI/PLT		Results
47	0.0254378		Female	0.0254378		No	0.0254378		Yes	0.0254378		gram-	0.0254378		Characteristics	male(N=137)	female(N=64)	Total(N=201)	P value	Gender
79	0.0150289		Female	0.0150289		No	0.0150289		Yes	0.0150289		gram-	0.0150289		D-DI/PLT
77	0.00981481		Female	0.00981481		Yes	0.00981481		Yes	0.00981481		gram+	0.00981481		Mean±SD	0.09±0.19	0.08±0.20	0.09±0.19	0.74
69	0.00781818		Male	0.00781818		Yes	0.00781818		No	0.00781818		gram-	0.00781818		Median(min-max)	0.03(6.0e-4,1.46)	0.03(2.4e-4,1.50)	0.03(2.4e-4,1.50)	0.43
61	0.0163594		Male	0.0163594		No	0.0163594		No	0.0163594		gram-	0.0163594
57	0.0101695		Male	0.0101695		No	0.0101695		No	0.0101695		gram+	0.0101695		Characteristics	0(N=149)	1(N=52)	Total(N=201)	P value	Diabetes
54	0.0125128		Female	0.0125128		No	0.0125128		No	0.0125128		gram-	0.0125128		D-DI/PLT
51	0.0140303		Male	0.0140303		No	0.0140303		Yes	0.0140303		gram-	0.0140303		Mean±SD	0.10±0.22	0.06±0.10	0.09±0.19	0.12
68	0.0231579		Female	0.0231579		No	0.0231579		Yes	0.0231579		gram+	0.0231579		Median(min-max)	0.03(6.0e-4,1.50)	0.02(2.4e-4,0.52)	0.03(2.4e-4,1.50)	0.17
80	0.0207101		Female	0.0207101		No	0.0207101		Yes	0.0207101		gram-	0.0207101
77	0.0308458		Female	0.0308458		No	0.0308458		Yes	0.0308458		gram-	0.0308458		Characteristics	0(N=112)	1(N=89)	Total(N=201)	P value	Hypertension
50	0.00766129		Female	0.00766129		No	0.00766129		No	0.00766129		gram-	0.00766129		D-DI/PLT
79	0.00491468		Male	0.00491468		No	0.00491468		No	0.00491468		gram-	0.00491468		Mean±SD	0.09±0.18	0.08±0.21	0.09±0.19	0.79
78	0.00884146		Male	0.00884146		No	0.00884146		Yes	0.00884146		gram-	0.00884146		Median(min-max)	0.03(2.4e-4,1.50)	0.02(1.5e-3,1.46)	0.03(2.4e-4,1.50)	0.55
74	0.0199002		Female	0.0199002		No	0.0199002		No	0.0199002		gram+	0.0199002
69	0.0352427		Male	0.0352427		No	0.0352427		No	0.0352427		gram+	0.0352427
56	0.0201807		Female	0.0201807		No	0.0201807		Yes	0.0201807		gram-	0.0201807
48	0.0223121		Female	0.0223121		No	0.0223121		No	0.0223121		gram+	0.0223121
44	0.00659751		Male	0.00659751		No	0.00659751		No	0.00659751		gram+	0.00659751
72	0.00194245		Female	0.00194245		No	0.00194245		No	0.00194245		gram-	0.00194245
55	0.00377926		Female	0.00377926		Yes	0.00377926		Yes	0.00377926		gram-	0.00377926
72	0.00225		Male	0.00225		Yes	0.00225		No	0.00225		gram-	0.00225
77	0.00608247		Female	0.00608247		No	0.00608247		Yes	0.00608247		gram-	0.00608247
76	0.0221762		Male	0.0221762		Yes	0.0221762		Yes	0.0221762		gram-	0.0221762
75	0.0180488		Female	0.0180488		Yes	0.0180488		No	0.0180488		gram-	0.0180488
71	0.00484663		Male	0.00484663		Yes	0.00484663		Yes	0.00484663		gram-	0.00484663
66	0.0119069		Female	0.0119069		No	0.0119069		Yes	0.0119069		gram-	0.0119069
65	0.035748		Male	0.035748		No	0.035748		Yes	0.035748		gram-	0.035748
62	0.0168302		Female	0.0168302		No	0.0168302		No	0.0168302		gram-	0.0168302
60	0.00641558		Male	0.00641558		Yes	0.00641558		Yes	0.00641558		gram-	0.00641558
58	0.0229927		Female	0.0229927		No	0.0229927		No	0.0229927		gram-	0.0229927
58	0.0114786		Female	0.0114786		No	0.0114786		Yes	0.0114786		gram-	0.0114786
49	0.00145963		Female	0.00145963		No	0.00145963		Yes	0.00145963		gram-	0.00145963
69	0.0223457		Female	0.0223457		Yes	0.0223457		Yes	0.0223457		gram+	0.0223457
29	0.00871795		Female	0.00871795		No	0.00871795		No	0.00871795		gram-	0.00871795
79	0.018125		Female	0.018125		No	0.018125		Yes	0.018125		gram-	0.018125
76	0.0173733		Male	0.0173733		No	0.0173733		Yes	0.0173733		gram+	0.0173733
69	0.0205455		Female	0.0205455		No	0.0205455		No	0.0205455		gram-	0.0205455
64	0.0130144		Female	0.0130144		Yes	0.0130144		Yes	0.0130144		gram-	0.0130144
58	0.00363344		Female	0.00363344		Yes	0.00363344		Yes	0.00363344		gram+ and gram-	0.00363344
45	0.00714286		Male	0.00714286		No	0.00714286		No	0.00714286		gram+	0.00714286
44	0.00679825		Male	0.00679825		No	0.00679825		No	0.00679825		gram-	0.00679825
29	0.0260345		Female	0.0260345		No	0.0260345		No	0.0260345		gram+	0.0260345
25	0.0212791		Female	0.0212791		No	0.0212791		No	0.0212791		gram-	0.0212791
24	0.0104878		Male	0.0104878		No	0.0104878		No	0.0104878		gram-	0.0104878
20	0.00594828		Female	0.00594828		No	0.00594828		No	0.00594828		gram-	0.00594828
65	0.0641176		Female	0.0641176		No	0.0641176		No	0.0641176		gram-	0.0641176
56	0.00915663		Female	0.00915663		No	0.00915663		No	0.00915663		gram-	0.00915663
78	0.0278832		Female	0.0278832		No	0.0278832		No	0.0278832		gram-	0.0278832
71	0.0140273		Female	0.0140273		No	0.0140273		Yes	0.0140273		gram-	0.0140273
68	0.0290991		Male	0.0290991		No	0.0290991		Yes	0.0290991		gram-	0.0290991
66	0.06712		Male	0.06712		No	0.06712		No	0.06712		gram-	0.06712
65	0.00262774		Female	0.00262774		Yes	0.00262774		No	0.00262774		gram+	0.00262774
62	0.0144203		Female	0.0144203		Yes	0.0144203		Yes	0.0144203		gram-	0.0144203
58	0.0551351		Male	0.0551351		No	0.0551351		Yes	0.0551351		gram-	0.0551351
58	0.0357576		Female	0.0357576		Yes	0.0357576		No	0.0357576		gram-	0.0357576
58	0.0237417		Female	0.0237417		No	0.0237417		No	0.0237417		gram-	0.0237417
54	0.00548077		Female	0.00548077		No	0.00548077		No	0.00548077		gram-	0.00548077
40	0.00470588		Female	0.00470588		No	0.00470588		No	0.00470588		gram-	0.00470588
80	0.0102326		Female	0.0102326		No	0.0102326		Yes	0.0102326		gram-	0.0102326
71	0.0138953		Female	0.0138953		Yes	0.0138953		Yes	0.0138953		gram-	0.0138953
70	0.01232		Female	0.01232		No	0.01232		Yes	0.01232		gram+	0.01232
69	0.0152373		Female	0.0152373		No	0.0152373		Yes	0.0152373		gram-	0.0152373
65	0.0547549		Female	0.0547549		No	0.0547549		No	0.0547549		gram+	0.0547549
57	0.0448804		Female	0.0448804		No	0.0448804		Yes	0.0448804		gram+	0.0448804
57	0.00300847		Female	0.00300847		No	0.00300847		No	0.00300847		gram-	0.00300847
54	0.0426496		Female	0.0426496		Yes	0.0426496		Yes	0.0426496		gram+	0.0426496
51	0.125		Male	0.125		No	0.125		No	0.125		gram-	0.125
51	0.0113231		Male	0.0113231		No	0.0113231		Yes	0.0113231		gram+	0.0113231
50	0.0107143		Female	0.0107143		Yes	0.0107143		Yes	0.0107143		gram+	0.0107143
43	0.0719512		Female	0.0719512		No	0.0719512		Yes	0.0719512		gram-	0.0719512
36	0.0307186		Female	0.0307186		No	0.0307186		Yes	0.0307186		gram-	0.0307186
35	0.00808824		Male	0.00808824		No	0.00808824		No	0.00808824		gram+	0.00808824
34	0.064		Female	0.064		No	0.064		Yes	0.064		gram+	0.064
15	0.0145141		Female	0.0145141		No	0.0145141		No	0.0145141		gram+	0.0145141
38	0.0035		Male	0.0035		No	0.0035		Yes	0.0035		gram-	0.0035
65	0.00772727		Female	0.00772727		No	0.00772727		No	0.00772727		gram-	0.00772727
60	0.0660163		Female	0.0660163		Yes	0.0660163		Yes	0.0660163		gram+	0.0660163
56	0.0198947		Male	0.0198947		Yes	0.0198947		Yes	0.0198947		gram-	0.0198947
56	0.0393722		Female	0.0393722		No	0.0393722		No	0.0393722		gram-	0.0393722
56	0.00729651		Female	0.00729651		No	0.00729651		No	0.00729651		gram-	0.00729651
52	0.00771242		Male	0.00771242		Yes	0.00771242		Yes	0.00771242		gram-	0.00771242
47	0.012749		Female	0.012749		No	0.012749		No	0.012749		gram+	0.012749
44	0.02525		Male	0.02525		No	0.02525		No	0.02525		gram-	0.02525
38	0.000603448		Female	0.000603448		No	0.000603448		No	0.000603448		gram-	0.000603448
35	0.0426154		Female	0.0426154		No	0.0426154		No	0.0426154		gram-	0.0426154
60	0.019726		Female	0.019726		Yes	0.019726		Yes	0.019726		gram-	0.019726
36	0.0146667		Female	0.0146667		No	0.0146667		Yes	0.0146667		gram+	0.0146667
78	0.00412935		Female	0.00412935		Yes	0.00412935		No	0.00412935		gram-	0.00412935
73	0.0285714		Female	0.0285714		No	0.0285714		No	0.0285714		gram+	0.0285714
68	0.00396907		Male	0.00396907		No	0.00396907		No	0.00396907		gram-	0.00396907
63	0.0625641		Female	0.0625641		No	0.0625641		No	0.0625641		gram+	0.0625641
58	0.00846154		Female	0.00846154		Yes	0.00846154		Yes	0.00846154		gram-	0.00846154
55	0.0101429		Female	0.0101429		Yes	0.0101429		No	0.0101429		gram-	0.0101429
55	0.00167539		Female	0.00167539		Yes	0.00167539		No	0.00167539		gram+	0.00167539
52	0.00178947		Male	0.00178947		Yes	0.00178947		Yes	0.00178947		gram+	0.00178947
49	0.0143307		Male	0.0143307		No	0.0143307		No	0.0143307		gram+	0.0143307
44	0.135185		Male	0.135185		No	0.135185		No	0.135185		gram-	0.135185
79	0.00981928		Female	0.00981928		No	0.00981928		Yes	0.00981928		gram+	0.00981928
75	0.178947		Female	0.178947		No	0.178947		Yes	0.178947		gram+	0.178947
64	0.199178		Male	0.199178		Yes	0.199178		Yes	0.199178		gram+	0.199178
38	0.00024024		Male	0.00024024		Yes	0.00024024		No	0.00024024		gram+	0.00024024
61	0.0241989		Female	0.0241989		No	0.0241989		No	0.0241989		Fungus	0.0241989
42	0.0318727		Female	0.0318727		Yes	0.0318727		Yes	0.0318727		Fungus	0.0318727
68	0.0248352		Female	0.0248352		No	0.0248352		No	0.0248352		gram+	0.0248352
65	0.0470492		Female	0.0470492		No	0.0470492		No	0.0470492		gram+	0.0470492
57	0.0182787		Male	0.0182787		No	0.0182787		No	0.0182787		Fungus	0.0182787
54	0.0760909		Female	0.0760909		No	0.0760909		No	0.0760909		Fungus	0.0760909
41	0.0335648		Male	0.0335648		No	0.0335648		Yes	0.0335648		gram+	0.0335648
37	0.0946746		Male	0.0946746		No	0.0946746		Yes	0.0946746		gram+	0.0946746
76	0.0178313		Male	0.0178313		Yes	0.0178313		Yes	0.0178313		gram-	0.0178313
66	0.00634228		Male	0.00634228		No	0.00634228		No	0.00634228		gram+	0.00634228
66	0.0034322		Female	0.0034322		No	0.0034322		Yes	0.0034322		gram+	0.0034322
61	0.0443787		Male	0.0443787		Yes	0.0443787		Yes	0.0443787		gram+	0.0443787
53	0.0252778		Female	0.0252778		No	0.0252778		No	0.0252778		gram-	0.0252778
51	0.00467742		Male	0.00467742		No	0.00467742		No	0.00467742		gram-	0.00467742
79	0.0325191		Female	0.0325191		Yes	0.0325191		No	0.0325191		Fungus	0.0325191
52	0.0347761		Female	0.0347761		No	0.0347761		Yes	0.0347761		Fungus	0.0347761
49	0.00561453		Male	0.00561453		No	0.00561453		No	0.00561453		gram+	0.00561453
42	0.0179		Female	0.0179		No	0.0179		Yes	0.0179		gram+	0.0179
29	0.0555238		Male	0.0555238		No	0.0555238		No	0.0555238		gram+	0.0555238
73	0.0129358		Female	0.0129358		Yes	0.0129358		No	0.0129358		gram-	0.0129358
61	0.0224771		Female	0.0224771		Yes	0.0224771		No	0.0224771		gram-	0.0224771
58	0.0613253		Male	0.0613253		No	0.0613253		No	0.0613253		gram+	0.0613253
48	0.0417647		Female	0.0417647		No	0.0417647		No	0.0417647		gram+	0.0417647
66	0.00463134		Male	0.00463134		Yes	0.00463134		Yes	0.00463134		gram+	0.00463134
78	0.0603774		Male	0.0603774		Yes	0.0603774		Yes	0.0603774		gram-	0.0603774
79	0.0319355		Female	0.0319355		No	0.0319355		Yes	0.0319355		gram+	0.0319355
57	0.00677778		Female	0.00677778		No	0.00677778		Yes	0.00677778		gram-	0.00677778
54	0.0287273		Female	0.0287273		No	0.0287273		Yes	0.0287273		gram+	0.0287273
40	0.0142073		Female	0.0142073		No	0.0142073		No	0.0142073		gram-	0.0142073
57	0.04		Male	0.04		No	0.04		No	0.04		gram+	0.04
58	0.0229897		Male	0.0229897		No	0.0229897		No	0.0229897		gram-	0.0229897
33	0.0452688		Female	0.0452688		No	0.0452688		No	0.0452688		gram-	0.0452688
68	0.00727586		Female	0.00727586		No	0.00727586		Yes	0.00727586		gram+	0.00727586
34	0.00459016		Female	0.00459016		No	0.00459016		No	0.00459016		gram+ and gram-	0.00459016
69	0.0190612		Female	0.0190612		No	0.0190612		Yes	0.0190612		gram+ and gram-	0.0190612
68	0.0838286		Female	0.0838286		Yes	0.0838286		No	0.0838286		gram+	0.0838286
71	0.0296654		Female	0.0296654		No	0.0296654		Yes	0.0296654		gram-	0.0296654
67	0.0230303		Female	0.0230303		Yes	0.0230303		Yes	0.0230303		gram+	0.0230303
68	0.0325879		Male	0.0325879		Yes	0.0325879		No	0.0325879		gram+ and gram-	0.0325879
63	0.135745		Female	0.135745		No	0.135745		No	0.135745		gram+ and gram-	0.135745
58	0.0484242		Female	0.0484242		Yes	0.0484242		Yes	0.0484242		gram-	0.0484242
76	0.135152		Female	0.135152		Yes	0.135152		Yes	0.135152		gram+	0.135152
70	0.0278523		Female	0.0278523		No	0.0278523		Yes	0.0278523		gram-	0.0278523
69	0.125528		Female	0.125528		Yes	0.125528		Yes	0.125528		gram+	0.125528
39	0.123243		Male	0.123243		Yes	0.123243		No	0.123243		gram-	0.123243
80	0.277931		Female	0.277931		No	0.277931		Yes	0.277931		gram-	0.277931
35	0.542613		Female	0.542613		No	0.542613		Yes	0.542613		gram-	0.542613
80	0.185735		Male	0.185735		No	0.185735		No	0.185735		gram-	0.185735
72	1.45878		Female	1.45878		No	1.45878		Yes	1.45878		gram+	1.45878
66	0.0988571		Male	0.0988571		Yes	0.0988571		Yes	0.0988571		gram-	0.0988571
65	0.176486		Female	0.176486		No	0.176486		No	0.176486		gram-	0.176486
75	0.0682456		Female	0.0682456		No	0.0682456		No	0.0682456		gram-	0.0682456
35	0.0680702		Female	0.0680702		No	0.0680702		Yes	0.0680702		gram-	0.0680702
80	0.0346701		Female	0.0346701		Yes	0.0346701		Yes	0.0346701		gram-	0.0346701
79	0.0879545		Male	0.0879545		No	0.0879545		Yes	0.0879545		gram-	0.0879545
72	0.259825		Male	0.259825		Yes	0.259825		Yes	0.259825		gram+	0.259825
25	0.686216		Female	0.686216		No	0.686216		No	0.686216		gram+	0.686216
67	0.51871		Female	0.51871		Yes	0.51871		No	0.51871		gram+	0.51871
51	0.178025		Female	0.178025		No	0.178025		No	0.178025		gram-	0.178025
80	0.245161		Female	0.245161		Yes	0.245161		No	0.245161		gram-	0.245161
55	0.120408		Female	0.120408		No	0.120408		Yes	0.120408		gram-	0.120408
79	0.103867		Female	0.103867		No	0.103867		No	0.103867		gram+	0.103867
80	0.253627		Female	0.253627		No	0.253627		Yes	0.253627		gram+	0.253627
68	0.204322		Female	0.204322		No	0.204322		No	0.204322		gram-	0.204322
55	0.142475		Male	0.142475		No	0.142475		No	0.142475		gram-	0.142475
69	0.110926		Female	0.110926		No	0.110926		No	0.110926		gram+	0.110926
69	0.0917742		Female	0.0917742		No	0.0917742		No	0.0917742		gram-	0.0917742
64	0.0187591		Female	0.0187591		No	0.0187591		Yes	0.0187591		gram+	0.0187591
64	0.205671		Male	0.205671		No	0.205671		No	0.205671		gram+	0.205671
45	0.292381		Female	0.292381		No	0.292381		No	0.292381		gram-	0.292381
33	0.030411		Female	0.030411		No	0.030411		No	0.030411		gram+	0.030411
71	0.0203509		Female	0.0203509		No	0.0203509		No	0.0203509		gram-	0.0203509
53	0.0278378		Male	0.0278378		No	0.0278378		No	0.0278378		Fungus	0.0278378
24	0.117623		Female	0.117623		No	0.117623		No	0.117623		gram-	0.117623
68	0.0772727		Male	0.0772727		Yes	0.0772727		Yes	0.0772727		gram+	0.0772727
78	0.162984		Male	0.162984		No	0.162984		Yes	0.162984		gram+	0.162984
65	0.158915		Female	0.158915		No	0.158915		Yes	0.158915		gram-	0.158915
31	1.50415		Male	1.50415		No	1.50415		No	1.50415		gram-	1.50415
79	0.054966		Female	0.054966		No	0.054966		No	0.054966		gram+	0.054966
30	0.0597273		Female	0.0597273		No	0.0597273		No	0.0597273		gram-	0.0597273
15	0.649158		Female	0.649158		No	0.649158		No	0.649158		gram+	0.649158
79	0.341351		Male	0.341351		No	0.341351		No	0.341351		gram-	0.341351
72	0.294237		Female	0.294237		No	0.294237		Yes	0.294237		gram+	0.294237
75	0.394		Male	0.394		No	0.394		No	0.394		gram-	0.394
62	0.0760345		Female	0.0760345		Yes	0.0760345		Yes	0.0760345		gram+	0.0760345
62	0.122299		Female	0.122299		No	0.122299		No	0.122299		gram-	0.122299
49	0.069726		Female	0.069726		No	0.069726		No	0.069726		gram-	0.069726
79	0.199174		Female	0.199174		Yes	0.199174		Yes	0.199174		gram-	0.199174
55	0.388315		Female	0.388315		Yes	0.388315		No	0.388315		gram-	0.388315
79	0.0912245		Female	0.0912245		No	0.0912245		No	0.0912245		gram+	0.0912245
65	0.0282203		Male	0.0282203		No	0.0282203		Yes	0.0282203		gram+	0.0282203
56	0.116053		Female	0.116053		No	0.116053		No	0.116053		gram+	0.116053
58	1.18235		Female	1.18235		No	1.18235		Yes	1.18235		gram-	1.18235
77	0.0717521		Male	0.0717521		No	0.0717521		No	0.0717521		gram+	0.0717521
54	0.251136		Female	0.251136		No	0.251136		No	0.251136		gram+	0.251136
70	0.0427692		Female	0.0427692		No	0.0427692		No	0.0427692		gram-	0.0427692
37	0.423158		Female	0.423158		No	0.423158		No	0.423158		gram-	0.423158
24	0.112		Male	0.112		No	0.112		No	0.112		gram+	0.112
59	0.0962264		Female	0.0962264		No	0.0962264		No	0.0962264		Fungus	0.0962264
